# Supplementary material for: Vernalization Attenuates Age-Dependent Decline of Glucosinolates in Cabbage (Brassica oleracea ssp. capitata) through Coordinated Transcriptomic and Metabolomic Reprogramming
Source: Research Square preprint supplement (doi:10.21203/rs.3.rs-8223426/v1), 2025-12-17
Supplement: Supplementary file 1 [file 91942ad21b69a16293179b7f.xlsx]

## Sheet: Sheet1
Supplementary Table S3. A total of 13,962 differentially expressed genes
No.	V40/NV down	V40/NV up	AV/NV down	AV/NV up	V40/AV down	V40/NV up
1	BolC01g038000.2J	BolC01g008400.2J	BolC04g034820.2J	BolC09g004830.2J	BolC01g038000.2J	BolC01g008400.2J
2	BolC01g049850.2J	BolC02g007240.2J	BolC04g018350.2J	BolC09g025360.2J	BolC03g018350.2J	BolC01g027000.2J
3	BolC03g018350.2J	BolC02g024770.2J	BolC03g055630.2J	BolC05g063440.2J	BolC03g044340.2J	BolC02g024770.2J
4	BolC03g044340.2J	BolC03g010810.2J	BolC07g054220.2J	BolC05g056510.2J	BolC04g001200.2J	BolC03g010810.2J
5	BolC04g029030.2J	BolC03g025900.2J	BolC09g031140.2J	BolC09g016030.2J	BolC04g029030.2J	BolC03g025900.2J
6	BolC04g034820.2J	BolC04g057930.2J	BolC02g006560.2J	BolC04g034660.2J	BolC05g050060.2J	BolC05g002730.2J
7	BolC05g011590.2J	BolC05g002730.2J	BolC06g029570.2J	BolC06g045760.2J	BolC05g056510.2J	BolC07g018190.2J
8	BolC05g050060.2J	BolC05g054210.2J	BolC08g025320.2J	BolC09g026400.2J	BolC06g044170.2J	BolC08g048010.2J
9	BolC08g025320.2J	BolC06g004110.2J	BolC09g057350.2J	BolC02g005120.2J	BolC07g012050.2J	BolC08g051770.2J
10	BolC08g030430.2J	BolC07g018190.2J	BolC05g051480.2J	BolC05g063480.2J	BolC09g004830.2J	BolC09g007640.2J
11	BolC04g004830.2J	BolC08g048010.2J	BolC09g055990.2J	BolC01g037600.2J	BolC03g025820.2J	BolC09g055780.2J
12	BolC04g012820.2J	BolC08g051770.2J	BolC07g042140.2J	BolC05g063460.2J	BolC04g012820.2J	BolCnng000950.2J
13	BolC03g025820.2J	BolC08g056620.2J	BolC09g023150.2J	BolC04g001200.2J	BolC04g061760.2J	BolC08g055710.2J
14	BolC06g006080.2J	BolC09g007640.2J	BolC04g029030.2J	BolC07g056740.2J	BolC03g001270.2J	BolC08g056620.2J
15	BolC08g003890.2J	BolC09g030940.2J	BolC03g013980.2J	BolC02g038700.2J	BolC01g051910.2J	BolC01g055480.2J
16	BolC06g044830.2J	BolC09g055780.2J	BolC04g015540.2J	BolC05g013420.2J	BolC01g049850.2J	BolC04g011140.2J
17	BolC06g019030.2J	BolC03g052390.2J	BolC05g051440.2J	BolC06g046600.2J	BolC04g031790.2J	BolC04g048750.2J
18	BolC01g004240.2J	BolC09g016030.2J	BolC09g061870.2J	BolC07g054030.2J	BolC01g003460.2J	BolC06g007680.2J
19	BolC01g017870.2J	BolC01g014130.2J	BolC03g011130.2J	BolC09g026410.2J	BolC07g056890.2J	BolC02g032050.2J
20	BolC06g044170.2J	BolC01g027000.2J	BolC04g002720.2J	BolC07g044960.2J	BolC05g005280.2J	BolC02g007240.2J
21	BolC06g046560.2J	BolC08g055710.2J	BolC03g041850.2J	BolC01g028080.2J	BolC05g004530.2J	BolC02g050010.2J
22	BolC03g004550.2J	BolCnng000950.2J	BolC02g033760.2J	BolC05g063490.2J	BolC09g005060.2J	BolC08g057280.2J
23	BolC01g051910.2J	BolC03g025920.2J	BolC02g001110.2J	BolC04g010660.2J	BolC03g056260.2J	BolC06g017380.2J
24	BolC09g057840.2J	BolC01g014440.2J	BolC08g012090.2J	BolC06g005160.2J	BolC01g054640.2J	BolC03g034950.2J
25	BolC09g028530.2J	BolC05g021560.2J	BolC06g007260.2J	BolC07g033320.2J	BolC08g020550.2J	BolC02g046850.2J
26	BolC02g032250.2J	BolC05g018600.2J	BolC07g042150.2J	BolC05g052500.2J	BolC06g045760.2J	BolC05g021560.2J
27	BolC09g058920.2J	BolC07g052220.2J	BolC08g016010.2J	BolC08g012430.2J	BolC05g006830.2J	BolC01g048400.2J
28	BolC04g015540.2J	BolC01g006770.2J	BolC08g000680.2J	BolC07g053950.2J	BolC01g019620.2J	BolC06g004110.2J
29	BolC07g046620.2J	BolC02g046850.2J	BolC02g034700.2J	BolC09g005930.2J	BolC02g050460.2J	BolC01g014440.2J
30	BolC08g042050.2J	BolC02g020330.2J	BolC02g034070.2J	BolC03g007640.2J	BolC04g030420.2J	BolC04g057130.2J
31	BolC08g013870.2J	BolC04g000960.2J	BolC05g052290.2J	BolC04g066070.2J	BolC04g022400.2J	BolC07g022300.2J
32	BolC05g040930.2J	BolC07g055620.2J	BolC06g046050.2J	BolC08g009200.2J	BolC09g039240.2J	BolC05g054210.2J
33	BolC07g054220.2J	BolC07g037380.2J	BolC06g039950.2J	BolC08g056620.2J	BolC06g043610.2J	BolC04g058490.2J
34	BolC05g008850.2J	BolC04g007940.2J	BolC01g025990.2J	BolC04g047610.2J	BolC08g042050.2J	BolC07g037350.2J
35	BolC08g016010.2J	BolC06g045250.2J	BolC05g053570.2J	BolC02g039760.2J	BolC05g054700.2J	BolC06g046050.2J
36	BolC01g048590.2J	BolC08g057280.2J	BolC05g007100.2J	BolC01g003580.2J	BolC03g004620.2J	BolC09g014850.2J
37	BolC06g005240.2J	BolC05g059070.2J	BolC04g058020.2J	BolC02g023450.2J	BolC03g003940.2J	BolC01g009470.2J
38	BolC05g037270.2J	BolC02g027060.2J	BolC05g001410.2J	BolC09g057780.2J	BolC08g009200.2J	BolC03g039130.2J
39	BolC06g051060.2J	BolC01g050400.2J	BolC01g046580.2J	BolC08g049780.2J	BolC09g057840.2J	BolC06g045250.2J
40	BolC07g012050.2J	BolC03g013700.2J	BolC01g009470.2J	BolC02g016690.2J	BolC01g039180.2J	BolC07g053310.2J
41	BolC01g017850.2J	BolC07g043430.2J	BolC05g038680.2J	BolC06g031680.2J	BolC02g001420.2J	BolC06g042070.2J
42	BolC04g020890.2J	BolC04g057130.2J	BolC03g073560.2J	BolC04g050820.2J	BolC01g048590.2J	BolC09g022370.2J
43	BolC07g056890.2J	BolC06g042070.2J	BolC09g021680.2J	BolC05g063400.2J	BolC03g031120.2J	BolC04g057930.2J
44	BolC04g033070.2J	BolC09g064570.2J	BolC08g011850.2J	BolC07g044920.2J	BolC02g055520.2J	BolC03g011130.2J
45	BolC08g054840.2J	BolC03g017210.2J	BolC05g030190.2J	BolC02g059820.2J	BolC09g029090.2J	BolC06g039950.2J
46	BolC02g056970.2J	BolC05g009020.2J	BolC03g043110.2J	BolC01g019620.2J	BolC03g073100.2J	BolC02g020330.2J
47	BolC05g052290.2J	BolC03g053410.2J	BolC06g030050.2J	BolC08g046870.2J	BolC07g008280.2J	BolC05g040500.2J
48	BolC07g059400.2J	BolC02g025880.2J	BolC05g054280.2J	BolC07g052220.2J	BolC04g066060.2J	BolC09g023290.2J
49	BolC04g050940.2J	BolC03g007640.2J	BolC08g053450.2J	BolC08g056300.2J	BolC06g043540.2J	BolC08g021390.2J
50	BolC03g030090.2J	BolC09g023290.2J	BolC01g000730.2J	BolC03g021110.2J	BolC09g061610.2J	BolC01g031180.2J
51	BolC06g047320.2J	BolC09g000400.2J	BolC03g051390.2J	BolC03g046370.2J	BolC04g004830.2J	BolC06g049060.2J
52	BolC05g047820.2J	BolC06g037220.2J	BolC08g057840.2J	BolC08g041650.2J	BolC03g001340.2J	BolC07g037380.2J
53	BolC04g040120.2J	BolC03g039130.2J	BolC07g034340.2J	BolC03g034380.2J	BolC01g000770.2J	BolC02g033760.2J
54	BolC06g017610.2J	BolC04g011140.2J	BolC08g044920.2J	BolC03g029720.2J	BolC03g019650.2J	BolC03g048300.2J
55	BolC07g051000.2J	BolC04g020360.2J	BolC01g000210.2J	BolC05g004830.2J	BolC07g019150.2J	BolC07g028870.2J
56	BolC09g057280.2J	BolC03g034950.2J	BolC08g016620.2J	BolC09g069020.2J	BolC05g011590.2J	BolC09g064570.2J
57	BolC03g003940.2J	BolC04g018340.2J	BolC06g029730.2J	BolC08g025810.2J	BolC06g006080.2J	BolC01g014130.2J
58	BolC08g041270.2J	BolC04g058490.2J	BolC01g003790.2J	BolC07g013700.2J	BolC08g030430.2J	BolC03g048280.2J
59	BolC09g053220.2J	BolC03g050430.2J	BolC08g012100.2J	BolC05g059070.2J	BolC01g017870.2J	BolC09g000400.2J
60	BolC08g048460.2J	BolC08g048280.2J	BolC09g030000.2J	BolC02g016720.2J	BolC01g052650.2J	BolC07g055620.2J
61	BolC04g008170.2J	BolC09g005930.2J	BolC03g048300.2J	BolC06g018870.2J	BolC07g021310.2J	BolC02g016810.2J
62	BolC01g000160.2J	BolC05g040250.2J	BolC07g042850.2J	BolC04g055220.2J	BolC08g049780.2J	BolC03g013700.2J
63	BolC04g014790.2J	BolC01g031180.2J	BolC03g048280.2J	BolC07g049130.2J	BolC06g006750.2J	BolC02g005720.2J
64	BolC03g072090.2J	BolC04g024030.2J	BolC01g023770.2J	BolC03g085480.2J	BolC05g063440.2J	BolC08g037500.2J
65	BolC08g025060.2J	BolC02g015600.2J	BolC04g055770.2J	BolC05g013650.2J	BolC08g028470.2J	BolC04g020360.2J
66	BolC04g008120.2J	BolC02g043170.2J	BolC06g000560.2J	BolC05g021170.2J	BolC04g056870.2J	BolC09g057350.2J
67	BolC02g007280.2J	BolC08g037500.2J	BolC09g069280.2J	BolC01g046750.2J	BolC05g044540.2J	BolC02g027060.2J
68	BolC03g016450.2J	BolC06g007680.2J	BolC07g050150.2J	BolC05g020840.2J	BolC09g053220.2J	BolC04g059360.2J
69	BolC01g003790.2J	BolC01g037890.2J	BolC09g025350.2J	BolC06g029300.2J	BolC02g016690.2J	BolC03g050050.2J
70	BolC03g019650.2J	BolC08g018980.2J	BolC08g007530.2J	BolC04g040790.2J	BolC02g032250.2J	BolC01g023390.2J
71	BolC06g006750.2J	BolC05g007550.2J	BolC06g017610.2J	BolC09g039240.2J	BolC04g053090.2J	BolC04g021290.2J
72	BolC06g043610.2J	BolC07g047170.2J	BolC06g046560.2J	BolC06g003860.2J	BolC04g010660.2J	BolC03g035130.2J
73	BolC07g056990.2J	BolC04g023180.2J	BolC08g040790.2J	BolC03g052390.2J	BolC04g033070.2J	BolC09g030940.2J
74	BolC03g006940.2J	BolC05g056920.2J	BolC05g047820.2J	BolC08g042770.2J	BolC07g013680.2J	BolC07g022290.2J
75	BolC01g018510.2J	BolC06g042740.2J	BolC05g011710.2J	BolC08g020550.2J	BolC06g005240.2J	BolC08g002460.2J
76	BolC07g021790.2J	BolC01g008250.2J	BolC06g006780.2J	BolC05g006830.2J	BolC03g029680.2J	BolC07g047170.2J
77	BolC07g026020.2J	BolC04g000660.2J	BolC04g030170.2J	BolC07g042430.2J	BolC07g033200.2J	BolC03g025920.2J
78	BolC09g027500.2J	BolC09g003710.2J	BolC08g044530.2J	BolC06g047360.2J	BolC05g037270.2J	BolC04g007940.2J
79	BolC01g003460.2J	BolC05g053930.2J	BolC09g053140.2J	BolC01g008790.2J	BolC07g051000.2J	BolC04g000460.2J
80	BolC02g009410.2J	BolC03g072020.2J	BolC03g014960.2J	BolC02g013520.2J	BolC02g039760.2J	BolC09g051890.2J
81	BolC04g031790.2J	BolC07g030910.2J	BolC06g046910.2J	BolC09g012900.2J	BolC08g019580.2J	BolC04g000660.2J
82	BolC03g071350.2J	BolC04g021380.2J	BolC07g047150.2J	BolC05g057050.2J	BolC02g027400.2J	BolC04g018350.2J
83	BolC07g042140.2J	BolC06g017380.2J	BolC03g006710.2J	BolC06g003890.2J	BolC08g025060.2J	BolC05g053570.2J
84	BolC07g057000.2J	BolC02g030080.2J	BolC06g044540.2J	BolC02g025880.2J	BolC03g013650.2J	BolC08g036360.2J
85	BolC06g040990.2J	BolC08g021390.2J	BolC02g005720.2J	BolC05g018600.2J	BolC05g052500.2J	BolC06g020690.2J
86	BolC07g052660.2J	BolC04g021290.2J	BolC08g017750.2J	BolC09g042410.2J	BolC04g008120.2J	BolC04g049160.2J
87	BolC06g045850.2J	BolC04g068120.2J	BolC08g017700.2J	BolC05g017540.2J	BolC08g049680.2J	BolC09g059140.2J
88	BolC03g057880.2J	BolC04g007070.2J	BolC06g049530.2J	BolC05g004530.2J	BolC06g019030.2J	BolC01g037890.2J
89	BolC05g011740.2J	BolC04g030740.2J	BolC08g058970.2J	BolC03g004520.2J	BolC06g003860.2J	BolC07g009740.2J
90	BolC09g053160.2J	BolC03g050050.2J	BolC08g030270.2J	BolC03g038980.2J	BolC06g045190.2J	BolC07g004230.2J
91	BolC09g012770.2J	BolC03g060970.2J	BolC06g032130.2J	BolC09g005060.2J	BolC02g032790.2J	BolC09g061580.2J
92	BolC04g003950.2J	BolC01g014110.2J	BolC06g013980.2J	BolC03g054070.2J	BolC02g005120.2J	BolC06g049530.2J
93	BolC03g080650.2J	BolC09g051120.2J	BolC08g055330.2J	BolC08g008650.2J	BolC06g039130.2J	BolC03g022350.2J
94	BolC04g002720.2J	BolC05g018360.2J	BolC09g068110.2J	BolC04g053090.2J	BolC01g028220.2J	BolC09g028200.2J
95	BolC07g025770.2J	BolC09g014850.2J	BolC08g030320.2J	BolC04g002420.2J	BolC04g040120.2J	BolC08g047530.2J
96	BolC07g013630.2J	BolC09g051640.2J	BolC05g030220.2J	BolC04g057260.2J	BolC02g006470.2J	BolC06g000560.2J
97	BolC01g003770.2J	BolC02g048500.2J	BolC07g023440.2J	BolC08g060180.2J	BolC02g035260.2J	BolC09g023050.2J
98	BolC07g025740.2J	BolC03g040210.2J	BolC04g007730.2J	BolC04g043330.2J	BolC06g026480.2J	BolC04g030740.2J
99	BolC08g028470.2J	BolC02g058930.2J	BolC04g048750.2J	BolC04g020520.2J	BolC07g044960.2J	BolC06g015890.2J
100	BolC08g050910.2J	BolC09g051890.2J	BolC07g035550.2J	BolC03g053410.2J	BolC09g068550.2J	BolC09g053140.2J
101	BolC07g042150.2J	BolC05g004160.2J	BolC09g015630.2J	BolC04g061760.2J	BolC08g041690.2J	BolC07g052360.2J
102	BolC08g019580.2J	BolC03g031200.2J	BolC03g035240.2J	BolC08g009210.2J	BolC03g051810.2J	BolC08g005190.2J
103	BolC04g036880.2J	BolC01g001440.2J	BolC02g017540.2J	BolC01g027500.2J	BolC06g005160.2J	BolC09g011710.2J
104	BolC02g058900.2J	BolC01g027500.2J	BolC08g047530.2J	BolC01g053740.2J	BolC08g012560.2J	BolC07g050150.2J
105	BolC07g023440.2J	BolC01g055480.2J	BolC07g051790.2J	BolC02g001420.2J	BolC04g040370.2J	BolC01g051040.2J
106	BolC03g021810.2J	BolC05g005020.2J	BolC07g045210.2J	BolC03g019970.2J	BolC07g002510.2J	BolC02g027830.2J
107	BolC02g052720.2J	BolC04g000530.2J	BolC01g001710.2J	BolC01g045170.2J	BolC06g003890.2J	BolC03g060970.2J
108	BolC06g007260.2J	BolC07g007450.2J	BolC01g057540.2J	BolC07g031930.2J	BolC03g041930.2J	BolC02g011540.2J
109	BolC02g024610.2J	BolC09g006740.2J	BolC06g049060.2J	BolC07g044950.2J	BolC01g055580.2J	BolC02g060460.2J
110	BolC06g042130.2J	BolC06g001970.2J	BolC06g017030.2J	BolC02g040000.2J	BolC06g031680.2J	BolC05g015860.2J
111	BolC09g012830.2J	BolC03g052550.2J	BolC09g025380.2J	BolC08g012800.2J	BolC07g035680.2J	BolC07g046760.2J
112	BolC03g013650.2J	BolC05g042440.2J	BolC08g005190.2J	BolC08g039650.2J	BolC03g006940.2J	BolC04g061450.2J
113	BolC02g006470.2J	BolC09g004540.2J	BolC04g061450.2J	BolC07g054910.2J	BolC03g040500.2J	BolC05g004160.2J
114	BolC04g061880.2J	BolC03g007770.2J	BolC03g086700.2J	BolC04g000490.2J	BolC04g014210.2J	BolC06g035610.2J
115	BolC01g014010.2J	BolC08g048980.2J	BolC09g003510.2J	BolC03g075850.2J	BolC07g015020.2J	BolC02g035330.2J
116	BolC03g032200.2J	BolC08g036360.2J	BolC08g003890.2J	BolC07g044310.2J	BolC07g019340.2J	BolC02g034070.2J
117	BolC05g011710.2J	BolC05g026630.2J	BolC02g032050.2J	BolC07g046020.2J	BolC07g030340.2J	BolC06g021690.2J
118	BolC01g003780.2J	BolC02g055370.2J	BolC07g011400.2J	BolC08g009020.2J	BolC08g021540.2J	BolC06g051130.2J
119	BolC01g053800.2J	BolC09g025550.2J	BolC08g046210.2J	BolC08g041750.2J	BolC03g001420.2J	BolC02g006560.2J
120	BolC04g041300.2J	BolC03g066110.2J	BolC04g035520.2J	BolC05g017100.2J	BolC08g042840.2J	BolC05g007000.2J
121	BolC01g000770.2J	BolC06g041490.2J	BolC07g022250.2J	BolC06g032810.2J	BolC09g062910.2J	BolC05g026610.2J
122	BolC02g028890.2J	BolC02g061110.2J	BolC07g021790.2J	BolC05g018910.2J	BolC08g056990.2J	BolC08g048280.2J
123	BolC01g004090.2J	BolC06g051130.2J	BolC05g051420.2J	BolC02g035260.2J	BolC06g050730.2J	BolC04g030170.2J
124	BolC04g001200.2J	BolC02g010500.2J	BolC07g011440.2J	BolC08g008840.2J	BolC06g028460.2J	BolC09g029160.2J
125	BolC07g035200.2J	BolC07g003250.2J	BolC04g049160.2J	BolC09g069260.2J	BolC08g013460.2J	BolC02g023310.2J
126	BolC07g011390.2J	BolC04g000460.2J	BolC08g046280.2J	BolC06g025150.2J	BolC07g026020.2J	BolC08g007530.2J
127	BolC08g050760.2J	BolC05g030730.2J	BolC03g073280.2J	BolC01g047910.2J	BolC09g042410.2J	BolC06g002920.2J
128	BolC05g062150.2J	BolC04g034660.2J	BolC04g061280.2J	BolC08g036290.2J	BolC05g001630.2J	BolC04g007180.2J
129	BolC01g051950.2J	BolC03g022330.2J	BolC04g055840.2J	BolC03g033560.2J	BolC05g062900.2J	BolC05g009020.2J
130	BolC06g030300.2J	BolC07g054430.2J	BolC05g055040.2J	BolC01g020520.2J	BolC06g050290.2J	BolC02g058930.2J
131	BolC03g045450.2J	BolC03g080100.2J	BolC04g051550.2J	BolC06g044930.2J	BolC09g014040.2J	BolC05g057070.2J
132	BolC04g014210.2J	BolC03g051660.2J	BolC04g040430.2J	BolC08g059810.2J	BolC02g058850.2J	BolC01g019320.2J
133	BolC08g049680.2J	BolC06g009100.2J	BolC03g031770.2J	BolC02g032670.2J	BolC04g008170.2J	BolC07g033830.2J
134	BolC04g023060.2J	BolC05g040500.2J	BolC01g022890.2J	BolC06g048080.2J	BolC06g009550.2J	BolC03g035240.2J
135	BolC07g011430.2J	BolC02g050010.2J	BolC02g014480.2J	BolC01g005320.2J	BolC03g085320.2J	BolC03g080540.2J
136	BolC07g042080.2J	BolC02g059060.2J	BolC07g039340.2J	BolC03g012740.2J	BolC08g042350.2J	BolC05g005020.2J
137	BolC03g083080.2J	BolC09g060640.2J	BolC09g040870.2J	BolC07g057070.2J	BolC01g043190.2J	BolC03g064830.2J
138	BolC09g002730.2J	BolC09g014710.2J	BolC05g052050.2J	BolC03g006630.2J	BolC04g020520.2J	BolC03g043510.2J
139	BolC07g014080.2J	BolC01g014740.2J	BolC07g033830.2J	BolC04g061530.2J	BolC02g038700.2J	BolC07g057420.2J
140	BolC03g001340.2J	BolC03g000430.2J	BolC09g000880.2J	BolC02g000640.2J	BolC09g012770.2J	BolC08g044630.2J
141	BolC01g046590.2J	BolC08g044630.2J	BolC05g050050.2J	BolC02g003930.2J	BolC04g003950.2J	BolC08g014160.2J
142	BolC01g036110.2J	BolC09g022370.2J	BolC09g027190.2J	BolC08g009190.2J	BolC01g050320.2J	BolC03g022000.2J
143	BolC04g017420.2J	BolC01g019320.2J	BolC06g015890.2J	BolC02g055100.2J	BolC08g009190.2J	BolC09g064190.2J
144	BolC01g043190.2J	BolC07g041680.2J	BolC02g038200.2J	BolC09g051820.2J	BolC02g009410.2J	BolC05g030220.2J
145	BolC05g005280.2J	BolC09g053720.2J	BolC09g061890.2J	BolC06g024990.2J	BolC01g004240.2J	BolC04g005400.2J
146	BolC07g030340.2J	BolC07g053310.2J	BolC05g031360.2J	BolC01g038480.2J	BolC08g059810.2J	BolC03g007770.2J
147	BolC01g015030.2J	BolC07g037350.2J	BolC08g042790.2J	BolC06g048090.2J	BolC08g009210.2J	BolC05g055040.2J
148	BolC04g063540.2J	BolC03g016170.2J	BolC08g000800.2J	BolC04g021380.2J	BolC07g049130.2J	BolC08g019450.2J
149	BolC09g022600.2J	BolC03g085030.2J	BolC07g038580.2J	BolC03g069640.2J	BolC03g004550.2J	BolC01g011940.2J
150	BolC06g033450.2J	BolC05g061290.2J	BolC01g011940.2J	BolC03g004620.2J	BolC08g000140.2J	BolC07g051860.2J
151	BolC03g001420.2J	BolC02g051350.2J	BolC01g014490.2J	BolC05g060470.2J	BolC05g013420.2J	BolC04g000530.2J
152	BolC05g019840.2J	BolC05g012400.2J	BolC01g010560.2J	BolC08g040100.2J	BolC06g002810.2J	BolC03g006710.2J
153	BolC08g050740.2J	BolC08g028430.2J	BolC07g028870.2J	BolC07g058440.2J	BolC07g036580.2J	BolC06g005150.2J
154	BolC02g007270.2J	BolC06g026360.2J	BolC03g040720.2J	BolC05g054210.2J	BolC07g059450.2J	BolC09g011690.2J
155	BolC06g015700.2J	BolC08g057720.2J	BolC07g056160.2J	BolC09g030940.2J	BolC01g041270.2J	BolC07g041560.2J
156	BolC01g055580.2J	BolC07g057380.2J	BolC05g016380.2J	BolC03g080780.2J	BolC01g002300.2J	BolC09g011700.2J
157	BolC07g019150.2J	BolC07g019710.2J	BolC04g006390.2J	BolC04g048960.2J	BolC09g002730.2J	BolC05g029320.2J
158	BolC03g001270.2J	BolC06g008050.2J	BolC08g045410.2J	BolC07g002510.2J	BolC04g047610.2J	BolC01g001440.2J
159	BolC01g004810.2J	BolC04g067570.2J	BolC09g051160.2J	BolC03g082610.2J	BolC05g063490.2J	BolC02g055370.2J
160	BolC04g011190.2J	BolC03g075190.2J	BolC04g047760.2J	BolC09g027770.2J	BolC05g056870.2J	BolC02g015600.2J
161	BolC02g005880.2J	BolC03g054070.2J	BolC04g048770.2J	BolC06g027950.2J	BolC07g033720.2J	BolC03g086220.2J
162	BolC03g086020.2J	BolC01g003030.2J	BolC03g008870.2J	BolC01g052650.2J	BolC03g057880.2J	BolC01g005090.2J
163	BolC01g047370.2J	BolC02g032050.2J	BolC01g047700.2J	BolC08g030300.2J	BolC05g030250.2J	BolC06g042740.2J
164	BolC02g037140.2J	BolC09g063530.2J	BolC01g019460.2J	BolC08g030250.2J	BolC05g059770.2J	BolC07g056200.2J
165	BolC06g050600.2J	BolC07g042430.2J	BolC02g009430.2J	BolC01g033770.2J	BolC08g046160.2J	BolC07g056160.2J
166	BolC04g002430.2J	BolC09g061580.2J	BolC05g006280.2J	BolC08g056950.2J	BolC07g037670.2J	BolC07g026860.2J
167	BolC07g006980.2J	BolC08g024860.2J	BolC02g041240.2J	BolC05g058250.2J	BolC03g022080.2J	BolC03g002510.2J
168	BolC02g031450.2J	BolC05g061600.2J	BolC02g041410.2J	BolC05g018360.2J	BolC09g062790.2J	BolC03g017210.2J
169	BolC09g037590.2J	BolC09g027600.2J	BolC04g019310.2J	BolC03g071570.2J	BolC03g072090.2J	BolC02g010980.2J
170	BolC08g037460.2J	BolC02g023310.2J	BolC04g060620.2J	BolC02g035120.2J	BolC03g045450.2J	BolC08g040790.2J
171	BolC04g016930.2J	BolC01g007930.2J	BolC09g038180.2J	BolC09g008730.2J	BolC04g066670.2J	BolC04g060650.2J
172	BolC03g038570.2J	BolC08g022230.2J	BolC07g053660.2J	BolC04g007490.2J	BolC07g029010.2J	BolC06g017390.2J
173	BolC07g011400.2J	BolC01g009670.2J	BolC06g017730.2J	BolC03g011740.2J	BolC01g004270.2J	BolC04g006110.2J
174	BolC05g056510.2J	BolC06g039840.2J	BolC02g047020.2J	BolC07g034530.2J	BolC01g053740.2J	BolC09g066690.2J
175	BolC08g000140.2J	BolC04g000890.2J	BolC03g071620.2J	BolC02g061150.2J	BolC03g005920.2J	BolC01g006770.2J
176	BolC07g011440.2J	BolC03g018820.2J	BolC05g026610.2J	BolC01g053240.2J	BolC03g012740.2J	BolC01g050400.2J
177	BolC08g023010.2J	BolC07g052360.2J	BolC01g048400.2J	BolC03g039070.2J	BolC08g012800.2J	BolC09g055990.2J
178	BolC06g020660.2J	BolC07g042710.2J	BolC09g022410.2J	BolC06g044170.2J	BolC01g037350.2J	BolC07g038580.2J
179	BolC09g014040.2J	BolC07g057420.2J	BolC05g002040.2J	BolC02g026780.2J	BolC01g051950.2J	BolC05g007100.2J
180	BolC04g021640.2J	BolC07g032350.2J	BolC08g000640.2J	BolC01g036970.2J	BolC03g071350.2J	BolC03g001300.2J
181	BolC02g046100.2J	BolC03g029380.2J	BolC05g013620.2J	BolC08g053260.2J	BolC05g057680.2J	BolC05g007550.2J
182	BolC03g056260.2J	BolC05g031250.2J	BolC02g052990.2J	BolC07g042710.2J	BolC07g052660.2J	BolC05g060810.2J
183	BolC05g059590.2J	BolC04g067930.2J	BolC08g038710.2J	BolC03g041930.2J	BolC03g086250.2J	BolC05g005340.2J
184	BolC02g005910.2J	BolC07g051860.2J	BolC01g008130.2J	BolC06g002810.2J	BolC01g041320.2J	BolC09g032310.2J
185	BolC03g022080.2J	BolC08g002590.2J	BolC06g019110.2J	BolC08g016130.2J	BolC05g054940.2J	BolC06g046910.2J
186	BolC04g045600.2J	BolC02g057300.2J	BolC05g006140.2J	BolC03g031120.2J	BolC08g019810.2J	BolC06g009640.2J
187	BolC04g061760.2J	BolC03g034890.2J	BolC02g032350.2J	BolC05g060220.2J	BolC07g028140.2J	BolC06g030120.2J
188	BolC02g011200.2J	BolCnng002410.2J	BolC05g055570.2J	BolC05g011690.2J	BolC06g043530.2J	BolC05g055430.2J
189	BolC01g001480.2J	BolC08g038900.2J	BolC08g009080.2J	BolC03g014800.2J	BolC05g017540.2J	BolC03g022330.2J
190	BolC09g006950.2J	BolC05g014430.2J	BolC07g036550.2J	BolC03g028860.2J	BolC02g011200.2J	BolC03g072020.2J
191	BolC03g023940.2J	BolC05g017100.2J	BolC01g023390.2J	BolC09g058690.2J	BolC05g063480.2J	BolC01g024000.2J
192	BolC04g017410.2J	BolC03g013830.2J	BolC03g017450.2J	BolC07g041150.2J	BolC05g018910.2J	BolC05g011260.2J
193	BolC09g007310.2J	BolC04g067500.2J	BolC03g051410.2J	BolC08g025260.2J	BolC01g045170.2J	BolC06g018800.2J
194	BolC07g035420.2J	BolC04g008100.2J	BolC03g055880.2J	BolC08g002370.2J	BolC02g038740.2J	BolC05g038680.2J
195	BolC04g066060.2J	BolC02g017950.2J	BolC03g016870.2J	BolC01g000820.2J	BolC03g033560.2J	BolC01g021470.2J
196	BolC07g029300.2J	BolC01g004780.2J	BolC02g009610.2J	BolC01g049840.2J	BolC02g055060.2J	BolC02g027870.2J
197	BolC01g005070.2J	BolC08g020610.2J	BolC08g039670.2J	BolC02g053840.2J	BolC02g050730.2J	BolC09g011810.2J
198	BolC08g021540.2J	BolC03g035640.2J	BolC08g017500.2J	BolC07g032670.2J	BolC09g054140.2J	BolC07g038900.2J
199	BolC01g012610.2J	BolC07g046190.2J	BolC08g046020.2J	BolC01g009290.2J	BolC05g000400.2J	BolC03g082860.2J
200	BolC05g031400.2J	BolC04g007490.2J	BolC07g031380.2J	BolC06g012110.2J	BolC04g004150.2J	BolC05g031250.2J
201	BolC09g053850.2J	BolC06g018800.2J	BolC09g055360.2J	BolC02g058400.2J	BolC05g059590.2J	BolC03g003690.2J
202	BolC09g029090.2J	BolC07g022300.2J	BolC05g006420.2J	BolC05g019930.2J	BolC06g035570.2J	BolC07g041870.2J
203	BolC04g064880.2J	BolC01g048400.2J	BolC09g064180.2J	BolC09g060720.2J	BolC02g040000.2J	BolC04g059640.2J
204	BolC04g056870.2J	BolC02g036930.2J	BolC06g027060.2J	BolC05g057970.2J	BolC09g064360.2J	BolC09g060640.2J
205	BolC09g018230.2J	BolC01g004080.2J	BolC04g023060.2J	BolC05g050490.2J	BolC03g066850.2J	BolC08g014410.2J
206	BolC06g026480.2J	BolC03g064050.2J	BolC09g010920.2J	BolC01g001630.2J	BolC07g059960.2J	BolC04g031550.2J
207	BolC06g007290.2J	BolC05g005340.2J	BolC08g013870.2J	BolC01g015130.2J	BolC02g007280.2J	BolC01g008250.2J
208	BolC08g040290.2J	BolC05g039760.2J	BolC04g042160.2J	BolC04g054470.2J	BolC08g005330.2J	BolC03g050430.2J
209	BolC09g021670.2J	BolC01g013040.2J	BolC05g057070.2J	BolC03g014840.2J	BolC05g011690.2J	BolC09g035880.2J
210	BolC05g010580.2J	BolC04g044890.2J	BolC08g045180.2J	BolC01g003670.2J	BolC09g052180.2J	BolC06g000930.2J
211	BolC07g034200.2J	BolC04g054520.2J	BolC08g017710.2J	BolC04g025520.2J	BolC07g038460.2J	BolC09g022480.2J
212	BolC05g051480.2J	BolC03g055170.2J	BolC03g046240.2J	BolC09g062870.2J	BolC02g063290.2J	BolC08g044130.2J
213	BolC04g016960.2J	BolC02g055960.2J	BolC02g010980.2J	BolC04g051040.2J	BolC03g076290.2J	BolC08g018980.2J
214	BolC06g039130.2J	BolC09g022480.2J	BolC08g024560.2J	BolC04g030420.2J	BolC08g060670.2J	BolC03g064050.2J
215	BolC09g000770.2J	BolC02g026460.2J	BolC08g024550.2J	BolC06g041490.2J	BolC03g084990.2J	BolC08g058970.2J
216	BolC04g000920.2J	BolC09g024390.2J	BolC09g005010.2J	BolC05g023370.2J	BolC06g044830.2J	BolC03g028360.2J
217	BolC01g030120.2J	BolC04g033410.2J	BolC02g014710.2J	BolC08g038670.2J	BolC02g000290.2J	BolC03g028120.2J
218	BolC04g008480.2J	BolC08g028960.2J	BolC05g018270.2J	BolC09g052520.2J	BolC01g001480.2J	BolC01g044450.2J
219	BolC05g033580.2J	BolC04g020410.2J	BolC07g041730.2J	BolC03g031200.2J	BolC06g027950.2J	BolC09g018020.2J
220	BolC03g085930.2J	BolC05g017040.2J	BolC09g061260.2J	BolC09g026650.2J	BolC02g011250.2J	BolC08g057720.2J
221	BolC03g036100.2J	BolC06g037540.2J	BolC06g048670.2J	BolC05g007940.2J	BolC03g005780.2J	BolC02g063510.2J
222	BolC02g033700.2J	BolC05g061540.2J	BolC06g045920.2J	BolC03g001180.2J	BolC07g060670.2J	BolC06g046620.2J
223	BolC08g055730.2J	BolC09g064430.2J	BolC01g051040.2J	BolC07g045030.2J	BolC06g040990.2J	BolC05g015230.2J
224	BolC06g035980.2J	BolCnng000940.2J	BolC04g062500.2J	BolC08g022120.2J	BolC05g063460.2J	BolC09g061260.2J
225	BolC08g056990.2J	BolC01g006500.2J	BolC04g035270.2J	BolC01g051630.2J	BolC08g025260.2J	BolC08g035660.2J
226	BolC08g028590.2J	BolC04g014120.2J	BolC05g017480.2J	BolC03g029680.2J	BolC09g007310.2J	BolC06g001970.2J
227	BolC09g005150.2J	BolC05g059780.2J	BolC08g049080.2J	BolC05g005280.2J	BolC07g034200.2J	BolC07g030130.2J
228	BolC04g063550.2J	BolC01g004850.2J	BolC01g036290.2J	BolC02g016660.2J	BolC01g052910.2J	BolC06g034510.2J
229	BolC09g061610.2J	BolC01g032360.2J	BolC09g038330.2J	BolC05g047830.2J	BolC07g013700.2J	BolC05g042440.2J
230	BolC06g036000.2J	BolC08g030300.2J	BolC07g038110.2J	BolC05g015710.2J	BolC07g045030.2J	BolC08g037920.2J
231	BolC01g046310.2J	BolC08g030250.2J	BolC08g010110.2J	BolC05g002260.2J	BolC04g008480.2J	BolC04g035520.2J
232	BolC04g014670.2J	BolC08g036930.2J	BolC08g019040.2J	BolC03g080450.2J	BolC01g051630.2J	BolC08g033060.2J
233	BolC02g004040.2J	BolC07g000610.2J	BolC07g043440.2J	BolC03g082290.2J	BolC07g057070.2J	BolC07g057380.2J
234	BolC07g014940.2J	BolC06g024440.2J	BolC06g048810.2J	BolC03g014470.2J	BolC02g001690.2J	BolC05g027270.2J
235	BolC07g038460.2J	BolC08g050190.2J	BolC06g013910.2J	BolC05g027600.2J	BolC03g056320.2J	BolC06g005590.2J
236	BolC07g057010.2J	BolC05g042840.2J	BolC03g073550.2J	BolC09g032860.2J	BolC01g038480.2J	BolC02g010700.2J
237	BolC01g054020.2J	BolC07g041150.2J	BolC06g030210.2J	BolC04g016950.2J	BolC02g005150.2J	BolC06g011780.2J
238	BolC03g085220.2J	BolC09g008590.2J	BolC07g016740.2J	BolC06g045190.2J	BolC05g020870.2J	BolC06g021750.2J
239	BolC02g044770.2J	BolC01g000420.2J	BolC03g066710.2J	BolC08g048980.2J	BolC02g004510.2J	BolC04g014120.2J
240	BolC05g062390.2J	BolC03g047310.2J	BolC09g066690.2J	BolC05g012970.2J	BolC04g051020.2J	BolC05g063020.2J
241	BolC05g049210.2J	BolC08g030340.2J	BolC07g009970.2J	BolC01g056660.2J	BolC01g034280.2J	BolC04g061280.2J
242	BolC02g017970.2J	BolC08g014160.2J	BolC03g017540.2J	BolC01g048570.2J	BolC05g053100.2J	BolC07g047150.2J
243	BolC09g062910.2J	BolC08g010880.2J	BolC03g015840.2J	BolC01g054640.2J	BolC04g000800.2J	BolC09g006740.2J
244	BolC05g056970.2J	BolC03g016360.2J	BolC09g028530.2J	BolC07g046950.2J	BolC09g002480.2J	BolC06g031980.2J
245	BolC03g054390.2J	BolC08g030290.2J	BolC06g007290.2J	BolC05g003120.2J	BolC09g046110.2J	BolC02g001270.2J
246	BolC07g024820.2J	BolC03g072570.2J	BolC03g015860.2J	BolC03g040210.2J	BolC06g020660.2J	BolC03g017470.2J
247	BolC04g011830.2J	BolC08g018470.2J	BolC09g011880.2J	BolC05g019180.2J	BolC09g010480.2J	BolC03g024180.2J
248	BolC08g041480.2J	BolC03g035130.2J	BolC06g015880.2J	BolC07g037170.2J	BolC01g021510.2J	BolC04g044050.2J
249	BolC02g044010.2J	BolC09g007280.2J	BolC02g023760.2J	BolC09g056940.2J	BolC08g029800.2J	BolC05g021030.2J
250	BolC06g003820.2J	BolC03g017810.2J	BolC03g066970.2J	BolCnng006090.2J	BolC04g011190.2J	BolC04g051420.2J
251	BolC04g018530.2J	BolC02g002030.2J	BolC09g021670.2J	BolC04g056510.2J	BolC08g025810.2J	BolC08g044920.2J
252	BolC01g039580.2J	BolC03g043820.2J	BolC05g045810.2J	BolC06g024550.2J	BolC01g009290.2J	BolC03g014960.2J
253	BolC04g043060.2J	BolC08g036370.2J	BolCnng002220.2J	BolC03g002820.2J	BolC01g015130.2J	BolC07g020630.2J
254	BolC08g057790.2J	BolC09g012900.2J	BolC03g016450.2J	BolC09g025550.2J	BolC09g002940.2J	BolC09g045470.2J
255	BolC07g018480.2J	BolC05g055430.2J	BolC05g052270.2J	BolC07g042300.2J	BolC03g066840.2J	BolC08g057680.2J
256	BolC09g010860.2J	BolC02g010700.2J	BolC07g011390.2J	BolC05g054700.2J	BolC08g041480.2J	BolC08g002590.2J
257	BolC09g001010.2J	BolC07g046760.2J	BolC02g037070.2J	BolC02g054870.2J	BolC09g006950.2J	BolC03g052550.2J
258	BolC09g031140.2J	BolC07g004230.2J	BolC05g011260.2J	BolC04g044850.2J	BolC03g040510.2J	BolC03g034090.2J
259	BolC02g056560.2J	BolC05g027270.2J	BolC07g009740.2J	BolC05g061290.2J	BolC04g064880.2J	BolC08g002850.2J
260	BolC08g019810.2J	BolC09g007980.2J	BolC07g051610.2J	BolC03g014380.2J	BolC09g002400.2J	BolC09g055370.2J
261	BolC02g027400.2J	BolC09g055720.2J	BolC06g035950.2J	BolC07g032110.2J	BolC09g023910.2J	BolC08g048800.2J
262	BolC08g039100.2J	BolC06g006260.2J	BolC08g032500.2J	BolC03g017340.2J	BolC06g019440.2J	BolC04g051850.2J
263	BolC03g079120.2J	BolC02g015310.2J	BolC02g045140.2J	BolC06g037220.2J	BolCnng005260.2J	BolC03g051660.2J
264	BolC09g013360.2J	BolC08g039620.2J	BolC06g016180.2J	BolC05g007240.2J	BolC07g051010.2J	BolC04g038220.2J
265	BolC01g039180.2J	BolC04g043030.2J	BolC04g042400.2J	BolC05g015590.2J	BolC07g048470.2J	BolC08g027980.2J
266	BolC02g032770.2J	BolC03g086760.2J	BolC09g057280.2J	BolC02g050730.2J	BolC03g085220.2J	BolC03g080100.2J
267	BolC04g051880.2J	BolC05g003980.2J	BolC01g003780.2J	BolC01g039180.2J	BolC01g046310.2J	BolC03g066110.2J
268	BolC06g050730.2J	BolC04g001940.2J	BolC08g011080.2J	BolC09g024980.2J	BolC09g062870.2J	BolC06g039860.2J
269	BolC03g021320.2J	BolC01g033950.2J	BolC03g031810.2J	BolC01g036510.2J	BolC05g027600.2J	BolC03g050510.2J
270	BolC04g022400.2J	BolC02g063510.2J	BolC04g066450.2J	BolC08g046430.2J	BolC06g047400.2J	BolC04g062170.2J
271	BolC02g038200.2J	BolC07g022130.2J	BolC05g011610.2J	BolC02g061370.2J	BolC03g034380.2J	BolC03g040720.2J
272	BolC01g028240.2J	BolC08g048800.2J	BolC04g019270.2J	BolC07g037670.2J	BolC06g033580.2J	BolC01g047700.2J
273	BolC05g017020.2J	BolC06g039860.2J	BolC09g069200.2J	BolC02g060240.2J	BolC03g029720.2J	BolC09g063430.2J
274	BolC01g047560.2J	BolC05g058590.2J	BolC01g024000.2J	BolC09g067360.2J	BolC01g041120.2J	BolC02g007850.2J
275	BolC04g062210.2J	BolC04g048750.2J	BolC02g044770.2J	BolC08g041690.2J	BolC05g054510.2J	BolC03g019430.2J
276	BolC09g010480.2J	BolC03g084180.2J	BolC02g016810.2J	BolC03g083240.2J	BolC05g021410.2J	BolC07g036210.2J
277	BolC06g050290.2J	BolC08g035660.2J	BolC07g011430.2J	BolC06g036710.2J	BolC01g012610.2J	BolC04g035270.2J
278	BolC07g059490.2J	BolC04g056080.2J	BolC05g053730.2J	BolC02g023940.2J	BolC07g012220.2J	BolC07g024560.2J
279	BolC05g044540.2J	BolC06g034260.2J	BolC02g049490.2J	BolC02g012680.2J	BolC03g064500.2J	BolC02g041410.2J
280	BolC06g029730.2J	BolC05g010600.2J	BolC07g020630.2J	BolC05g056330.2J	BolC05g020840.2J	BolC07g043430.2J
281	BolC03g018330.2J	BolC02g058700.2J	BolC05g050270.2J	BolC02g030080.2J	BolC04g000790.2J	BolC02g009430.2J
282	BolC01g008100.2J	BolC05g013170.2J	BolC02g012030.2J	BolC02g026730.2J	BolC04g000920.2J	BolC03g013980.2J
283	BolC04g040100.2J	BolC02g019620.2J	BolC01g017850.2J	BolC05g030730.2J	BolC06g050600.2J	BolC02g006000.2J
284	BolC03g021370.2J	BolC03g085330.2J	BolC04g040490.2J	BolC08g019290.2J	BolC04g052780.2J	BolC04g000960.2J
285	BolC04g062360.2J	BolC03g058980.2J	BolC05g038660.2J	BolC06g037400.2J	BolC03g086460.2J	BolC02g017950.2J
286	BolC02g049580.2J	BolC02g035330.2J	BolC06g022280.2J	BolC01g027490.2J	BolC09g025360.2J	BolC03g006430.2J
287	BolC07g035170.2J	BolC01g005090.2J	BolC08g010580.2J	BolC04g054180.2J	BolC04g018830.2J	BolC09g057260.2J
288	BolC03g079080.2J	BolC04g012330.2J	BolC06g028900.2J	BolC09g044010.2J	BolC02g007270.2J	BolC04g000890.2J
289	BolC01g004270.2J	BolC09g052580.2J	BolC04g053830.2J	BolC05g017290.2J	BolC05g052490.2J	BolC04g062000.2J
290	BolC09g020020.2J	BolC08g053510.2J	BolC04g020970.2J	BolC09g016450.2J	BolC04g016950.2J	BolC04g007730.2J
291	BolC03g051690.2J	BolC08g007910.2J	BolC08g057680.2J	BolC08g053410.2J	BolC03g085480.2J	BolC08g028790.2J
292	BolC03g076560.2J	BolC06g033470.2J	BolC09g028200.2J	BolC08g020610.2J	BolC03g017320.2J	BolC08g010110.2J
293	BolC05g002040.2J	BolC04g061350.2J	BolC06g017390.2J	BolC05g059770.2J	BolC03g081140.2J	BolC02g017540.2J
294	BolC04g004150.2J	BolC02g001230.2J	BolC03g013280.2J	BolC02g000530.2J	BolC04g018850.2J	BolC01g014660.2J
295	BolC07g023240.2J	BolC04g062130.2J	BolC03g013350.2J	BolC07g023040.2J	BolC07g024820.2J	BolC05g053930.2J
296	BolC01g013840.2J	BolC05g001480.2J	BolC04g021430.2J	BolC07g008280.2J	BolC08g056510.2J	BolC06g048670.2J
297	BolC03g043120.2J	BolC08g048020.2J	BolC08g049230.2J	BolC01g049610.2J	BolC05g016570.2J	BolC02g012950.2J
298	BolC03g033960.2J	BolC07g012600.2J	BolC03g033410.2J	BolC07g055190.2J	BolC09g046120.2J	BolC02g014710.2J
299	BolC03g056530.2J	BolC04g048960.2J	BolC04g024230.2J	BolC04g002230.2J	BolC08g010670.2J	BolC03g052390.2J
300	BolC02g021600.2J	BolC01g049020.2J	BolC02g004040.2J	BolC04g068090.2J	BolC06g033070.2J	BolC01g024070.2J
301	BolC06g004100.2J	BolC09g020120.2J	BolC04g059640.2J	BolC09g001120.2J	BolC02g049250.2J	BolC03g073280.2J
302	BolC01g002300.2J	BolC03g081260.2J	BolC08g009480.2J	BolC06g046230.2J	BolC01g020520.2J	BolC02g059060.2J
303	BolC04g067510.2J	BolC05g048910.2J	BolC09g063090.2J	BolC09g046630.2J	BolC07g025970.2J	BolC06g022520.2J
304	BolC01g023430.2J	BolC05g060560.2J	BolC07g038900.2J	BolC03g064500.2J	BolC01g003770.2J	BolC04g032420.2J
305	BolC07g013990.2J	BolC06g035610.2J	BolC02g017970.2J	BolC09g062350.2J	BolC08g008650.2J	BolC01g039880.2J
306	BolC05g011480.2J	BolC06g021750.2J	BolC01g026110.2J	BolC01g034300.2J	BolC07g051950.2J	BolC05g016380.2J
307	BolC03g058390.2J	BolC09g044640.2J	BolC08g007540.2J	BolC05g006680.2J	BolC05g023640.2J	BolC03g054960.2J
308	BolC05g056870.2J	BolC01g031750.2J	BolC01g025890.2J	BolC02g051970.2J	BolC03g004520.2J	BolC06g039840.2J
309	BolC09g068550.2J	BolC03g022350.2J	BolC04g010450.2J	BolC06g032550.2J	BolC01g012850.2J	BolC09g003710.2J
310	BolC01g022500.2J	BolC07g007340.2J	BolC01g030710.2J	BolC01g021850.2J	BolC03g086020.2J	BolC01g031440.2J
311	BolC07g016090.2J	BolC07g015990.2J	BolC06g010030.2J	BolC03g001270.2J	BolC02g006930.2J	BolC02g009830.2J
312	BolC09g046200.2J	BolC04g062170.2J	BolC06g045850.2J	BolC08g007060.2J	BolC07g059930.2J	BolC09g058830.2J
313	BolC04g054540.2J	BolC08g032010.2J	BolC09g000770.2J	BolC05g059320.2J	BolC09g033750.2J	BolC04g023180.2J
314	BolC06g029570.2J	BolC05g007000.2J	BolC09g035880.2J	BolC07g016080.2J	BolC04g033660.2J	BolC07g034340.2J
315	BolC02g011250.2J	BolC02g007550.2J	BolC03g014140.2J	BolC02g057300.2J	BolC01g038740.2J	BolC09g007520.2J
316	BolC01g037780.2J	BolC03g072950.2J	BolC06g036000.2J	BolC06g016190.2J	BolC01g028080.2J	BolC04g018340.2J
317	BolC09g066130.2J	BolC01g003590.2J	BolC03g003690.2J	BolC02g050460.2J	BolC05g019930.2J	BolC01g039740.2J
318	BolC03g021900.2J	BolC04g047660.2J	BolC03g072260.2J	BolC02g005930.2J	BolC09g054230.2J	BolC08g038900.2J
319	BolC05g054580.2J	BolC09g048290.2J	BolC06g002320.2J	BolC01g004140.2J	BolC09g060720.2J	BolC09g051040.2J
320	BolC07g041060.2J	BolC09g014750.2J	BolC09g030050.2J	BolC03g056260.2J	BolC03g008060.2J	BolC09g049100.2J
321	BolC05g051440.2J	BolC01g012830.2J	BolC04g023870.2J	BolC07g042270.2J	BolC07g002460.2J	BolC05g056920.2J
322	BolC07g044010.2J	BolC05g058300.2J	BolC05g006410.2J	BolC07g056430.2J	BolC07g011290.2J	BolC05g052270.2J
323	BolC08g027280.2J	BolC07g060240.2J	BolC05g060810.2J	BolC01g050320.2J	BolC08g009020.2J	BolC05g006360.2J
324	BolC07g036580.2J	BolC08g054070.2J	BolC08g013950.2J	BolC09g059850.2J	BolC01g024540.2J	BolC07g046500.2J
325	BolC09g033750.2J	BolC06g020940.2J	BolC04g068730.2J	BolC08g042490.2J	BolC09g057780.2J	BolC01g004820.2J
326	BolC09g051060.2J	BolC08g043120.2J	BolC02g006630.2J	BolC07g033590.2J	BolC07g049120.2J	BolC04g062500.2J
327	BolC08g060670.2J	BolC01g044450.2J	BolC09g006720.2J	BolC09g017580.2J	BolC03g021370.2J	BolC04g043960.2J
328	BolC06g007960.2J	BolC06g049020.2J	BolC08g019880.2J	BolC05g011380.2J	BolC07g041050.2J	BolC05g058940.2J
329	BolC04g055650.2J	BolC04g011300.2J	BolC07g057990.2J	BolC02g004380.2J	BolC09g021310.2J	BolC01g057040.2J
330	BolC04g010280.2J	BolC05g052900.2J	BolC01g000540.2J	BolC08g008630.2J	BolC03g021810.2J	BolC04g063050.2J
331	BolC05g054700.2J	BolC06g020690.2J	BolC07g045160.2J	BolCnng003750.2J	BolC01g047370.2J	BolC03g013830.2J
332	BolC03g041850.2J	BolC03g054960.2J	BolC01g012110.2J	BolC06g000420.2J	BolC02g035440.2J	BolC03g022190.2J
333	BolC01g025900.2J	BolC06g046550.2J	BolC05g062190.2J	BolC02g057360.2J	BolC07g025640.2J	BolC08g020800.2J
334	BolC01g054640.2J	BolC08g039650.2J	BolC06g041170.2J	BolCnng003760.2J	BolC02g058920.2J	BolC07g055690.2J
335	BolC07g012250.2J	BolC09g065980.2J	BolC04g036310.2J	BolC08g005330.2J	BolC08g029770.2J	BolC03g017450.2J
336	BolC02g058100.2J	BolC05g004280.2J	BolC08g027510.2J	BolC03g054060.2J	BolC03g023790.2J	BolC09g021680.2J
337	BolC01g037760.2J	BolC03g028630.2J	BolC06g006790.2J	BolC07g024430.2J	BolC04g040290.2J	BolC06g006300.2J
338	BolC03g073100.2J	BolC07g049600.2J	BolC07g057430.2J	BolC08g052380.2J	BolC07g059400.2J	BolC04g020410.2J
339	BolC01g020060.2J	BolC02g025980.2J	BolC03g063680.2J	BolC05g004890.2J	BolC07g044950.2J	BolC02g043170.2J
340	BolC03g023360.2J	BolC06g003400.2J	BolCnng006120.2J	BolC08g010680.2J	BolC01g023220.2J	BolC08g004180.2J
341	BolC07g045590.2J	BolC09g039710.2J	BolC03g029850.2J	BolC01g018500.2J	BolC06g007960.2J	BolC06g047950.2J
342	BolC02g050460.2J	BolC08g003680.2J	BolC04g062000.2J	BolC05g001650.2J	BolC08g045540.2J	BolC04g011300.2J
343	BolC09g004700.2J	BolC07g058880.2J	BolC03g046090.2J	BolC08g039620.2J	BolC01g016030.2J	BolC01g057540.2J
344	BolC07g035580.2J	BolC09g040750.2J	BolC07g026800.2J	BolC08g008640.2J	BolC05g049210.2J	BolC02g023330.2J
345	BolC03g086700.2J	BolC01g021470.2J	BolC04g045600.2J	BolC07g028040.2J	BolC05g054950.2J	BolC08g024560.2J
346	BolC09g039240.2J	BolC06g046230.2J	BolC04g041070.2J	BolC03g070830.2J	BolC08g041650.2J	BolC02g051350.2J
347	BolC06g035950.2J	BolC08g033090.2J	BolC07g026330.2J	BolC02g026800.2J	BolC07g026580.2J	BolC05g039760.2J
348	BolC02g058850.2J	BolC04g030660.2J	BolC03g064070.2J	BolC07g029010.2J	BolC07g032670.2J	BolC03g070440.2J
349	BolC02g043280.2J	BolC06g043090.2J	BolC02g062450.2J	BolC08g050190.2J	BolC01g049140.2J	BolC09g001990.2J
350	BolC05g011490.2J	BolC07g015930.2J	BolC09g029160.2J	BolC04g000960.2J	BolC09g001010.2J	BolC08g024550.2J
351	BolC08g032820.2J	BolC07g022290.2J	BolC03g074630.2J	BolC07g013680.2J	BolC04g061880.2J	BolC07g035560.2J
352	BolC01g012850.2J	BolC09g032310.2J	BolC01g055610.2J	BolC02g013510.2J	BolC03g061260.2J	BolC05g000620.2J
353	BolC01g000790.2J	BolC07g015890.2J	BolC03g033660.2J	BolC03g086260.2J	BolC06g049330.2J	BolC09g004540.2J
354	BolC03g031120.2J	BolC07g017190.2J	BolC05g008850.2J	BolCnng006410.2J	BolC04g016930.2J	BolC08g028440.2J
355	BolC02g035440.2J	BolC03g064470.2J	BolC07g032290.2J	BolC03g073100.2J	BolC06g000420.2J	BolC09g051770.2J
356	BolC07g021310.2J	BolC07g058140.2J	BolC05g050520.2J	BolC02g048810.2J	BolCnng003750.2J	BolC09g040390.2J
357	BolC09g038510.2J	BolC01g005030.2J	BolC03g086420.2J	BolC08g017080.2J	BolC08g060260.2J	BolC05g031360.2J
358	BolC01g046400.2J	BolC06g030340.2J	BolC07g014210.2J	BolC05g047100.2J	BolC01g054020.2J	BolC09g016260.2J
359	BolC03g077960.2J	BolC04g059360.2J	BolC08g011130.2J	BolC02g055520.2J	BolC09g053160.2J	BolC02g034700.2J
360	BolC03g032490.2J	BolC08g055700.2J	BolC09g001990.2J	BolC06g021670.2J	BolC04g009140.2J	BolC03g016870.2J
361	BolC09g012740.2J	BolC09g052540.2J	BolC05g009250.2J	BolC03g042650.2J	BolC02g004950.2J	BolC01g000730.2J
362	BolC08g049000.2J	BolC07g056740.2J	BolC07g054110.2J	BolC06g038040.2J	BolCnng003760.2J	BolC08g016620.2J
363	BolC09g061890.2J	BolC03g051850.2J	BolC09g001320.2J	BolC08g041520.2J	BolC03g060730.2J	BolC04g030520.2J
364	BolC03g027680.2J	BolC08g015180.2J	BolC02g007850.2J	BolC03g028550.2J	BolC06g015700.2J	BolC03g015080.2J
365	BolC09g014680.2J	BolC05g001720.2J	BolC09g000620.2J	BolC07g024090.2J	BolC06g032550.2J	BolC09g040750.2J
366	BolC03g011670.2J	BolC01g036140.2J	BolC05g062940.2J	BolC04g022400.2J	BolC03g021950.2J	BolC02g031220.2J
367	BolC02g055520.2J	BolC03g002280.2J	BolC08g050580.2J	BolC09g021030.2J	BolC05g003610.2J	BolC09g027190.2J
368	BolC07g016100.2J	BolC05g004570.2J	BolC01g004560.2J	BolC06g046930.2J	BolC07g035200.2J	BolC07g056590.2J
369	BolC03g032590.2J	BolC03g000280.2J	BolC03g020730.2J	BolC05g051630.2J	BolC05g057050.2J	BolC06g042720.2J
370	BolC07g023220.2J	BolC02g011540.2J	BolC03g044180.2J	BolC08g023800.2J	BolC01g018510.2J	BolC09g059040.2J
371	BolC07g040460.2J	BolC07g007350.2J	BolC01g046680.2J	BolC09g060770.2J	BolC08g034300.2J	BolC05g056670.2J
372	BolC01g046580.2J	BolC09g005950.2J	BolC01g004090.2J	BolC02g038570.2J	BolC03g043060.2J	BolC01g004080.2J
373	BolC03g044980.2J	BolC05g054370.2J	BolC03g053670.2J	BolC03g035340.2J	BolC02g055100.2J	BolC02g052990.2J
374	BolC05g030250.2J	BolC01g005660.2J	BolC04g056840.2J	BolC08g034300.2J	BolC06g015300.2J	BolC07g046550.2J
375	BolC07g051250.2J	BolC07g016230.2J	BolC03g052040.2J	BolC09g029630.2J	BolC08g037460.2J	BolC05g051180.2J
376	BolC06g036070.2J	BolC03g024250.2J	BolC01g004460.2J	BolC02g024320.2J	BolC09g008730.2J	BolC05g030190.2J
377	BolC03g020730.2J	BolC01g039740.2J	BolC01g014640.2J	BolC06g023430.2J	BolC05g020260.2J	BolC07g011690.2J
378	BolC08g047770.2J	BolC01g001910.2J	BolC01g033300.2J	BolC03g057120.2J	BolC05g012730.2J	BolC08g046020.2J
379	BolC02g007180.2J	BolC03g016760.2J	BolC02g044990.2J	BolC01g008400.2J	BolC08g038670.2J	BolC07g045160.2J
380	BolC05g054510.2J	BolC07g046500.2J	BolC07g053260.2J	BolC04g010160.2J	BolC04g020370.2J	BolC05g048880.2J
381	BolC04g005460.2J	BolC01g026040.2J	BolC02g002860.2J	BolC08g060080.2J	BolC03g081960.2J	BolC03g048340.2J
382	BolC03g071560.2J	BolC03g074920.2J	BolC06g034510.2J	BolC01g051710.2J	BolC06g048200.2J	BolC08g024860.2J
383	BolC02g001690.2J	BolC05g055600.2J	BolC05g004820.2J	BolC07g012050.2J	BolC05g002260.2J	BolC02g037070.2J
384	BolC06g043540.2J	BolC01g006740.2J	BolC08g058070.2J	BolC09g031290.2J	BolC05g050220.2J	BolC09g052510.2J
385	BolC03g080250.2J	BolC06g002920.2J	BolC02g031220.2J	BolC01g049140.2J	BolC09g021320.2J	BolC06g016180.2J
386	BolC08g021360.2J	BolC08g044130.2J	BolC03g034800.2J	BolC07g041420.2J	BolC01g046750.2J	BolC09g025380.2J
387	BolC02g016510.2J	BolC09g049100.2J	BolC06g015960.2J	BolC05g010010.2J	BolC09g024190.2J	BolC06g009100.2J
388	BolC04g000790.2J	BolC05g006900.2J	BolC08g040820.2J	BolC07g058740.2J	BolC03g005020.2J	BolC03g035640.2J
389	BolC06g033580.2J	BolC06g040580.2J	BolC09g056610.2J	BolC03g001190.2J	BolC03g021910.2J	BolC02g001640.2J
390	BolC02g032440.2J	BolC05g034170.2J	BolC06g004870.2J	BolC08g026850.2J	BolC02g045680.2J	BolC06g032220.2J
391	BolC08g021470.2J	BolC03g045060.2J	BolC04g043960.2J	BolC03g023640.2J	BolC03g045840.2J	BolC04g061350.2J
392	BolC07g050580.2J	BolC04g008750.2J	BolC07g038650.2J	BolC03g038100.2J	BolC08g032820.2J	BolC08g036930.2J
393	BolC08g044710.2J	BolC08g031010.2J	BolC08g030430.2J	BolC03g071930.2J	BolC03g009240.2J	BolC06g006780.2J
394	BolC07g037820.2J	BolC05g000790.2J	BolC04g022230.2J	BolC07g016030.2J	BolC06g033610.2J	BolC02g020090.2J
395	BolC01g019620.2J	BolC05g050360.2J	BolC01g053080.2J	BolC04g004440.2J	BolC03g038570.2J	BolC01g053660.2J
396	BolC06g009550.2J	BolC05g005950.2J	BolC01g001230.2J	BolC07g059930.2J	BolC02g044340.2J	BolC01g019290.2J
397	BolC08g038710.2J	BolC02g058380.2J	BolC07g022300.2J	BolC08g054140.2J	BolC01g038410.2J	BolC08g032010.2J
398	BolC04g036450.2J	BolC03g072400.2J	BolC09g010860.2J	BolC09g023890.2J	BolC01g002980.2J	BolC05g006420.2J
399	BolC02g044590.2J	BolC02g023330.2J	BolC09g000140.2J	BolC05g050960.2J	BolC06g038040.2J	BolCnng000940.2J
400	BolC05g000380.2J	BolC03g014490.2J	BolC04g062210.2J	BolC05g051610.2J	BolC04g010280.2J	BolC03g034610.2J
401	BolC03g071620.2J	BolC07g059020.2J	BolC08g047340.2J	BolC04g032580.2J	BolC04g020890.2J	BolC05g014430.2J
402	BolC01g048760.2J	BolC05g018030.2J	BolC06g017700.2J	BolC03g009430.2J	BolC02g023450.2J	BolC08g010880.2J
403	BolC09g044470.2J	BolC02g026780.2J	BolC02g030740.2J	BolC05g012850.2J	BolC03g072890.2J	BolC01g053000.2J
404	BolC01g024120.2J	BolC07g046550.2J	BolC09g052320.2J	BolC07g047450.2J	BolC05g011740.2J	BolC01g032820.2J
405	BolC07g005340.2J	BolC05g006720.2J	BolC07g026590.2J	BolC04g001220.2J	BolC08g036290.2J	BolC08g053580.2J
406	BolC01g022250.2J	BolC03g024180.2J	BolC02g058100.2J	BolC04g009270.2J	BolC08g040260.2J	BolC03g055340.2J
407	BolC03g026700.2J	BolC09g063740.2J	BolC03g080650.2J	BolC02g022000.2J	BolC02g050580.2J	BolC09g063990.2J
408	BolC01g040940.2J	BolC06g042490.2J	BolC09g058920.2J	BolC08g056860.2J	BolC06g029690.2J	BolC06g027060.2J
409	BolC04g060360.2J	BolC05g043730.2J	BolC03g019370.2J	BolC02g054020.2J	BolC09g026410.2J	BolC05g059780.2J
410	BolC03g086250.2J	BolC09g031440.2J	BolC03g057710.2J	BolC09g062760.2J	BolC06g017900.2J	BolC05g005260.2J
411	BolC05g020870.2J	BolC04g057320.2J	BolC03g084160.2J	BolC01g004190.2J	BolC03g016890.2J	BolC02g011910.2J
412	BolC03g073520.2J	BolC04g063060.2J	BolC06g042720.2J	BolC02g019520.2J	BolC03g085510.2J	BolC07g041980.2J
413	BolC06g044080.2J	BolC01g040590.2J	BolC04g063810.2J	BolC06g043540.2J	BolC07g027400.2J	BolC08g008220.2J
414	BolC05g057340.2J	BolC09g001100.2J	BolC03g062800.2J	BolC06g045820.2J	BolC04g005950.2J	BolC09g065980.2J
415	BolC09g052180.2J	BolC09g003380.2J	BolC04g057910.2J	BolC03g017790.2J	BolC08g060760.2J	BolC02g059750.2J
416	BolC06g032600.2J	BolC06g028500.2J	BolC05g042170.2J	BolC06g015650.2J	BolC03g078750.2J	BolC02g053670.2J
417	BolC04g053650.2J	BolC03g043510.2J	BolC02g039080.2J	BolC08g051140.2J	BolC08g059820.2J	BolC03g012210.2J
418	BolC08g038700.2J	BolC08g018510.2J	BolC03g070440.2J	BolC03g054970.2J	BolC09g017770.2J	BolC04g012370.2J
419	BolC04g000800.2J	BolC02g027870.2J	BolC05g041090.2J	BolC09g007280.2J	BolC03g078720.2J	BolC02g022220.2J
420	BolC04g034200.2J	BolC04g004460.2J	BolC08g049250.2J	BolC04g040380.2J	BolC02g016720.2J	BolC02g023700.2J
421	BolC09g002770.2J	BolC03g017840.2J	BolC01g026220.2J	BolC04g030900.2J	BolC06g000360.2J	BolC03g084180.2J
422	BolC04g058850.2J	BolC09g057260.2J	BolC08g009260.2J	BolC04g039060.2J	BolC03g078680.2J	BolC05g057700.2J
423	BolC09g001980.2J	BolC04g033710.2J	BolC06g044830.2J	BolC08g010670.2J	BolC03g056550.2J	BolC04g011750.2J
424	BolC07g055300.2J	BolC03g079580.2J	BolC04g007180.2J	BolC02g026460.2J	BolC09g011770.2J	BolC04g024030.2J
425	BolC02g004050.2J	BolC09g001120.2J	BolC07g038670.2J	BolC05g036970.2J	BolC06g014310.2J	BolC01g032360.2J
426	BolC08g046160.2J	BolC06g044040.2J	BolC07g024570.2J	BolC03g086720.2J	BolC04g060360.2J	BolC09g011800.2J
427	BolC05g021020.2J	BolC09g059040.2J	BolC04g017420.2J	BolC03g055170.2J	BolC07g029300.2J	BolC03g033410.2J
428	BolC03g010440.2J	BolC04g005400.2J	BolC08g008220.2J	BolC08g048400.2J	BolC04g014790.2J	BolC05g004280.2J
429	BolC09g046120.2J	BolC09g007780.2J	BolC08g002460.2J	BolC05g061200.2J	BolC01g023430.2J	BolC01g004040.2J
430	BolC01g025890.2J	BolC05g059120.2J	BolC05g005260.2J	BolC04g065130.2J	BolC04g011070.2J	BolC09g050270.2J
431	BolC04g038520.2J	BolC03g036380.2J	BolC08g034320.2J	BolC08g024100.2J	BolC02g059100.2J	BolC01g018030.2J
432	BolC07g041400.2J	BolC02g050590.2J	BolC04g036880.2J	BolC09g046830.2J	BolC08g033520.2J	BolC07g037080.2J
433	BolC05g028840.2J	BolC01g052560.2J	BolC09g016260.2J	BolC05g049710.2J	BolC03g003910.2J	BolC05g018650.2J
434	BolC07g059960.2J	BolC08g025680.2J	BolC09g030080.2J	BolC04g007070.2J	BolC01g008780.2J	BolC02g054520.2J
435	BolC03g046510.2J	BolC04g043330.2J	BolC06g011780.2J	BolC07g033200.2J	BolC05g022110.2J	BolC07g030070.2J
436	BolC03g010160.2J	BolC07g050770.2J	BolC04g004300.2J	BolC01g001540.2J	BolC08g050740.2J	BolC03g072700.2J
437	BolC07g021410.2J	BolC02g023940.2J	BolC05g015230.2J	BolC02g026810.2J	BolC06g048780.2J	BolC03g002020.2J
438	BolC03g043980.2J	BolC03g048300.2J	BolC01g016390.2J	BolC05g017040.2J	BolC05g045460.2J	BolC03g059390.2J
439	BolC04g030420.2J	BolC08g007390.2J	BolC03g031540.2J	BolC04g010610.2J	BolC01g034770.2J	BolC07g024570.2J
440	BolC01g037720.2J	BolC03g035370.2J	BolC05g024470.2J	BolC07g049120.2J	BolC09g040420.2J	BolC08g025710.2J
441	BolC01g020230.2J	BolC04g008970.2J	BolC08g028590.2J	BolC05g020260.2J	BolC01g004810.2J	BolC01g038340.2J
442	BolC02g045720.2J	BolC06g040590.2J	BolC08g022710.2J	BolC04g066670.2J	BolC02g024610.2J	BolC05g043740.2J
443	BolC06g007670.2J	BolC05g058080.2J	BolC07g056200.2J	BolC04g040040.2J	BolC07g023240.2J	BolC02g010260.2J
444	BolC07g013980.2J	BolC03g022000.2J	BolC07g009240.2J	BolC09g052610.2J	BolC04g018060.2J	BolC04g022820.2J
445	BolC02g063070.2J	BolC03g028700.2J	BolC05g028290.2J	BolC03g064470.2J	BolC03g058620.2J	BolC03g033660.2J
446	BolC02g012060.2J	BolC06g047530.2J	BolC06g043110.2J	BolC02g032790.2J	BolC07g042270.2J	BolC07g057430.2J
447	BolC07g000220.2J	BolC03g028120.2J	BolC09g011810.2J	BolC09g010690.2J	BolC08g041270.2J	BolC02g002380.2J
448	BolC06g028460.2J	BolC05g051240.2J	BolC01g002410.2J	BolC03g040100.2J	BolC07g059490.2J	BolC07g053260.2J
449	BolC08g012560.2J	BolC03g066950.2J	BolC03g049940.2J	BolC04g018830.2J	BolC08g027760.2J	BolC08g012750.2J
450	BolC03g006930.2J	BolC09g007110.2J	BolC08g038100.2J	BolC01g028220.2J	BolC04g037110.2J	BolC03g044180.2J
451	BolC02g000290.2J	BolC03g066300.2J	BolC03g078880.2J	BolC05g057170.2J	BolC07g007470.2J	BolC07g007340.2J
452	BolC08g047420.2J	BolC02g040430.2J	BolC02g041300.2J	BolC03g042970.2J	BolC05g010530.2J	BolC04g036830.2J
453	BolC01g033330.2J	BolC03g015620.2J	BolC05g009280.2J	BolC04g043260.2J	BolC02g022470.2J	BolC02g060230.2J
454	BolC02g032790.2J	BolC09g002090.2J	BolC08g012040.2J	BolC04g040370.2J	BolC03g044650.2J	BolC05g003980.2J
455	BolC08g049400.2J	BolC03g069180.2J	BolC05g046410.2J	BolC01g026020.2J	BolC04g021640.2J	BolC05g009280.2J
456	BolC02g049250.2J	BolC01g023160.2J	BolC07g013760.2J	BolC04g018850.2J	BolC07g005970.2J	BolC06g025450.2J
457	BolC01g052910.2J	BolC09g029680.2J	BolC08g042340.2J	BolC02g000270.2J	BolC03g005660.2J	BolC08g039270.2J
458	BolC04g047480.2J	BolC03g005310.2J	BolC05g062140.2J	BolC03g079720.2J	BolC07g053950.2J	BolC03g002280.2J
459	BolC01g008030.2J	BolC03g048280.2J	BolC03g074600.2J	BolC05g016190.2J	BolC04g008710.2J	BolC02g032110.2J
460	BolC04g007910.2J	BolC05g025420.2J	BolC08g023150.2J	BolC03g042400.2J	BolC04g051880.2J	BolC03g032980.2J
461	BolC02g010560.2J	BolC09g062330.2J	BolC05g029320.2J	BolC05g040250.2J	BolC08g050760.2J	BolC08g046280.2J
462	BolC09g041850.2J	BolC03g028160.2J	BolC02g022220.2J	BolC02g004510.2J	BolC03g054100.2J	BolC03g015620.2J
463	BolC01g050320.2J	BolC03g028170.2J	BolC03g013420.2J	BolC02g010480.2J	BolC08g018740.2J	BolC03g016520.2J
464	BolC06g011990.2J	BolC09g057010.2J	BolC03g035470.2J	BolC02g017730.2J	BolC05g000500.2J	BolC07g034690.2J
465	BolC01g028220.2J	BolC03g086720.2J	BolC02g007650.2J	BolC05g016570.2J	BolC03g036330.2J	BolC02g036930.2J
466	BolC02g045390.2J	BolC03g076090.2J	BolC02g031040.2J	BolC04g038420.2J	BolC08g003890.2J	BolC02g023760.2J
467	BolC05g054950.2J	BolC01g024470.2J	BolC08g041110.2J	BolC05g019200.2J	BolC01g020230.2J	BolC06g039360.2J
468	BolC04g012550.2J	BolC05g021100.2J	BolC06g009640.2J	BolC09g000270.2J	BolC01g040850.2J	BolC05g052880.2J
469	BolC09g026300.2J	BolC06g014580.2J	BolC06g022900.2J	BolC05g011760.2J	BolC06g030300.2J	BolC03g035370.2J
470	BolC03g014610.2J	BolC06g039360.2J	BolC09g027180.2J	BolC01g025540.2J	BolC09g044470.2J	BolC06g022370.2J
471	BolC04g055850.2J	BolC03g015290.2J	BolC01g018030.2J	BolC07g041910.2J	BolC09g001700.2J	BolC09g051120.2J
472	BolC09g053870.2J	BolC07g041980.2J	BolC03g017230.2J	BolC04g002400.2J	BolC07g016080.2J	BolC09g046700.2J
473	BolC02g003360.2J	BolC06g048090.2J	BolC06g025010.2J	BolC01g006770.2J	BolC04g004540.2J	BolC04g039770.2J
474	BolC03g059050.2J	BolC06g016820.2J	BolC02g050010.2J	BolC07g025150.2J	BolC07g046020.2J	BolC04g063060.2J
475	BolC01g040850.2J	BolC08g039980.2J	BolC04g031140.2J	BolC05g013050.2J	BolC09g067510.2J	BolC05g055820.2J
476	BolC09g027430.2J	BolC05g001470.2J	BolC07g012250.2J	BolC03g075780.2J	BolC05g056330.2J	BolC03g013280.2J
477	BolC09g051440.2J	BolC08g046430.2J	BolC09g020020.2J	BolC07g043430.2J	BolC08g010680.2J	BolC02g047020.2J
478	BolC04g067750.2J	BolC04g044050.2J	BolC03g056790.2J	BolC03g027990.2J	BolC01g036510.2J	BolC03g013350.2J
479	BolC02g014480.2J	BolC07g019600.2J	BolC06g032000.2J	BolC06g017900.2J	BolC02g019750.2J	BolC03g006140.2J
480	BolC09g066980.2J	BolC08g028790.2J	BolC09g045470.2J	BolC05g022550.2J	BolC03g026110.2J	BolC06g038820.2J
481	BolC06g004460.2J	BolC01g013030.2J	BolC09g047470.2J	BolC08g040260.2J	BolC03g021900.2J	BolC01g005060.2J
482	BolC03g031070.2J	BolC09g064770.2J	BolC04g050940.2J	BolC03g004230.2J	BolC09g021490.2J	BolC07g037810.2J
483	BolC04g056030.2J	BolC01g049030.2J	BolC04g036730.2J	BolC04g025260.2J	BolC08g054840.2J	BolC09g057030.2J
484	BolC02g055060.2J	BolC06g030120.2J	BolC01g010450.2J	BolC09g011090.2J	BolC06g027110.2J	BolC09g027600.2J
485	BolC06g008720.2J	BolC01g015720.2J	BolC03g080500.2J	BolC06g023670.2J	BolC03g085930.2J	BolC06g029190.2J
486	BolC03g051810.2J	BolC01g039880.2J	BolC01g025630.2J	BolC02g006930.2J	BolC07g026120.2J	BolCnng002410.2J
487	BolC05g030960.2J	BolC09g069190.2J	BolC06g021560.2J	BolC08g042350.2J	BolC01g038750.2J	BolC09g055690.2J
488	BolC05g045990.2J	BolC06g046460.2J	BolC05g030450.2J	BolC07g030910.2J	BolC03g050690.2J	BolC06g014580.2J
489	BolC07g041730.2J	BolC05g010210.2J	BolC03g075980.2J	BolC03g049350.2J	BolC02g012090.2J	BolC09g005420.2J
490	BolC08g042720.2J	BolC05g025370.2J	BolC04g038080.2J	BolC06g040690.2J	BolC07g017400.2J	BolC01g010320.2J
491	BolC09g057230.2J	BolC05g014450.2J	BolC02g022290.2J	BolC03g016360.2J	BolC04g040790.2J	BolC02g061690.2J
492	BolC07g008280.2J	BolC04g030770.2J	BolC07g031740.2J	BolC06g004110.2J	BolC07g057000.2J	BolC08g032960.2J
493	BolC08g028760.2J	BolC06g016940.2J	BolC08g002760.2J	BolC03g021680.2J	BolC01g044480.2J	BolC08g032900.2J
494	BolC02g036920.2J	BolC05g017320.2J	BolC02g006000.2J	BolC02g018990.2J	BolC03g046370.2J	BolC03g026130.2J
495	BolC03g060570.2J	BolC09g000270.2J	BolC06g014520.2J	BolC03g079570.2J	BolC03g030900.2J	BolC06g044150.2J
496	BolC04g017810.2J	BolC06g028410.2J	BolC03g035180.2J	BolC02g004950.2J	BolC01g046590.2J	BolC05g048910.2J
497	BolC05g060320.2J	BolC09g068820.2J	BolC03g040200.2J	BolC03g029440.2J	BolC06g016280.2J	BolC08g045800.2J
498	BolC02g043900.2J	BolC09g059140.2J	BolC06g047320.2J	BolC02g054070.2J	BolC05g062680.2J	BolC06g034260.2J
499	BolC09g060710.2J	BolC04g068350.2J	BolC05g027400.2J	BolC02g000310.2J	BolC02g026800.2J	BolC07g045210.2J
500	BolC03g019670.2J	BolC09g007520.2J	BolC05g014760.2J	BolC07g045330.2J	BolC07g041060.2J	BolC09g043290.2J
501	BolC06g016140.2J	BolC03g036130.2J	BolC09g006980.2J	BolC02g001800.2J	BolC05g007880.2J	BolC07g013760.2J
502	BolC09g046110.2J	BolC05g007670.2J	BolC08g045200.2J	BolC09g053720.2J	BolC04g023930.2J	BolC06g044540.2J
503	BolC09g043990.2J	BolC04g044870.2J	BolC03g002510.2J	BolC07g012220.2J	BolC05g030350.2J	BolC08g028960.2J
504	BolC01g046680.2J	BolC01g014660.2J	BolC04g045060.2J	BolC03g034400.2J	BolC03g051690.2J	BolC08g009480.2J
505	BolC08g049960.2J	BolC08g060120.2J	BolC07g060450.2J	BolC02g028100.2J	BolC03g006330.2J	BolC03g017810.2J
506	BolC03g028820.2J	BolC07g030350.2J	BolC07g056590.2J	BolC09g045860.2J	BolC04g055220.2J	BolC06g008050.2J
507	BolC01g013070.2J	BolC06g047690.2J	BolC01g055480.2J	BolC01g052630.2J	BolC06g029300.2J	BolC04g064600.2J
508	BolC07g019340.2J	BolC08g002460.2J	BolC03g007050.2J	BolC07g021580.2J	BolC05g009080.2J	BolC04g008790.2J
509	BolC08g013830.2J	BolC07g015400.2J	BolC05g053130.2J	BolC07g053880.2J	BolC02g056970.2J	BolC03g071830.2J
510	BolC09g049860.2J	BolC06g027570.2J	BolC09g019540.2J	BolC08g060120.2J	BolC09g010690.2J	BolC05g014760.2J
511	BolC04g044860.2J	BolC04g020490.2J	BolC06g042960.2J	BolC07g007000.2J	BolC08g050910.2J	BolC07g035070.2J
512	BolC09g064360.2J	BolC07g041580.2J	BolC09g052650.2J	BolC04g054910.2J	BolC09g063710.2J	BolC07g035020.2J
513	BolC09g030050.2J	BolC04g044140.2J	BolC05g010040.2J	BolC03g058620.2J	BolC01g014010.2J	BolC09g066460.2J
514	BolC07g045760.2J	BolC06g047590.2J	BolC08g019450.2J	BolC03g086770.2J	BolC06g048150.2J	BolC03g085030.2J
515	BolC03g014700.2J	BolC02g058990.2J	BolC05g040930.2J	BolC06g022910.2J	BolC05g004130.2J	BolC04g006390.2J
516	BolC09g062790.2J	BolC01g019780.2J	BolC01g041570.2J	BolC09g057980.2J	BolC03g023360.2J	BolC01g027400.2J
517	BolC03g018990.2J	BolC03g026960.2J	BolC07g054580.2J	BolC04g060370.2J	BolC01g056660.2J	BolC09g016550.2J
518	BolC07g054500.2J	BolC07g013440.2J	BolC02g041590.2J	BolC08g012560.2J	BolC02g052560.2J	BolC07g017780.2J
519	BolC04g034850.2J	BolC04g038650.2J	BolC06g031190.2J	BolC04g049960.2J	BolC02g015140.2J	BolC06g032130.2J
520	BolC08g047810.2J	BolC03g072360.2J	BolC02g059750.2J	BolC03g005690.2J	BolC07g029330.2J	BolC03g077710.2J
521	BolC05g009290.2J	BolC08g025710.2J	BolC04g061340.2J	BolC05g009780.2J	BolC07g015230.2J	BolC03g079060.2J
522	BolC03g063740.2J	BolC04g012590.2J	BolC09g039680.2J	BolC09g055240.2J	BolC07g058740.2J	BolC05g018600.2J
523	BolC08g018030.2J	BolC07g009740.2J	BolC05g014620.2J	BolC03g061720.2J	BolC02g037140.2J	BolC08g000800.2J
524	BolC07g015230.2J	BolC07g017230.2J	BolC01g027000.2J	BolC05g016540.2J	BolC04g036440.2J	BolC04g047430.2J
525	BolC07g033200.2J	BolC04g062330.2J	BolC02g046460.2J	BolC05g029400.2J	BolC01g020060.2J	BolC07g012600.2J
526	BolC03g026670.2J	BolC07g006590.2J	BolC09g031180.2J	BolC02g013600.2J	BolC02g005880.2J	BolC08g036790.2J
527	BolC07g018380.2J	BolC08g025130.2J	BolC07g045090.2J	BolC03g000310.2J	BolC06g021670.2J	BolC02g005820.2J
528	BolC07g055230.2J	BolC06g018380.2J	BolC07g054710.2J	BolC01g025360.2J	BolC09g067450.2J	BolC05g058300.2J
529	BolC01g000100.2J	BolC03g051650.2J	BolC04g012670.2J	BolC09g060780.2J	BolC07g035580.2J	BolC06g031190.2J
530	BolC07g035680.2J	BolC08g030950.2J	BolC09g020390.2J	BolC07g005720.2J	BolC07g055180.2J	BolC02g020170.2J
531	BolC04g064590.2J	BolC07g017780.2J	BolC04g042720.2J	BolC03g013670.2J	BolC01g037830.2J	BolC01g004780.2J
532	BolC05g036600.2J	BolC03g028360.2J	BolC06g041910.2J	BolC08g053510.2J	BolC02g029880.2J	BolC04g054220.2J
533	BolC01g040150.2J	BolC01g022910.2J	BolC06g021400.2J	BolC05g049690.2J	BolC03g057850.2J	BolC09g050390.2J
534	BolC06g041540.2J	BolC04g039680.2J	BolC03g052310.2J	BolC01g027480.2J	BolC05g062390.2J	BolC05g025370.2J
535	BolC02g057570.2J	BolC03g023590.2J	BolC06g036390.2J	BolC08g033610.2J	BolC06g012110.2J	BolC06g046550.2J
536	BolC07g020430.2J	BolC06g032800.2J	BolC06g026270.2J	BolC06g004550.2J	BolC05g022440.2J	BolC01g048080.2J
537	BolC09g002400.2J	BolC06g037670.2J	BolC09g011450.2J	BolC06g041180.2J	BolC09g058690.2J	BolC04g033410.2J
538	BolC01g038740.2J	BolC09g011710.2J	BolC02g032110.2J	BolC08g004100.2J	BolC06g012720.2J	BolC07g042850.2J
539	BolC05g060880.2J	BolC07g035020.2J	BolC06g037320.2J	BolC03g005920.2J	BolC02g049230.2J	BolC02g049490.2J
540	BolC07g034330.2J	BolC07g035070.2J	BolC07g046620.2J	BolC02g035780.2J	BolC08g034210.2J	BolC04g067570.2J
541	BolC02g009380.2J	BolC07g048000.2J	BolC02g027830.2J	BolC03g048330.2J	BolC09g026200.2J	BolC08g022710.2J
542	BolC09g016670.2J	BolC09g066460.2J	BolC08g037920.2J	BolC03g083940.2J	BolC04g002420.2J	BolC09g025160.2J
543	BolC06g040010.2J	BolC07g055690.2J	BolC04g042150.2J	BolC05g032590.2J	BolC03g041990.2J	BolC08g011850.2J
544	BolC07g059450.2J	BolC07g030440.2J	BolC09g056100.2J	BolC09g016720.2J	BolC02g046510.2J	BolC07g051790.2J
545	BolC06g032610.2J	BolC09g035490.2J	BolC03g026320.2J	BolC05g016790.2J	BolC02g049710.2J	BolC09g000620.2J
546	BolC09g041400.2J	BolC09g035590.2J	BolC03g004310.2J	BolC09g061030.2J	BolC01g051930.2J	BolC04g022800.2J
547	BolC02g027190.2J	BolC09g057030.2J	BolC07g018790.2J	BolC03g054480.2J	BolC01g000160.2J	BolC01g004050.2J
548	BolC09g000600.2J	BolC06g047640.2J	BolC05g013480.2J	BolC07g044690.2J	BolC09g037590.2J	BolC08g049650.2J
549	BolC04g028430.2J	BolC08g020850.2J	BolC02g008440.2J	BolC05g053100.2J	BolC02g055530.2J	BolC06g042040.2J
550	BolC06g050400.2J	BolC07g027830.2J	BolC05g050110.2J	BolC01g014110.2J	BolC02g005260.2J	BolC07g054970.2J
551	BolC09g010960.2J	BolCnng003330.2J	BolC05g046070.2J	BolC04g003160.2J	BolC02g058490.2J	BolC05g056840.2J
552	BolC06g032000.2J	BolC06g048290.2J	BolC04g016610.2J	BolC09g067450.2J	BolC06g033590.2J	BolC03g018820.2J
553	BolC07g028140.2J	BolC09g011800.2J	BolC07g047800.2J	BolC06g042350.2J	BolC07g036800.2J	BolC05g007070.2J
554	BolC05g030420.2J	BolC07g047530.2J	BolC08g039930.2J	BolC05g032700.2J	BolC03g018990.2J	BolC09g036220.2J
555	BolC06g012620.2J	BolC05g024020.2J	BolC03g015820.2J	BolC09g060250.2J	BolC08g052560.2J	BolC05g007370.2J
556	BolC06g051200.2J	BolC03g039070.2J	BolC06g012890.2J	BolC07g002490.2J	BolC08g040290.2J	BolC03g085330.2J
557	BolC07g034180.2J	BolC01g040230.2J	BolC03g019800.2J	BolC03g034460.2J	BolC09g063820.2J	BolC05g058080.2J
558	BolC08g007940.2J	BolC09g018020.2J	BolC03g041080.2J	BolC03g017490.2J	BolC03g038980.2J	BolC08g046210.2J
559	BolC04g007310.2J	BolC01g010320.2J	BolC07g020360.2J	BolC07g012010.2J	BolC05g023580.2J	BolC08g046080.2J
560	BolC08g038830.2J	BolC01g004860.2J	BolC07g026490.2J	BolC07g015020.2J	BolC06g010460.2J	BolC09g061230.2J
561	BolC01g037350.2J	BolC03g053530.2J	BolC04g060650.2J	BolC02g003750.2J	BolC09g069020.2J	BolC01g004860.2J
562	BolC02g057270.2J	BolC04g003320.2J	BolC07g026430.2J	BolC06g024640.2J	BolC09g012830.2J	BolC08g010580.2J
563	BolC01g052930.2J	BolC07g047650.2J	BolC02g003780.2J	BolC02g053820.2J	BolC07g005490.2J	BolC08g048020.2J
564	BolC06g051230.2J	BolC05g013030.2J	BolC08g054410.2J	BolC01g037750.2J	BolC07g051220.2J	BolC05g015540.2J
565	BolC01g021510.2J	BolC08g040160.2J	BolC06g004400.2J	BolC08g001920.2J	BolC02g034410.2J	BolC03g009190.2J
566	BolC09g041550.2J	BolC08g030600.2J	BolC01g000640.2J	BolC04g013000.2J	BolC08g034490.2J	BolC04g008100.2J
567	BolC02g011090.2J	BolC02g043640.2J	BolC01g019440.2J	BolC01g010230.2J	BolC06g036070.2J	BolC08g045410.2J
568	BolC07g013680.2J	BolC03g062330.2J	BolC04g016960.2J	BolC01g012830.2J	BolC02g000530.2J	BolC02g062450.2J
569	BolC01g025370.2J	BolC03g024960.2J	BolC07g057840.2J	BolC07g032350.2J	BolC06g033650.2J	BolC07g043440.2J
570	BolC06g033610.2J	BolC01g038340.2J	BolC03g010440.2J	BolC08g036920.2J	BolC07g037260.2J	BolC09g026640.2J
571	BolC07g060450.2J	BolC04g046260.2J	BolC09g067870.2J	BolC03g037570.2J	BolC04g047480.2J	BolC08g058820.2J
572	BolC02g046510.2J	BolC08g018820.2J	BolC09g063750.2J	BolC02g049640.2J	BolC01g032840.2J	BolC03g004630.2J
573	BolC03g021020.2J	BolC04g032310.2J	BolC08g004560.2J	BolC08g042840.2J	BolC09g046200.2J	BolC03g077200.2J
574	BolC05g021550.2J	BolC04g035780.2J	BolC08g032270.2J	BolC09g051640.2J	BolC07g041420.2J	BolC09g004800.2J
575	BolC07g060670.2J	BolC05g035600.2J	BolC01g022900.2J	BolC03g058550.2J	BolC02g001120.2J	BolC07g007450.2J
576	BolC06g007060.2J	BolC04g012400.2J	BolC01g001550.2J	BolC03g042190.2J	BolC02g063070.2J	BolC09g022970.2J
577	BolC09g003790.2J	BolC04g016660.2J	BolC03g010280.2J	BolC02g046170.2J	BolC04g063930.2J	BolC06g014570.2J
578	BolC05g001630.2J	BolC07g037360.2J	BolC03g050510.2J	BolC01g008780.2J	BolC08g000760.2J	BolC02g003460.2J
579	BolC09g006600.2J	BolC04g005000.2J	BolC09g018310.2J	BolC05g001150.2J	BolC02g054930.2J	BolC03g005310.2J
580	BolC03g085320.2J	BolC06g025450.2J	BolC04g051420.2J	BolC02g010790.2J	BolC05g011380.2J	BolC09g005100.2J
581	BolC09g011770.2J	BolC06g048730.2J	BolC01g001500.2J	BolC03g005020.2J	BolC08g053410.2J	BolC09g023150.2J
582	BolC03g081960.2J	BolC05g011780.2J	BolC07g035420.2J	BolC09g006420.2J	BolC08g057090.2J	BolC03g069180.2J
583	BolC02g001120.2J	BolC01g002190.2J	BolC06g026670.2J	BolC01g011550.2J	BolC08g048250.2J	BolC08g040970.2J
584	BolC02g004980.2J	BolC06g049790.2J	BolC09g064190.2J	BolC06g027800.2J	BolC03g010160.2J	BolC09g027180.2J
585	BolC03g001690.2J	BolC07g030130.2J	BolC06g021690.2J	BolC03g035990.2J	BolC07g042080.2J	BolC06g042610.2J
586	BolC02g029340.2J	BolC07g036500.2J	BolC02g060460.2J	BolC03g005780.2J	BolC08g046600.2J	BolC04g067060.2J
587	BolC03g004620.2J	BolC07g045330.2J	BolC02g020170.2J	BolC07g035680.2J	BolC08g008840.2J	BolC07g020360.2J
588	BolC03g061260.2J	BolCnng004900.2J	BolC03g050340.2J	BolC06g019770.2J	BolC07g000220.2J	BolC09g020120.2J
589	BolC05g033130.2J	BolC05g012130.2J	BolC08g055130.2J	BolC07g058370.2J	BolC07g038880.2J	BolC06g044600.2J
590	BolC09g043600.2J	BolC08g057270.2J	BolC09g018100.2J	BolC01g034230.2J	BolC04g041300.2J	BolC03g062330.2J
591	BolC05g004530.2J	BolC04g002460.2J	BolC07g026460.2J	BolC05g061720.2J	BolC06g007060.2J	BolC05g014620.2J
592	BolC03g031810.2J	BolC03g010660.2J	BolC07g035170.2J	BolC09g018110.2J	BolC08g018030.2J	BolC04g044020.2J
593	BolC03g031770.2J	BolC01g002580.2J	BolC08g017480.2J	BolC06g048200.2J	BolC03g067430.2J	BolC06g020450.2J
594	BolC05g060390.2J	BolC03g038720.2J	BolC08g048460.2J	BolC07g040610.2J	BolC05g054580.2J	BolC05g019620.2J
595	BolC06g035660.2J	BolC01g004070.2J	BolC07g026370.2J	BolC07g021310.2J	BolC07g020870.2J	BolC05g011780.2J
596	BolC03g084160.2J	BolC02g030720.2J	BolC08g039790.2J	BolC04g062110.2J	BolC09g067360.2J	BolC07g054580.2J
597	BolC05g037540.2J	BolC03g003860.2J	BolC09g033220.2J	BolC08g022160.2J	BolC09g038820.2J	BolC09g064180.2J
598	BolC08g048250.2J	BolC01g041440.2J	BolC09g005150.2J	BolC03g076290.2J	BolC07g056990.2J	BolC08g056270.2J
599	BolC07g034170.2J	BolC08g018500.2J	BolC05g060390.2J	BolC03g031680.2J	BolC07g038840.2J	BolC03g009070.2J
600	BolC05g049770.2J	BolC09g053710.2J	BolC02g005910.2J	BolC01g020180.2J	BolC03g017890.2J	BolC05g008730.2J
601	BolC06g042560.2J	BolC05g002640.2J	BolC02g046100.2J	BolC01g020860.2J	BolC01g042110.2J	BolC03g050260.2J
602	BolC06g010230.2J	BolC03g042410.2J	BolC07g024560.2J	BolC08g041560.2J	BolC07g045760.2J	BolC06g020940.2J
603	BolC08g055320.2J	BolC05g032600.2J	BolC01g014470.2J	BolC05g032600.2J	BolC03g044630.2J	BolC03g028970.2J
604	BolC03g070680.2J	BolC01g002390.2J	BolC02g053670.2J	BolC07g055720.2J	BolC07g037500.2J	BolC08g048350.2J
605	BolC02g028540.2J	BolC08g045740.2J	BolC05g050670.2J	BolC04g010670.2J	BolC03g073430.2J	BolC03g015840.2J
606	BolC04g051020.2J	BolC07g022780.2J	BolC04g035080.2J	BolC05g007660.2J	BolC01g016770.2J	BolC03g001620.2J
607	BolC01g018780.2J	BolC07g019690.2J	BolC08g012750.2J	BolC04g011180.2J	BolC02g048810.2J	BolC04g005110.2J
608	BolC02g027410.2J	BolC07g033320.2J	BolC09g034020.2J	BolCnng003170.2J	BolC03g017340.2J	BolC03g022220.2J
609	BolC06g034320.2J	BolC04g014360.2J	BolC07g036360.2J	BolC06g023660.2J	BolC07g006980.2J	BolC04g060050.2J
610	BolC08g042840.2J	BolC05g021150.2J	BolC01g040930.2J	BolC07g012110.2J	BolC05g040930.2J	BolC03g015860.2J
611	BolC03g003910.2J	BolC09g051040.2J	BolC06g008260.2J	BolC02g019750.2J	BolC05g011020.2J	BolC09g018100.2J
612	BolC04g008710.2J	BolC01g001510.2J	BolC03g072080.2J	BolC08g033580.2J	BolC03g001320.2J	BolC03g071060.2J
613	BolC04g055840.2J	BolC09g007690.2J	BolC04g066600.2J	BolC02g046180.2J	BolC05g017290.2J	BolC08g036060.2J
614	BolC07g034230.2J	BolC07g017220.2J	BolC01g056840.2J	BolC09g010420.2J	BolC09g022600.2J	BolC09g031330.2J
615	BolC05g022110.2J	BolC04g057100.2J	BolC03g064830.2J	BolC06g008560.2J	BolC09g049860.2J	BolC05g002680.2J
616	BolC07g035150.2J	BolC02g010510.2J	BolC04g001810.2J	BolC02g025770.2J	BolC02g044820.2J	BolC03g056860.2J
617	BolC04g019090.2J	BolC01g053660.2J	BolC09g016550.2J	BolC03g008510.2J	BolC04g058850.2J	BolC09g026030.2J
618	BolC01g000210.2J	BolC09g042240.2J	BolC03g023940.2J	BolC03g029050.2J	BolC01g049840.2J	BolC02g025410.2J
619	BolC04g046330.2J	BolC01g055100.2J	BolC02g056580.2J	BolC01g041120.2J	BolC04g058840.2J	BolC02g055960.2J
620	BolC02g012030.2J	BolC08g031130.2J	BolC09g053860.2J	BolC05g054080.2J	BolC05g056030.2J	BolC04g037830.2J
621	BolC03g041930.2J	BolC04g056010.2J	BolC08g057110.2J	BolC08g026640.2J	BolC02g045550.2J	BolC09g039680.2J
622	BolC05g052870.2J	BolC03g012600.2J	BolC06g044150.2J	BolC06g022080.2J	BolC03g030840.2J	BolC03g058980.2J
623	BolC03g056670.2J	BolC06g041180.2J	BolC03g026130.2J	BolC09g031440.2J	BolC06g033450.2J	BolC05g054280.2J
624	BolC09g024190.2J	BolC04g004700.2J	BolC06g005860.2J	BolC05g000340.2J	BolC09g055240.2J	BolC09g035490.2J
625	BolC01g018070.2J	BolC03g066560.2J	BolC04g014160.2J	BolC02g059800.2J	BolC07g020430.2J	BolC01g032470.2J
626	BolC02g057540.2J	BolC03g016630.2J	BolC05g057360.2J	BolC01g025040.2J	BolC09g064340.2J	BolC03g063680.2J
627	BolC09g039950.2J	BolC09g067840.2J	BolC01g055300.2J	BolC02g048600.2J	BolC05g045990.2J	BolC08g030600.2J
628	BolC05g003610.2J	BolC02g020090.2J	BolC06g046620.2J	BolC03g025920.2J	BolC06g006540.2J	BolC05g017320.2J
629	BolC05g002180.2J	BolC01g037750.2J	BolC09g043670.2J	BolC09g014710.2J	BolC03g061780.2J	BolC03g012600.2J
630	BolC03g018320.2J	BolC01g052200.2J	BolC07g054680.2J	BolC05g005010.2J	BolC09g034530.2J	BolC05g053710.2J
631	BolC06g012720.2J	BolC07g059820.2J	BolC06g002890.2J	BolC04g057930.2J	BolC01g013480.2J	BolC01g019500.2J
632	BolC09g049870.2J	BolC08g013730.2J	BolC09g056110.2J	BolC08g025670.2J	BolC09g028530.2J	BolC03g024250.2J
633	BolC07g043380.2J	BolC03g033800.2J	BolC07g057630.2J	BolC02g010780.2J	BolC02g044460.2J	BolC07g032390.2J
634	BolC07g002460.2J	BolC08g013770.2J	BolC03g055340.2J	BolC08g041440.2J	BolC07g046620.2J	BolC07g036360.2J
635	BolC09g026210.2J	BolC07g060690.2J	BolC03g022660.2J	BolC06g029320.2J	BolC02g057360.2J	BolC07g054430.2J
636	BolC07g034410.2J	BolC07g037810.2J	BolC04g065970.2J	BolC06g045910.2J	BolC08g004100.2J	BolC05g011730.2J
637	BolC03g040500.2J	BolC02g026130.2J	BolC06g041530.2J	BolC09g051860.2J	BolC07g025770.2J	BolC01g050230.2J
638	BolC03g015730.2J	BolC05g002910.2J	BolC03g041550.2J	BolC03g074920.2J	BolC06g044270.2J	BolC05g037930.2J
639	BolC01g021690.2J	BolC09g023050.2J	BolC09g061230.2J	BolC02g059980.2J	BolC03g015380.2J	BolC07g017230.2J
640	BolC07g032530.2J	BolC02g007910.2J	BolC04g068750.2J	BolC08g026470.2J	BolC01g003280.2J	BolC03g007050.2J
641	BolC02g054450.2J	BolC09g062880.2J	BolC05g058460.2J	BolC05g059220.2J	BolC06g004460.2J	BolC06g037220.2J
642	BolC05g021410.2J	BolC04g036830.2J	BolC09g011100.2J	BolC09g006810.2J	BolC09g064110.2J	BolC09g068490.2J
643	BolC01g043470.2J	BolC04g063050.2J	BolC03g066500.2J	BolC03g023840.2J	BolC09g060960.2J	BolC04g068120.2J
644	BolC02g035230.2J	BolC07g021440.2J	BolC03g060140.2J	BolC07g048330.2J	BolC01g006800.2J	BolC05g012400.2J
645	BolC01g019850.2J	BolC03g048330.2J	BolC09g010180.2J	BolC08g060260.2J	BolC07g060110.2J	BolC08g057840.2J
646	BolC03g070390.2J	BolC04g003490.2J	BolC05g062160.2J	BolC05g021100.2J	BolC07g025740.2J	BolC03g072950.2J
647	BolC05g023640.2J	BolC08g041030.2J	BolC09g002610.2J	BolC03g068240.2J	BolC06g039120.2J	BolC01g036290.2J
648	BolC09g002940.2J	BolC06g006300.2J	BolC04g011290.2J	BolC07g025060.2J	BolC09g052610.2J	BolC05g061540.2J
649	BolC02g057910.2J	BolC04g047510.2J	BolC09g011710.2J	BolC01g014130.2J	BolC05g023370.2J	BolC03g080500.2J
650	BolC03g021950.2J	BolC07g012590.2J	BolC06g005590.2J	BolC03g048940.2J	BolC02g045690.2J	BolC06g034980.2J
651	BolC03g002460.2J	BolC06g036510.2J	BolC06g028510.2J	BolC06g032110.2J	BolC05g033130.2J	BolC07g047530.2J
652	BolC08g017500.2J	BolC03g047000.2J	BolC04g008510.2J	BolC07g026580.2J	BolC03g073520.2J	BolC07g022520.2J
653	BolC07g012160.2J	BolC05g002770.2J	BolC04g043920.2J	BolC07g044170.2J	BolC02g013290.2J	BolC02g001230.2J
654	BolC07g037040.2J	BolC08g022220.2J	BolC01g050130.2J	BolC05g027080.2J	BolC04g064050.2J	BolC02g010320.2J
655	BolC08g052330.2J	BolC03g033950.2J	BolC04g063550.2J	BolC03g069720.2J	BolC01g034230.2J	BolC08g015180.2J
656	BolC02g046230.2J	BolC06g006600.2J	BolC09g046700.2J	BolC04g057240.2J	BolC08g046870.2J	BolC08g036370.2J
657	BolC06g034090.2J	BolC09g025160.2J	BolC05g050390.2J	BolC09g009150.2J	BolC06g051060.2J	BolC01g018340.2J
658	BolC02g054690.2J	BolC03g024500.2J	BolC07g055530.2J	BolC02g061570.2J	BolC02g061570.2J	BolC07g007350.2J
659	BolC09g005060.2J	BolC08g049280.2J	BolC07g046200.2J	BolC07g025390.2J	BolC05g058250.2J	BolC01g004560.2J
660	BolC05g063800.2J	BolC01g057640.2J	BolC04g020940.2J	BolC07g036800.2J	BolC09g000370.2J	BolC03g028990.2J
661	BolC07g020870.2J	BolC02g030700.2J	BolC03g042300.2J	BolC09g007980.2J	BolC01g036220.2J	BolC03g056120.2J
662	BolC03g036720.2J	BolC08g025200.2J	BolC04g064550.2J	BolC06g046920.2J	BolC08g057790.2J	BolC07g032790.2J
663	BolC01g046450.2J	BolC03g046230.2J	BolC03g009190.2J	BolC04g024030.2J	BolC05g029150.2J	BolC09g010920.2J
664	BolC09g051310.2J	BolC07g049110.2J	BolC04g065620.2J	BolC06g032880.2J	BolC09g060780.2J	BolC01g004460.2J
665	BolC05g054440.2J	BolC08g044970.2J	BolC08g002450.2J	BolC02g010500.2J	BolC04g039090.2J	BolC09g059560.2J
666	BolC03g033840.2J	BolC01g023130.2J	BolC03g019070.2J	BolC02g039920.2J	BolC07g053850.2J	BolC06g042960.2J
667	BolC02g038740.2J	BolC03g080820.2J	BolC06g002900.2J	BolC02g054270.2J	BolC07g053640.2J	BolC04g049090.2J
668	BolC06g001410.2J	BolC01g055690.2J	BolC09g051310.2J	BolC02g036400.2J	BolC01g053800.2J	BolC09g005950.2J
669	BolC07g057990.2J	BolC01g001630.2J	BolC03g036720.2J	BolC09g060960.2J	BolC02g059820.2J	BolC03g028640.2J
670	BolC05g006830.2J	BolC08g060080.2J	BolC05g011590.2J	BolC01g049020.2J	BolC03g030530.2J	BolC09g046340.2J
671	BolC01g003280.2J	BolC04g038220.2J	BolC05g022020.2J	BolC01g002040.2J	BolC02g028910.2J	BolC01g015310.2J
672	BolC09g052650.2J	BolCnng004240.2J	BolC03g003870.2J	BolC03g049810.2J	BolC05g021170.2J	BolC06g025920.2J
673	BolC01g013480.2J	BolC09g037370.2J	BolC01g035970.2J	BolC09g048290.2J	BolC02g051970.2J	BolC08g012090.2J
674	BolC05g018690.2J	BolC03g016520.2J	BolC04g000710.2J	BolC09g025150.2J	BolC05g009220.2J	BolC05g062940.2J
675	BolC09g002480.2J	BolC03g006850.2J	BolC02g027680.2J	BolC03g051810.2J	BolC04g002040.2J	BolC03g073550.2J
676	BolC09g050970.2J	BolC02g016810.2J	BolC04g035160.2J	BolC06g000140.2J	BolC04g054230.2J	BolC04g040900.2J
677	BolC01g004610.2J	BolC05g007070.2J	BolC07g028680.2J	BolC03g069330.2J	BolC09g000740.2J	BolC03g067300.2J
678	BolC01g010090.2J	BolC04g066070.2J	BolC03g080540.2J	BolC03g015380.2J	BolC03g011670.2J	BolC02g007550.2J
679	BolC09g045690.2J	BolC04g048900.2J	BolC07g037080.2J	BolC03g085320.2J	BolC06g014120.2J	BolC01g020930.2J
680	BolC09g051110.2J	BolC04g009310.2J	BolC01g003980.2J	BolC09g017770.2J	BolC01g050840.2J	BolC04g054190.2J
681	BolC04g056880.2J	BolC01g052840.2J	BolC03g035760.2J	BolC02g012410.2J	BolCnng006410.2J	BolC05g048870.2J
682	BolC05g061930.2J	BolC01g004040.2J	BolC01g028050.2J	BolC03g023630.2J	BolC03g049010.2J	BolC01g040590.2J
683	BolC06g046400.2J	BolC08g033060.2J	BolC09g055370.2J	BolC01g029740.2J	BolC01g050980.2J	BolC03g042300.2J
684	BolC08g039970.2J	BolC09g016930.2J	BolC05g056670.2J	BolC05g016180.2J	BolC07g054500.2J	BolC03g039310.2J
685	BolC03g011290.2J	BolC02g058270.2J	BolC02g025410.2J	BolC05g000700.2J	BolC04g030530.2J	BolC09g064000.2J
686	BolC08g026980.2J	BolC03g006470.2J	BolC05g057220.2J	BolC03g018020.2J	BolC09g052520.2J	BolC04g067930.2J
687	BolC07g047990.2J	BolC08g049010.2J	BolC03g070390.2J	BolC09g055790.2J	BolC04g067750.2J	BolC03g026200.2J
688	BolC09g009030.2J	BolC03g038930.2J	BolC03g023670.2J	BolC09g024360.2J	BolC01g025080.2J	BolC03g016170.2J
689	BolC03g023000.2J	BolC07g007550.2J	BolC06g040850.2J	BolC01g001900.2J	BolC05g000700.2J	BolC02g013070.2J
690	BolC09g064340.2J	BolC04g067060.2J	BolC05g057700.2J	BolC02g055400.2J	BolC08g037330.2J	BolC09g063480.2J
691	BolC07g024640.2J	BolC03g001300.2J	BolC09g021260.2J	BolC05g051960.2J	BolC07g055240.2J	BolC05g050950.2J
692	BolC05g054940.2J	BolC03g071830.2J	BolC02g009830.2J	BolC02g002890.2J	BolC01g022500.2J	BolC03g007340.2J
693	BolC05g037770.2J	BolC01g036970.2J	BolC04g048000.2J	BolC09g057540.2J	BolC09g029630.2J	BolC04g045590.2J
694	BolC02g012090.2J	BolC01g023120.2J	BolC07g009620.2J	BolC08g051800.2J	BolC01g022690.2J	BolC07g035110.2J
695	BolC04g006920.2J	BolC05g009050.2J	BolC09g027500.2J	BolC05g022440.2J	BolC02g040250.2J	BolC07g058140.2J
696	BolC03g026110.2J	BolC05g063640.2J	BolC08g007820.2J	BolC07g036670.2J	BolC05g061230.2J	BolC06g019940.2J
697	BolC07g015020.2J	BolC03g077200.2J	BolC02g009920.2J	BolC03g028600.2J	BolC08g056950.2J	BolC06g044040.2J
698	BolC07g029330.2J	BolC04g039770.2J	BolC05g019690.2J	BolC04g041450.2J	BolC01g001540.2J	BolC03g007280.2J
699	BolC07g018350.2J	BolC02g012160.2J	BolC01g031570.2J	BolC08g008660.2J	BolC07g024640.2J	BolC07g027830.2J
700	BolC02g040080.2J	BolC03g021550.2J	BolC09g001550.2J	BolC03g050850.2J	BolC08g025320.2J	BolC06g027570.2J
701	BolC02g058090.2J	BolC05g060660.2J	BolC03g047130.2J	BolC05g012370.2J	BolC09g026400.2J	BolC03g027640.2J
702	BolC04g000010.2J	BolC07g026860.2J	BolC04g031550.2J	BolC03g029090.2J	BolC08g059470.2J	BolC02g030630.2J
703	BolC03g073480.2J	BolC08g025640.2J	BolC09g001500.2J	BolC02g000260.2J	BolC03g043120.2J	BolC04g021430.2J
704	BolC03g067020.2J	BolC06g032810.2J	BolC05g015860.2J	BolC04g047220.2J	BolC04g036450.2J	BolC06g028500.2J
705	BolC09g054140.2J	BolC05g048880.2J	BolC03g045560.2J	BolC06g025990.2J	BolC03g078710.2J	BolC09g068110.2J
706	BolC05g057150.2J	BolC05g061350.2J	BolC02g019760.2J	BolC07g003250.2J	BolC03g078700.2J	BolC08g041110.2J
707	BolC01g052650.2J	BolC05g048930.2J	BolC07g022290.2J	BolC04g044890.2J	BolC05g045410.2J	BolC09g047470.2J
708	BolC06g026610.2J	BolC09g062780.2J	BolC03g023770.2J	BolC08g043480.2J	BolC09g069260.2J	BolC03g015430.2J
709	BolC01g024080.2J	BolC07g052390.2J	BolC05g019840.2J	BolC03g006330.2J	BolC09g018880.2J	BolC08g053450.2J
710	BolC04g046450.2J	BolC09g011690.2J	BolC01g018850.2J	BolC08g047670.2J	BolC04g056880.2J	BolC08g031130.2J
711	BolC04g046380.2J	BolC01g053340.2J	BolC03g076840.2J	BolC01g024550.2J	BolC07g018480.2J	BolC04g046550.2J
712	BolC06g012560.2J	BolC04g044360.2J	BolC05g051100.2J	BolC07g044720.2J	BolC09g014680.2J	BolC03g066710.2J
713	BolC03g023790.2J	BolC03g077310.2J	BolC07g024500.2J	BolC02g036310.2J	BolC05g015710.2J	BolC05g007900.2J
714	BolC04g041070.2J	BolC08g002330.2J	BolC07g040460.2J	BolC06g024760.2J	BolC03g001120.2J	BolC09g001550.2J
715	BolC02g022170.2J	BolC09g011700.2J	BolC02g034350.2J	BolC06g013430.2J	BolC04g054180.2J	BolC03g031840.2J
716	BolC05g056110.2J	BolC07g006160.2J	BolC09g050310.2J	BolC02g057390.2J	BolC04g058240.2J	BolC04g044360.2J
717	BolC05g027100.2J	BolC08g008800.2J	BolC08g047420.2J	BolC07g030900.2J	BolC08g032040.2J	BolC04g022190.2J
718	BolC09g011880.2J	BolC09g014220.2J	BolC09g015810.2J	BolC02g035170.2J	BolC03g007540.2J	BolC09g001500.2J
719	BolC03g019390.2J	BolC02g061690.2J	BolC08g011720.2J	BolC07g011290.2J	BolC09g013780.2J	BolC06g048410.2J
720	BolC06g028280.2J	BolC05g015860.2J	BolC07g060320.2J	BolC06g038110.2J	BolC01g044910.2J	BolC09g053710.2J
721	BolC01g054350.2J	BolC05g012850.2J	BolC03g044980.2J	BolC04g053130.2J	BolC02g061370.2J	BolC09g004630.2J
722	BolC09g024070.2J	BolC06g014570.2J	BolC09g003310.2J	BolC01g041270.2J	BolC04g036250.2J	BolC07g040320.2J
723	BolC01g000540.2J	BolC03g069720.2J	BolC03g086220.2J	BolC04g040400.2J	BolC09g058920.2J	BolC02g006630.2J
724	BolC06g029690.2J	BolC06g047070.2J	BolC01g018070.2J	BolC09g028360.2J	BolC06g005340.2J	BolC04g008970.2J
725	BolC03g015560.2J	BolC09g004630.2J	BolC04g013640.2J	BolC05g016080.2J	BolC03g019670.2J	BolC03g046240.2J
726	BolC05g028710.2J	BolC07g044170.2J	BolC08g048850.2J	BolC02g019620.2J	BolC05g007940.2J	BolC04g057100.2J
727	BolC04g033660.2J	BolC01g037600.2J	BolC09g000720.2J	BolC04g031790.2J	BolC02g020420.2J	BolC07g023780.2J
728	BolC05g018610.2J	BolC05g048870.2J	BolC09g068160.2J	BolC05g020880.2J	BolC08g059000.2J	BolC04g005360.2J
729	BolC03g054250.2J	BolC07g041560.2J	BolC08g052330.2J	BolC03g048820.2J	BolC06g049930.2J	BolC04g055340.2J
730	BolC03g014110.2J	BolC02g011910.2J	BolC04g005200.2J	BolC01g049530.2J	BolC06g004550.2J	BolC01g024470.2J
731	BolC03g012790.2J	BolC06g022370.2J	BolC06g047110.2J	BolC02g039490.2J	BolC06g008580.2J	BolC08g007100.2J
732	BolC01g041270.2J	BolC05g036240.2J	BolC08g036800.2J	BolC08g016170.2J	BolC03g023860.2J	BolC07g057840.2J
733	BolC05g020040.2J	BolC03g048760.2J	BolC03g045050.2J	BolC07g037340.2J	BolC02g014730.2J	BolC07g051550.2J
734	BolC08g042580.2J	BolC09g008940.2J	BolC04g000010.2J	BolC08g037330.2J	BolC04g061730.2J	BolC04g040430.2J
735	BolC04g064050.2J	BolC06g019770.2J	BolC04g015790.2J	BolC07g050230.2J	BolC03g030090.2J	BolC06g004870.2J
736	BolC09g062460.2J	BolC06g042040.2J	BolC08g019410.2J	BolC06g032790.2J	BolC04g046670.2J	BolC04g010830.2J
737	BolC02g027930.2J	BolC03g017640.2J	BolC07g053350.2J	BolC04g058030.2J	BolC02g057390.2J	BolC08g055700.2J
738	BolC04g037110.2J	BolC03g000450.2J	BolC06g047950.2J	BolC08g040120.2J	BolC09g017420.2J	BolCnng000980.2J
739	BolC09g023910.2J	BolC07g030980.2J	BolC03g032200.2J	BolC03g050550.2J	BolC01g027420.2J	BolC09g055720.2J
740	BolC09g008690.2J	BolC06g045160.2J	BolC06g048440.2J	BolC05g054840.2J	BolC05g008190.2J	BolC04g032310.2J
741	BolC07g038660.2J	BolC07g045320.2J	BolC09g008810.2J	BolC06g015910.2J	BolC08g048720.2J	BolC08g032440.2J
742	BolC01g052710.2J	BolC07g060100.2J	BolC02g031790.2J	BolC01g016050.2J	BolC09g014170.2J	BolC08g035550.2J
743	BolC02g047670.2J	BolC05g063060.2J	BolC03g042070.2J	BolC05g004570.2J	BolC04g026910.2J	BolC01g001510.2J
744	BolC03g060930.2J	BolC04g002830.2J	BolC07g013630.2J	BolC08g060620.2J	BolC06g042560.2J	BolC06g046170.2J
745	BolC03g054100.2J	BolC03g031580.2J	BolC04g009990.2J	BolC01g001110.2J	BolC03g059990.2J	BolC02g015310.2J
746	BolC03g042550.2J	BolC05g050700.2J	BolC09g012740.2J	BolC08g050200.2J	BolC06g016190.2J	BolC04g067640.2J
747	BolC02g059830.2J	BolC09g023340.2J	BolC03g047760.2J	BolC03g026000.2J	BolC06g025240.2J	BolC04g008520.2J
748	BolC01g040930.2J	BolC01g018350.2J	BolC04g013650.2J	BolC07g051010.2J	BolC01g039580.2J	BolC07g052220.2J
749	BolC03g073850.2J	BolC08g058820.2J	BolC09g035750.2J	BolC06g009030.2J	BolC06g040310.2J	BolC06g030560.2J
750	BolC04g019370.2J	BolC07g016430.2J	BolC04g065900.2J	BolC04g068120.2J	BolC09g001000.2J	BolC03g038890.2J
751	BolC03g005710.2J	BolC09g036220.2J	BolC08g007100.2J	BolC01g003030.2J	BolC07g045590.2J	BolC03g016630.2J
752	BolC05g033120.2J	BolC04g061030.2J	BolC06g046170.2J	BolC08g037320.2J	BolC07g057010.2J	BolC01g006900.2J
753	BolC04g040370.2J	BolC03g066810.2J	BolC02g043780.2J	BolC08g038060.2J	BolC02g016670.2J	BolC09g026380.2J
754	BolC01g046320.2J	BolC04g004390.2J	BolC04g058650.2J	BolC08g017660.2J	BolC02g034470.2J	BolC06g002380.2J
755	BolC01g050840.2J	BolC07g041870.2J	BolC01g040940.2J	BolC02g044340.2J	BolC09g016870.2J	BolC04g034150.2J
756	BolC09g047510.2J	BolC03g050260.2J	BolC08g045800.2J	BolC09g065030.2J	BolC02g027480.2J	BolC03g006470.2J
757	BolC07g008330.2J	BolC03g020190.2J	BolC05g017430.2J	BolC07g058190.2J	BolC02g056920.2J	BolC08g059520.2J
758	BolC05g062900.2J	BolC06g020670.2J	BolC02g060230.2J	BolC06g034750.2J	BolC07g012010.2J	BolC05g024020.2J
759	BolC02g044820.2J	BolC05g055940.2J	BolC06g005150.2J	BolC07g051430.2J	BolC08g038700.2J	BolC01g000940.2J
760	BolC05g024470.2J	BolC03g066770.2J	BolC06g000930.2J	BolC04g052860.2J	BolC07g037040.2J	BolC05g050520.2J
761	BolC09g052200.2J	BolC08g012450.2J	BolC05g040500.2J	BolC02g061760.2J	BolC08g056320.2J	BolC06g045060.2J
762	BolC03g021910.2J	BolC01g025360.2J	BolC03g050250.2J	BolC01g041650.2J	BolC01g020700.2J	BolC06g017700.2J
763	BolC04g048410.2J	BolC04g063400.2J	BolC07g053630.2J	BolC05g020210.2J	BolC03g065870.2J	BolC07g020700.2J
764	BolC06g032240.2J	BolC08g044030.2J	BolC05g008730.2J	BolC02g014720.2J	BolC05g063800.2J	BolC09g047880.2J
765	BolC05g003080.2J	BolC09g012980.2J	BolC02g021720.2J	BolC01g057520.2J	BolC05g018610.2J	BolCnng004240.2J
766	BolC03g057850.2J	BolC01g011600.2J	BolC09g050420.2J	BolC09g021320.2J	BolC02g025920.2J	BolC05g062190.2J
767	BolC05g063040.2J	BolC01g021210.2J	BolC07g010700.2J	BolC03g080090.2J	BolC03g074420.2J	BolC08g056500.2J
768	BolC01g041320.2J	BolC03g035590.2J	BolC03g079080.2J	BolC06g048970.2J	BolC07g040610.2J	BolC05g040250.2J
769	BolC03g029680.2J	BolC07g039130.2J	BolC04g015810.2J	BolC09g001510.2J	BolC07g019190.2J	BolC05g061090.2J
770	BolC07g041050.2J	BolC03g056210.2J	BolC08g046040.2J	BolC03g066840.2J	BolC07g047470.2J	BolC07g010610.2J
771	BolC05g062680.2J	BolC07g058440.2J	BolC09g059140.2J	BolC07g047880.2J	BolC01g045900.2J	BolC03g051650.2J
772	BolC04g045060.2J	BolC07g059760.2J	BolC04g046450.2J	BolC04g036250.2J	BolC01g046640.2J	BolC04g066720.2J
773	BolC05g062240.2J	BolC06g022520.2J	BolC04g046380.2J	BolC05g019250.2J	BolC06g039050.2J	BolC07g043080.2J
774	BolC05g052490.2J	BolC04g055320.2J	BolC05g051540.2J	BolC09g001560.2J	BolC02g014240.2J	BolC07g013690.2J
775	BolC01g052510.2J	BolC09g063430.2J	BolC05g040390.2J	BolC08g001100.2J	BolC02g034950.2J	BolC08g019160.2J
776	BolC08g043510.2J	BolC01g022290.2J	BolC03g015560.2J	BolC02g026130.2J	BolC06g028620.2J	BolC07g030440.2J
777	BolC03g048740.2J	BolC01g015840.2J	BolC08g053370.2J	BolC07g051980.2J	BolC01g024080.2J	BolC05g045770.2J
778	BolC04g020230.2J	BolC09g019000.2J	BolC03g005820.2J	BolC05g054940.2J	BolC04g065640.2J	BolC04g045490.2J
779	BolC09g019890.2J	BolC04g040900.2J	BolC09g052510.2J	BolC09g021310.2J	BolC09g061060.2J	BolC03g017540.2J
780	BolC03g009050.2J	BolC06g021690.2J	BolC03g072700.2J	BolC05g006850.2J	BolC07g031890.2J	BolC05g063620.2J
781	BolC02g039740.2J	BolC09g057540.2J	BolC04g040300.2J	BolC04g039760.2J	BolC05g055840.2J	BolC04g050310.2J
782	BolC04g014620.2J	BolC08g003360.2J	BolC08g026070.2J	BolC07g031020.2J	BolC06g029400.2J	BolC09g066480.2J
783	BolC08g047140.2J	BolC02g023040.2J	BolC09g039630.2J	BolC06g045770.2J	BolC01g000790.2J	BolC07g019690.2J
784	BolC01g014320.2J	BolC09g005620.2J	BolC08g031930.2J	BolC03g044920.2J	BolC02g016090.2J	BolC08g054740.2J
785	BolC04g019080.2J	BolC01g023960.2J	BolC08g044020.2J	BolC09g027620.2J	BolC03g001180.2J	BolC05g043380.2J
786	BolC03g074630.2J	BolC01g015210.2J	BolC05g000600.2J	BolC03g066850.2J	BolC02g034510.2J	BolC03g017220.2J
787	BolC09g060870.2J	BolC05g048240.2J	BolC08g022400.2J	BolC04g018340.2J	BolC02g007180.2J	BolC01g002020.2J
788	BolC09g067930.2J	BolC09g024180.2J	BolC02g053590.2J	BolC07g039600.2J	BolC01g022710.2J	BolC06g038960.2J
789	BolC06g033650.2J	BolC08g039270.2J	BolC01g049750.2J	BolC09g045720.2J	BolC01g019850.2J	BolC04g009990.2J
790	BolC04g054060.2J	BolC06g008230.2J	BolC05g063020.2J	BolC03g076240.2J	BolC06g044020.2J	BolC03g067130.2J
791	BolC08g027770.2J	BolC03g054970.2J	BolC09g000800.2J	BolC09g026420.2J	BolC02g024470.2J	BolC08g035860.2J
792	BolC07g009870.2J	BolC04g048950.2J	BolC03g058410.2J	BolC02g023140.2J	BolC03g043990.2J	BolC05g044040.2J
793	BolC09g062040.2J	BolC03g056110.2J	BolC09g016610.2J	BolC07g045310.2J	BolC02g003140.2J	BolC03g042070.2J
794	BolC04g051360.2J	BolC02g028650.2J	BolC04g047950.2J	BolC03g051340.2J	BolC09g002810.2J	BolC03g081970.2J
795	BolC08g024730.2J	BolC03g034090.2J	BolC09g056910.2J	BolC02g009990.2J	BolC07g051980.2J	BolC09g012980.2J
796	BolC03g070200.2J	BolC09g066480.2J	BolC03g015370.2J	BolC01g029390.2J	BolC08g016130.2J	BolC09g007690.2J
797	BolC08g018740.2J	BolC03g078100.2J	BolC08g056630.2J	BolC06g049030.2J	BolC07g031020.2J	BolC09g066390.2J
798	BolC08g009080.2J	BolC06g039100.2J	BolC07g003650.2J	BolC01g041320.2J	BolC07g014080.2J	BolC03g075190.2J
799	BolC05g050050.2J	BolC02g060460.2J	BolC04g059360.2J	BolC02g039540.2J	BolC02g032450.2J	BolC05g053900.2J
800	BolC08g054870.2J	BolC01g002920.2J	BolC08g046900.2J	BolC05g000500.2J	BolC07g011140.2J	BolC08g000210.2J
801	BolC03g032910.2J	BolC09g008580.2J	BolC03g079120.2J	BolC05g019230.2J	BolC02g058400.2J	BolC03g034890.2J
802	BolC01g042900.2J	BolC09g046600.2J	BolC04g064600.2J	BolC08g027760.2J	BolC03g042190.2J	BolC03g051850.2J
803	BolC08g019070.2J	BolC05g023680.2J	BolC05g006400.2J	BolC09g003350.2J	BolC04g007240.2J	BolC04g055410.2J
804	BolC02g022920.2J	BolC03g022190.2J	BolC08g017460.2J	BolC08g026620.2J	BolC04g008990.2J	BolC06g043110.2J
805	BolC08g030480.2J	BolC03g071610.2J	BolC01g047000.2J	BolC06g022990.2J	BolC07g042800.2J	BolC04g013860.2J
806	BolC03g078680.2J	BolC09g066390.2J	BolC09g064870.2J	BolC07g036640.2J	BolC04g017410.2J	BolC03g003860.2J
807	BolC09g064790.2J	BolC02g024130.2J	BolC09g018360.2J	BolC08g056870.2J	BolC08g037320.2J	BolC01g044210.2J
808	BolC05g015890.2J	BolC08g013250.2J	BolC02g007880.2J	BolC08g052560.2J	BolC02g005500.2J	BolC08g022230.2J
809	BolC06g047270.2J	BolC07g036490.2J	BolC03g071840.2J	BolC07g044350.2J	BolC05g031070.2J	BolC01g036380.2J
810	BolC07g016520.2J	BolC05g024840.2J	BolC01g041400.2J	BolC08g020600.2J	BolC02g003750.2J	BolC09g055360.2J
811	BolC06g047300.2J	BolC04g057260.2J	BolC01g050200.2J	BolC04g017080.2J	BolC05g011760.2J	BolC04g065390.2J
812	BolC08g028000.2J	BolC05g007370.2J	BolC02g019740.2J	BolC08g032990.2J	BolC09g047800.2J	BolC04g066600.2J
813	BolC03g078750.2J	BolCnng006760.2J	BolC08g015190.2J	BolC08g045770.2J	BolC05g038110.2J	BolC09g030750.2J
814	BolC03g023770.2J	BolC03g059390.2J	BolC02g052620.2J	BolC04g031830.2J	BolC09g056810.2J	BolC04g043030.2J
815	BolC01g017630.2J	BolC09g051770.2J	BolC02g016970.2J	BolC07g055180.2J	BolC09g062360.2J	BolC02g063540.2J
816	BolC02g005290.2J	BolC07g043250.2J	BolC04g068240.2J	BolC03g019090.2J	BolC06g048080.2J	BolCnng002220.2J
817	BolC09g009690.2J	BolC02g059560.2J	BolC04g067640.2J	BolC03g016140.2J	BolC08g026470.2J	BolC06g003640.2J
818	BolC03g078720.2J	BolC03g001620.2J	BolC04g054790.2J	BolC07g037150.2J	BolC01g012770.2J	BolC03g055630.2J
819	BolC07g035190.2J	BolC06g048430.2J	BolC05g010140.2J	BolC07g052570.2J	BolC02g022150.2J	BolC03g047310.2J
820	BolC07g051950.2J	BolC03g004500.2J	BolC05g056350.2J	BolC07g019710.2J	BolC09g067940.2J	BolC03g004500.2J
821	BolC01g054830.2J	BolC05g051550.2J	BolC04g017810.2J	BolC01g045000.2J	BolC08g041440.2J	BolC06g046410.2J
822	BolC03g066850.2J	BolC09g009280.2J	BolC09g058830.2J	BolC08g010700.2J	BolC09g018710.2J	BolC09g049700.2J
823	BolC02g001600.2J	BolC08g005990.2J	BolC07g029140.2J	BolC03g006580.2J	BolC03g024980.2J	BolC02g043640.2J
824	BolC07g037670.2J	BolC03g073570.2J	BolC07g056190.2J	BolC09g057110.2J	BolC06g032790.2J	BolC08g023110.2J
825	BolCnng005260.2J	BolC01g009470.2J	BolC04g006110.2J	BolC08g055070.2J	BolC09g025150.2J	BolC03g010530.2J
826	BolC06g019440.2J	BolC08g040100.2J	BolC08g026250.2J	BolC05g004130.2J	BolC01g002040.2J	BolC03g036930.2J
827	BolC02g015140.2J	BolC01g003950.2J	BolC08g041100.2J	BolC08g052730.2J	BolC03g039970.2J	BolC01g042240.2J
828	BolC05g010810.2J	BolC03g010530.2J	BolC09g021560.2J	BolC06g031650.2J	BolC09g051820.2J	BolC03g085800.2J
829	BolC02g028910.2J	BolC05g039450.2J	BolC09g011690.2J	BolC04g055070.2J	BolC01g016540.2J	BolC09g000990.2J
830	BolC02g003370.2J	BolC06g004170.2J	BolC04g050900.2J	BolC07g058630.2J	BolC01g016580.2J	BolC09g062880.2J
831	BolC04g053010.2J	BolC09g000610.2J	BolC09g011700.2J	BolCnng003180.2J	BolC06g045580.2J	BolC04g037670.2J
832	BolC08g041690.2J	BolC04g007140.2J	BolC03g076960.2J	BolC06g018600.2J	BolC08g032190.2J	BolC04g003700.2J
833	BolC01g045900.2J	BolC04g041840.2J	BolC06g048410.2J	BolC07g037200.2J	BolC03g011290.2J	BolC06g035550.2J
834	BolC03g001060.2J	BolC08g028820.2J	BolC09g010880.2J	BolC06g033070.2J	BolC06g048070.2J	BolC02g061110.2J
835	BolC03g038620.2J	BolC08g053250.2J	BolC05g014470.2J	BolC06g000360.2J	BolC04g002430.2J	BolC04g010820.2J
836	BolC07g023430.2J	BolC06g022580.2J	BolC03g013950.2J	BolC06g049250.2J	BolC02g029340.2J	BolC04g053700.2J
837	BolC07g033480.2J	BolCnng000980.2J	BolC09g034060.2J	BolC07g004440.2J	BolC09g063670.2J	BolC03g014710.2J
838	BolC08g013460.2J	BolC07g044620.2J	BolC04g022090.2J	BolC02g048570.2J	BolC07g013200.2J	BolC07g030350.2J
839	BolC05g030450.2J	BolC04g065390.2J	BolC09g028970.2J	BolC06g040760.2J	BolC02g023140.2J	BolC03g028710.2J
840	BolC07g033720.2J	BolC08g036100.2J	BolC01g030120.2J	BolC07g029100.2J	BolC02g045540.2J	BolC01g000640.2J
841	BolC04g063930.2J	BolC06g039070.2J	BolC05g049280.2J	BolC06g032650.2J	BolC05g043590.2J	BolC03g026740.2J
842	BolC06g045190.2J	BolC01g023390.2J	BolC02g043900.2J	BolC06g015660.2J	BolC08g024820.2J	BolC06g001920.2J
843	BolC04g009140.2J	BolC01g003920.2J	BolC07g035560.2J	BolC05g004080.2J	BolC03g083020.2J	BolC04g030770.2J
844	BolC05g051660.2J	BolC08g039850.2J	BolC09g023050.2J	BolC05g017050.2J	BolC01g012360.2J	BolC01g057640.2J
845	BolC05g008020.2J	BolC07g058060.2J	BolC09g047990.2J	BolC03g048020.2J	BolC06g044430.2J	BolC03g010660.2J
846	BolC03g045840.2J	BolC06g014590.2J	BolC04g045170.2J	BolC01g054460.2J	BolC01g033080.2J	BolC03g012990.2J
847	BolC03g070760.2J	BolC09g025360.2J	BolC03g025040.2J	BolC07g024810.2J	BolC04g053650.2J	BolC03g068080.2J
848	BolC07g014540.2J	BolC02g062090.2J	BolC07g056020.2J	BolC04g001190.2J	BolC03g015730.2J	BolC05g001410.2J
849	BolC09g041650.2J	BolC04g033690.2J	BolC08g049270.2J	BolC02g001000.2J	BolC09g058660.2J	BolC09g063100.2J
850	BolC03g079300.2J	BolC08g033120.2J	BolC09g039400.2J	BolC03g016150.2J	BolC07g051250.2J	BolC05g030770.2J
851	BolC05g050220.2J	BolC07g027030.2J	BolC01g010440.2J	BolC05g061230.2J	BolC01g051310.2J	BolC07g040930.2J
852	BolC03g052590.2J	BolC02g014220.2J	BolC02g000320.2J	BolC01g030330.2J	BolC03g043900.2J	BolC05g050670.2J
853	BolC03g001660.2J	BolC08g002220.2J	BolC08g030530.2J	BolC04g008190.2J	BolC07g027490.2J	BolC06g021400.2J
854	BolC01g038750.2J	BolC06g002380.2J	BolC02g024370.2J	BolC08g029770.2J	BolC03g033720.2J	BolC08g018470.2J
855	BolC02g055530.2J	BolC03g028860.2J	BolC08g026840.2J	BolC03g055160.2J	BolC08g044290.2J	BolC09g002820.2J
856	BolC09g003510.2J	BolC07g047250.2J	BolC06g017310.2J	BolC07g037660.2J	BolC03g074680.2J	BolC03g007500.2J
857	BolC06g048810.2J	BolC03g086090.2J	BolC07g036000.2J	BolC03g085520.2J	BolC04g053260.2J	BolC02g052580.2J
858	BolC05g051540.2J	BolC03g026200.2J	BolC07g049200.2J	BolC06g032860.2J	BolC08g024100.2J	BolC02g048500.2J
859	BolC03g055880.2J	BolC08g014290.2J	BolC03g034740.2J	BolC03g014820.2J	BolC03g043980.2J	BolC03g013420.2J
860	BolC07g035830.2J	BolC03g071570.2J	BolC04g003700.2J	BolC06g019930.2J	BolC06g040010.2J	BolC04g000420.2J
861	BolC07g003990.2J	BolC01g057520.2J	BolC06g017090.2J	BolC03g041180.2J	BolC08g039480.2J	BolC09g063530.2J
862	BolC05g050390.2J	BolC04g057270.2J	BolC05g057180.2J	BolCnng005350.2J	BolC01g046090.2J	BolC01g006510.2J
863	BolC08g059000.2J	BolC03g043830.2J	BolC08g058620.2J	BolC02g055060.2J	BolC01g008030.2J	BolC05g056470.2J
864	BolC04g020370.2J	BolC06g024550.2J	BolC05g020050.2J	BolC09g066540.2J	BolC05g057300.2J	BolC04g054400.2J
865	BolC05g009220.2J	BolC02g017790.2J	BolC07g053790.2J	BolC01g005560.2J	BolC03g033550.2J	BolC05g063060.2J
866	BolC07g007930.2J	BolC07g058230.2J	BolC08g039370.2J	BolC09g003890.2J	BolC04g007910.2J	BolC04g060310.2J
867	BolC08g015190.2J	BolC06g025830.2J	BolC05g013690.2J	BolC03g023370.2J	BolC08g041280.2J	BolC03g045060.2J
868	BolC02g061950.2J	BolC07g028020.2J	BolC02g030630.2J	BolC01g007950.2J	BolC07g023040.2J	BolC01g056270.2J
869	BolC07g013610.2J	BolC02g008430.2J	BolC03g030110.2J	BolC03g065400.2J	BolC05g040380.2J	BolC05g002870.2J
870	BolC01g028700.2J	BolC05g007810.2J	BolC03g036550.2J	BolC04g054230.2J	BolC08g047140.2J	BolC06g011660.2J
871	BolC09g002750.2J	BolC05g015540.2J	BolC03g019330.2J	BolC08g043720.2J	BolC06g020650.2J	BolC07g054680.2J
872	BolC02g001420.2J	BolC03g028800.2J	BolC05g026340.2J	BolC03g059670.2J	BolC04g061530.2J	BolC09g062230.2J
873	BolC01g046090.2J	BolC01g024020.2J	BolC03g008480.2J	BolC03g017200.2J	BolC07g024060.2J	BolC05g037130.2J
874	BolC02g014460.2J	BolC02g027830.2J	BolC09g051190.2J	BolC05g003570.2J	BolC04g054860.2J	BolC06g002480.2J
875	BolC05g045620.2J	BolC08g046380.2J	BolC08g032760.2J	BolC03g031530.2J	BolC03g000130.2J	BolC04g037660.2J
876	BolC08g058620.2J	BolC02g054520.2J	BolC03g085800.2J	BolC09g015580.2J	BolC03g028550.2J	BolC07g054060.2J
877	BolC01g031570.2J	BolC07g050650.2J	BolC06g012490.2J	BolC01g054650.2J	BolC04g055850.2J	BolC03g078250.2J
878	BolC03g056320.2J	BolC05g006350.2J	BolC08g049570.2J	BolC08g022150.2J	BolC03g083240.2J	BolC09g066170.2J
879	BolC03g044650.2J	BolC08g057730.2J	BolC01g020930.2J	BolC08g043450.2J	BolC07g025070.2J	BolC08g049570.2J
880	BolC03g046090.2J	BolC07g051640.2J	BolC06g042010.2J	BolC09g063220.2J	BolC04g008190.2J	BolC09g063750.2J
881	BolC05g011570.2J	BolC05g000830.2J	BolC02g029820.2J	BolC03g086460.2J	BolC07g014940.2J	BolC02g010000.2J
882	BolC05g038470.2J	BolC03g029010.2J	BolC03g024820.2J	BolC07g019620.2J	BolC09g057050.2J	BolC08g001130.2J
883	BolC03g027330.2J	BolC08g023730.2J	BolC06g003640.2J	BolC07g053550.2J	BolC01g033870.2J	BolC04g033260.2J
884	BolC06g015810.2J	BolC05g004810.2J	BolC07g054060.2J	BolC02g060370.2J	BolC05g019200.2J	BolC03g008310.2J
885	BolC03g074210.2J	BolC08g053890.2J	BolC09g026170.2J	BolC01g016770.2J	BolC06g047360.2J	BolC06g027400.2J
886	BolC07g024060.2J	BolC09g064190.2J	BolC01g031650.2J	BolC05g011550.2J	BolC07g043230.2J	BolC09g045830.2J
887	BolC08g024040.2J	BolC05g012360.2J	BolC02g058320.2J	BolC02g020420.2J	BolC03g014610.2J	BolC08g023150.2J
888	BolC07g037640.2J	BolC07g031760.2J	BolC03g067450.2J	BolC05g009340.2J	BolC07g036640.2J	BolC03g028720.2J
889	BolC06g041660.2J	BolC05g002440.2J	BolC06g039220.2J	BolC01g022860.2J	BolC05g015530.2J	BolC07g026330.2J
890	BolC05g003700.2J	BolC03g075850.2J	BolC08g035550.2J	BolC07g040540.2J	BolC09g066530.2J	BolC03g036430.2J
891	BolC07g037090.2J	BolC03g016490.2J	BolC04g022820.2J	BolC09g062790.2J	BolC04g056030.2J	BolC04g060030.2J
892	BolC08g048040.2J	BolC09g021700.2J	BolC05g002010.2J	BolC02g023950.2J	BolC03g040520.2J	BolC02g055390.2J
893	BolC09g042920.2J	BolC09g005420.2J	BolC02g019880.2J	BolC02g045230.2J	BolC07g050450.2J	BolC03g050080.2J
894	BolC01g043030.2J	BolC02g060900.2J	BolC01g019340.2J	BolC08g014680.2J	BolC02g062790.2J	BolC03g036820.2J
895	BolC02g014010.2J	BolC06g050460.2J	BolC01g010200.2J	BolC01g011700.2J	BolC08g014680.2J	BolC08g041100.2J
896	BolC01g023220.2J	BolC03g068020.2J	BolC03g044440.2J	BolC07g053560.2J	BolC06g045270.2J	BolC08g008800.2J
897	BolC04g013490.2J	BolC03g006430.2J	BolC04g047990.2J	BolC07g060670.2J	BolC06g017990.2J	BolC07g052500.2J
898	BolC04g046600.2J	BolC02g010680.2J	BolC02g023780.2J	BolC05g049680.2J	BolC04g065670.2J	BolC05g052050.2J
899	BolC03g020240.2J	BolC08g036270.2J	BolC02g061780.2J	BolC07g007450.2J	BolC01g047650.2J	BolC04g010450.2J
900	BolC08g017710.2J	BolC02g059610.2J	BolC05g015960.2J	BolC02g046050.2J	BolC02g003260.2J	BolC05g018030.2J
901	BolC08g040960.2J	BolC02g007530.2J	BolC09g035440.2J	BolC02g051180.2J	BolC09g000760.2J	BolC04g047770.2J
902	BolC07g050220.2J	BolC03g082860.2J	BolC03g084270.2J	BolC04g068370.2J	BolC08g053300.2J	BolC04g035080.2J
903	BolC02g029040.2J	BolC03g054170.2J	BolC02g010260.2J	BolC06g030340.2J	BolC07g016030.2J	BolC05g001040.2J
904	BolC05g052240.2J	BolC07g045310.2J	BolC07g042790.2J	BolC04g006850.2J	BolC09g031130.2J	BolC04g057320.2J
905	BolC09g024310.2J	BolC01g044210.2J	BolC09g040390.2J	BolC07g046110.2J	BolC06g033190.2J	BolC07g041680.2J
906	BolC04g039390.2J	BolC09g050390.2J	BolC01g012860.2J	BolC04g048270.2J	BolC04g011180.2J	BolC06g041910.2J
907	BolC06g027110.2J	BolC07g048540.2J	BolC03g015230.2J	BolC09g002650.2J	BolC07g028860.2J	BolC04g040700.2J
908	BolC08g020550.2J	BolC05g040850.2J	BolC06g051060.2J	BolC05g050500.2J	BolC04g002200.2J	BolC07g042790.2J
909	BolC07g039480.2J	BolC05g037130.2J	BolC01g010140.2J	BolC03g073900.2J	BolC01g052710.2J	BolC08g037050.2J
910	BolC04g002930.2J	BolC07g048330.2J	BolC06g004200.2J	BolC03g069670.2J	BolC03g014330.2J	BolC03g076850.2J
911	BolC03g014140.2J	BolC03g007760.2J	BolC05g037540.2J	BolC05g036270.2J	BolC01g036110.2J	BolC08g025680.2J
912	BolC03g069880.2J	BolC08g040210.2J	BolC08g038840.2J	BolC01g005620.2J	BolC03g003030.2J	BolC06g026010.2J
913	BolC01g046430.2J	BolC09g009020.2J	BolC05g056840.2J	BolC08g037100.2J	BolC06g019720.2J	BolC08g049280.2J
914	BolC01g044890.2J	BolC08g050490.2J	BolC09g059560.2J	BolC03g040310.2J	BolC07g034180.2J	BolC09g056610.2J
915	BolC06g008260.2J	BolC05g001370.2J	BolC03g049870.2J	BolCnng004700.2J	BolC07g041400.2J	BolC08g038100.2J
916	BolC06g035040.2J	BolC01g056500.2J	BolC05g013980.2J	BolC09g040840.2J	BolC04g041450.2J	BolC08g054930.2J
917	BolC02g058490.2J	BolC04g032850.2J	BolC05g053590.2J	BolC05g001430.2J	BolC08g046680.2J	BolC03g057330.2J
918	BolC03g081120.2J	BolC01g015180.2J	BolC06g030250.2J	BolC01g012380.2J	BolC04g034820.2J	BolC08g046650.2J
919	BolC04g062560.2J	BolC01g014120.2J	BolC08g014980.2J	BolC09g067250.2J	BolC05g033120.2J	BolC09g013940.2J
920	BolC08g044290.2J	BolC05g010630.2J	BolC03g050470.2J	BolC03g070100.2J	BolC03g049350.2J	BolC06g013910.2J
921	BolC09g047780.2J	BolC06g017270.2J	BolC02g061950.2J	BolC08g008540.2J	BolC04g043260.2J	BolC07g034780.2J
922	BolC05g018270.2J	BolC01g037900.2J	BolC02g014320.2J	BolC03g059240.2J	BolC09g009370.2J	BolC04g057270.2J
923	BolC07g038400.2J	BolC02g040600.2J	BolC05g052170.2J	BolC01g023530.2J	BolC09g059850.2J	BolC07g003250.2J
924	BolC05g000400.2J	BolC03g083630.2J	BolC06g038870.2J	BolC09g064770.2J	BolC07g033590.2J	BolC08g023730.2J
925	BolC09g014910.2J	BolC05g052230.2J	BolC01g019290.2J	BolC03g083630.2J	BolC02g058900.2J	BolC07g030910.2J
926	BolC05g038650.2J	BolC07g017270.2J	BolC01g010190.2J	BolCnng006680.2J	BolC07g044310.2J	BolC06g020670.2J
927	BolC04g066240.2J	BolC03g085440.2J	BolC04g030880.2J	BolC05g022410.2J	BolC04g008500.2J	BolC06g044510.2J
928	BolC04g065640.2J	BolCnng006680.2J	BolC09g017360.2J	BolC08g058290.2J	BolC09g005610.2J	BolC03g086410.2J
929	BolC09g000840.2J	BolC07g024620.2J	BolC01g042230.2J	BolC06g022290.2J	BolC01g005260.2J	BolC02g004740.2J
930	BolC05g049830.2J	BolC04g033260.2J	BolC03g017470.2J	BolC06g025400.2J	BolC03g020010.2J	BolC08g033600.2J
931	BolC05g058170.2J	BolC03g036670.2J	BolC06g020450.2J	BolC04g014050.2J	BolC01g051280.2J	BolC07g022130.2J
932	BolC07g025070.2J	BolC01g053940.2J	BolC08g027980.2J	BolC03g051600.2J	BolC01g051360.2J	BolC04g004700.2J
933	BolC06g030960.2J	BolC05g003100.2J	BolC02g027780.2J	BolC04g063670.2J	BolC08g024220.2J	BolC05g034170.2J
934	BolC05g044910.2J	BolC03g014710.2J	BolC03g008340.2J	BolC08g053990.2J	BolC06g028280.2J	BolC09g060630.2J
935	BolC09g016870.2J	BolC03g036930.2J	BolC08g046950.2J	BolC09g010230.2J	BolC07g058570.2J	BolC05g002600.2J
936	BolC06g043530.2J	BolC08g055430.2J	BolC02g007940.2J	BolC07g045320.2J	BolC01g025540.2J	BolC05g027400.2J
937	BolC08g029800.2J	BolC09g040480.2J	BolC07g054270.2J	BolC03g046770.2J	BolC01g054350.2J	BolC01g020380.2J
938	BolC02g041300.2J	BolC08g040970.2J	BolC05g059300.2J	BolC03g065730.2J	BolC03g029770.2J	BolC04g061000.2J
939	BolC03g027300.2J	BolC05g021500.2J	BolC03g008130.2J	BolC08g029510.2J	BolC06g005960.2J	BolC07g051640.2J
940	BolC01g000060.2J	BolC09g044010.2J	BolC03g058330.2J	BolC08g060070.2J	BolC01g023530.2J	BolC02g045140.2J
941	BolC05g034050.2J	BolC09g030390.2J	BolC05g048430.2J	BolC03g023660.2J	BolC05g026550.2J	BolC01g014740.2J
942	BolC03g020270.2J	BolC03g006540.2J	BolC06g027420.2J	BolC08g034740.2J	BolC03g014110.2J	BolC01g027870.2J
943	BolC02g054770.2J	BolC08g032280.2J	BolC09g050270.2J	BolC02g025790.2J	BolC06g045820.2J	BolC05g009250.2J
944	BolC05g012070.2J	BolC07g028870.2J	BolC06g035550.2J	BolC02g061110.2J	BolC07g005030.2J	BolC08g058010.2J
945	BolC05g044410.2J	BolC07g044920.2J	BolC08g037160.2J	BolC05g001290.2J	BolC05g013650.2J	BolC01g004850.2J
946	BolC02g019760.2J	BolC02g004710.2J	BolC03g027640.2J	BolC02g029880.2J	BolC01g016790.2J	BolC06g042490.2J
947	BolC09g017420.2J	BolC04g044020.2J	BolC03g046530.2J	BolC04g054680.2J	BolC05g046210.2J	BolC03g051390.2J
948	BolC03g072890.2J	BolC01g032920.2J	BolC05g029450.2J	BolC01g036960.2J	BolC03g040100.2J	BolC03g047760.2J
949	BolC08g025990.2J	BolC05g040950.2J	BolC08g001750.2J	BolC08g053740.2J	BolC09g069160.2J	BolC09g003720.2J
950	BolC03g005840.2J	BolC03g001490.2J	BolC07g036210.2J	BolC01g003570.2J	BolC01g005070.2J	BolC04g067500.2J
951	BolC05g012730.2J	BolC04g053130.2J	BolC09g061910.2J	BolC08g059940.2J	BolC04g033350.2J	BolC07g009570.2J
952	BolC06g027420.2J	BolC08g049300.2J	BolC07g030070.2J	BolC05g055840.2J	BolC04g050340.2J	BolC03g014620.2J
953	BolC03g026320.2J	BolC05g050770.2J	BolC02g001600.2J	BolC04g002180.2J	BolC08g013830.2J	BolC06g014520.2J
954	BolC04g013650.2J	BolC09g026030.2J	BolC06g027400.2J	BolC05g043590.2J	BolC04g035010.2J	BolC09g063560.2J
955	BolC08g046000.2J	BolC01g006900.2J	BolC07g020180.2J	BolC08g047980.2J	BolC09g016450.2J	BolC05g052400.2J
956	BolC09g056880.2J	BolC09g057560.2J	BolC07g054970.2J	BolC08g054880.2J	BolC01g009110.2J	BolC09g009670.2J
957	BolC02g011280.2J	BolC03g064830.2J	BolC01g005060.2J	BolC03g022020.2J	BolC03g049810.2J	BolC09g042740.2J
958	BolC03g071210.2J	BolC09g065330.2J	BolC05g021030.2J	BolC08g036090.2J	BolC09g049870.2J	BolC05g024900.2J
959	BolC06g028850.2J	BolC09g063130.2J	BolC07g037900.2J	BolC04g017690.2J	BolC02g005280.2J	BolC05g053730.2J
960	BolC06g037060.2J	BolC09g027130.2J	BolC02g059830.2J	BolC03g032390.2J	BolC05g012070.2J	BolC07g051610.2J
961	BolC04g012360.2J	BolC08g014410.2J	BolC03g013060.2J	BolC01g040800.2J	BolC05g030020.2J	BolC07g010700.2J
962	BolC09g054230.2J	BolC06g025920.2J	BolC03g006860.2J	BolC09g046110.2J	BolC09g002750.2J	BolC08g049230.2J
963	BolC09g038820.2J	BolC03g027240.2J	BolC08g054820.2J	BolC06g044390.2J	BolC03g038620.2J	BolC09g027040.2J
964	BolC03g086460.2J	BolC03g086220.2J	BolC06g000290.2J	BolC01g005180.2J	BolC05g056110.2J	BolC05g006720.2J
965	BolC02g045680.2J	BolC04g037660.2J	BolC04g062910.2J	BolC08g055640.2J	BolC04g052520.2J	BolC07g041360.2J
966	BolC05g025690.2J	BolC09g069340.2J	BolC07g029950.2J	BolC05g012730.2J	BolC04g023940.2J	BolC07g008110.2J
967	BolC06g019130.2J	BolC04g002740.2J	BolC02g052580.2J	BolC04g001990.2J	BolC08g052730.2J	BolC03g084320.2J
968	BolC06g017730.2J	BolC06g044590.2J	BolC04g043040.2J	BolC06g013860.2J	BolC01g056540.2J	BolC09g015940.2J
969	BolC03g041980.2J	BolC01g031440.2J	BolC01g048090.2J	BolC06g050500.2J	BolC07g037090.2J	BolC03g034740.2J
970	BolC09g058900.2J	BolC05g054240.2J	BolC09g031330.2J	BolC08g037880.2J	BolC01g048760.2J	BolC04g039680.2J
971	BolC06g044430.2J	BolC04g011780.2J	BolC08g035790.2J	BolC08g043610.2J	BolC09g010550.2J	BolC04g054520.2J
972	BolC07g050850.2J	BolC01g044780.2J	BolC03g045980.2J	BolC07g042280.2J	BolC04g009860.2J	BolC07g013600.2J
973	BolC05g013480.2J	BolC04g005760.2J	BolC06g042970.2J	BolC03g047120.2J	BolC09g061650.2J	BolC01g051170.2J
974	BolC05g045100.2J	BolC04g047100.2J	BolC03g043660.2J	BolC09g020690.2J	BolC02g001990.2J	BolC08g044200.2J
975	BolC09g006590.2J	BolC09g003720.2J	BolC07g009870.2J	BolC09g057480.2J	BolC05g019180.2J	BolC06g047110.2J
976	BolC05g056030.2J	BolC04g063900.2J	BolC06g029040.2J	BolC07g032770.2J	BolC09g062350.2J	BolC04g008820.2J
977	BolC04g013640.2J	BolC03g047110.2J	BolC03g058400.2J	BolC08g006660.2J	BolC08g054870.2J	BolC04g059350.2J
978	BolC03g043110.2J	BolC06g042610.2J	BolC03g004190.2J	BolC08g034210.2J	BolC09g020700.2J	BolC03g065640.2J
979	BolC03g035560.2J	BolC05g023970.2J	BolC02g013500.2J	BolC09g065400.2J	BolC01g007140.2J	BolC03g086760.2J
980	BolC03g027110.2J	BolC07g041260.2J	BolC02g055820.2J	BolC03g006600.2J	BolC04g038520.2J	BolC05g056350.2J
981	BolC04g017780.2J	BolC06g031980.2J	BolC08g053580.2J	BolC04g019690.2J	BolC05g008850.2J	BolC08g052210.2J
982	BolC02g045800.2J	BolC01g036960.2J	BolC08g046000.2J	BolC06g046970.2J	BolC02g024590.2J	BolC05g017480.2J
983	BolC04g058670.2J	BolC03g072930.2J	BolC07g011690.2J	BolC06g022920.2J	BolC08g059970.2J	BolC02g002860.2J
984	BolC02g062890.2J	BolC08g056010.2J	BolC01g053640.2J	BolC06g049050.2J	BolC01g005320.2J	BolC01g007930.2J
985	BolC07g048360.2J	BolC06g049090.2J	BolC07g060370.2J	BolC02g057410.2J	BolC02g028890.2J	BolC02g008270.2J
986	BolC07g037290.2J	BolC04g017860.2J	BolC04g055500.2J	BolC08g026310.2J	BolC07g021580.2J	BolCnng006760.2J
987	BolC09g040420.2J	BolC02g021370.2J	BolC03g067300.2J	BolC02g026280.2J	BolC06g028490.2J	BolC01g010140.2J
988	BolC04g066670.2J	BolC09g065030.2J	BolC03g000230.2J	BolC05g011020.2J	BolC01g051560.2J	BolC07g041890.2J
989	BolC01g007150.2J	BolC08g020790.2J	BolC09g026680.2J	BolC03g055050.2J	BolC04g049960.2J	BolC09g034060.2J
990	BolC09g010060.2J	BolC02g012950.2J	BolC05g057150.2J	BolC01g002280.2J	BolC02g000070.2J	BolC09g067330.2J
991	BolC09g001200.2J	BolC08g025420.2J	BolC07g021410.2J	BolC02g021870.2J	BolC02g018340.2J	BolC01g052560.2J
992	BolC09g051100.2J	BolC03g080540.2J	BolC06g029310.2J	BolC02g020130.2J	BolC01g046320.2J	BolC03g048150.2J
993	BolC03g073430.2J	BolC03g056850.2J	BolC05g058940.2J	BolC02g018460.2J	BolC04g008690.2J	BolC02g030170.2J
994	BolC06g049330.2J	BolC07g020590.2J	BolC03g006140.2J	BolC03g010180.2J	BolC03g047240.2J	BolC01g034980.2J
995	BolC09g067510.2J	BolC09g057760.2J	BolC01g050230.2J	BolC05g061650.2J	BolC05g050920.2J	BolC06g038540.2J
996	BolC09g049260.2J	BolC09g011020.2J	BolC05g015510.2J	BolC03g080040.2J	BolC03g028820.2J	BolC01g001500.2J
997	BolC02g022290.2J	BolC02g026740.2J	BolC02g005840.2J	BolC01g002390.2J	BolC07g060770.2J	BolC05g043430.2J
998	BolC03g009570.2J	BolC08g032960.2J	BolC02g034970.2J	BolC05g030500.2J	BolC05g044410.2J	BolC01g021210.2J
999	BolC01g016030.2J	BolC03g064030.2J	BolC02g001640.2J	BolC05g061860.2J	BolC03g019120.2J	BolC05g000760.2J
1000	BolC08g042350.2J	BolC01g027490.2J	BolC08g059690.2J	BolC06g045200.2J	BolC03g014700.2J	BolC03g073560.2J
1001	BolC04g035160.2J	BolC01g053320.2J	BolC02g008270.2J	BolC02g007240.2J	BolC04g020640.2J	BolC02g017680.2J
1002	BolC07g023390.2J	BolC08g032900.2J	BolC01g010270.2J	BolC05g022480.2J	BolC01g045610.2J	BolC09g015630.2J
1003	BolC02g056570.2J	BolC06g046050.2J	BolC04g027230.2J	BolC04g067080.2J	BolC04g006990.2J	BolC01g055240.2J
1004	BolC05g014680.2J	BolC09g032100.2J	BolC08g059720.2J	BolC05g060560.2J	BolC02g030610.2J	BolC07g037680.2J
1005	BolC03g076230.2J	BolC05g014490.2J	BolC09g005900.2J	BolC06g042440.2J	BolC04g065130.2J	BolC02g057460.2J
1006	BolC02g053580.2J	BolC05g005030.2J	BolC06g038390.2J	BolC02g029940.2J	BolC07g034680.2J	BolC09g068780.2J
1007	BolC08g039950.2J	BolC06g015360.2J	BolC09g009890.2J	BolC09g006000.2J	BolC03g005460.2J	BolC06g028650.2J
1008	BolC09g011720.2J	BolC07g041180.2J	BolC04g031090.2J	BolC04g041810.2J	BolC02g054540.2J	BolC03g017840.2J
1009	BolC09g000710.2J	BolC08g023800.2J	BolC03g007340.2J	BolC02g038420.2J	BolC09g007770.2J	BolC03g056280.2J
1010	BolC03g060860.2J	BolC03g004130.2J	BolC04g042560.2J	BolC07g044800.2J	BolC08g011700.2J	BolC04g007070.2J
1011	BolC07g059330.2J	BolC07g040750.2J	BolC04g030410.2J	BolC06g026910.2J	BolC02g059090.2J	BolC08g037000.2J
1012	BolC04g014160.2J	BolC02g004630.2J	BolC05g052400.2J	BolC02g000570.2J	BolC09g068350.2J	BolC04g008280.2J
1013	BolC06g009020.2J	BolC04g005580.2J	BolC04g067340.2J	BolC06g040750.2J	BolC02g000650.2J	BolC09g003310.2J
1014	BolC06g006270.2J	BolC03g069710.2J	BolC07g053090.2J	BolC03g075900.2J	BolC03g070830.2J	BolC06g021240.2J
1015	BolC04g005950.2J	BolC04g006110.2J	BolC07g013690.2J	BolC02g019890.2J	BolC03g006630.2J	BolC03g007070.2J
1016	BolC09g067620.2J	BolC09g063850.2J	BolC03g003400.2J	BolC04g004540.2J	BolC07g023220.2J	BolC02g010520.2J
1017	BolC06g046130.2J	BolC05g061720.2J	BolC01g018240.2J	BolC09g046600.2J	BolC04g063490.2J	BolC01g022890.2J
1018	BolC06g045100.2J	BolC03g023250.2J	BolC04g019780.2J	BolC06g050380.2J	BolC05g062060.2J	BolC05g013870.2J
1019	BolC03g043900.2J	BolC09g015500.2J	BolC02g001270.2J	BolC02g034570.2J	BolC05g000770.2J	BolC07g048000.2J
1020	BolC02g054830.2J	BolC05g020170.2J	BolC03g007280.2J	BolC01g000380.2J	BolC03g000830.2J	BolC08g007350.2J
1021	BolC03g073500.2J	BolC03g086540.2J	BolC05g061260.2J	BolC03g015650.2J	BolC02g045600.2J	BolC05g008440.2J
1022	BolC02g024990.2J	BolC09g009620.2J	BolC03g010890.2J	BolC09g008720.2J	BolC05g050940.2J	BolC01g004680.2J
1023	BolC08g046600.2J	BolC05g022050.2J	BolC03g000380.2J	BolC03g030530.2J	BolC05g049050.2J	BolC03g047410.2J
1024	BolC03g055280.2J	BolC03g009310.2J	BolC05g051470.2J	BolC01g050980.2J	BolC09g059260.2J	BolC06g028900.2J
1025	BolC08g056510.2J	BolC03g006950.2J	BolC06g014540.2J	BolC08g011240.2J	BolC07g054910.2J	BolCnng003980.2J
1026	BolC05g009180.2J	BolC06g031310.2J	BolC06g006080.2J	BolC07g049420.2J	BolC08g045770.2J	BolC08g031010.2J
1027	BolC03g019070.2J	BolC05g061090.2J	BolC07g013980.2J	BolC08g042620.2J	BolC04g068480.2J	BolC08g014200.2J
1028	BolC04g007930.2J	BolC09g010660.2J	BolC04g007120.2J	BolC02g008800.2J	BolC05g031990.2J	BolC03g071760.2J
1029	BolC03g010430.2J	BolC03g002690.2J	BolC01g006890.2J	BolC07g052330.2J	BolC04g026130.2J	BolC04g056230.2J
1030	BolC07g059080.2J	BolC07g044940.2J	BolC01g057040.2J	BolC05g032660.2J	BolC01g040800.2J	BolC07g014460.2J
1031	BolC05g009080.2J	BolC05g056460.2J	BolC05g017470.2J	BolC03g072900.2J	BolC03g083940.2J	BolC09g018360.2J
1032	BolC01g012860.2J	BolC03g059030.2J	BolC01g011230.2J	BolC09g001620.2J	BolC03g028600.2J	BolC01g002410.2J
1033	BolC05g033070.2J	BolC01g022920.2J	BolC01g005170.2J	BolC07g050450.2J	BolC01g049610.2J	BolC03g057110.2J
1034	BolC09g025090.2J	BolC01g020180.2J	BolC03g063910.2J	BolC07g036870.2J	BolC07g059650.2J	BolC03g015290.2J
1035	BolC06g039110.2J	BolC06g051150.2J	BolC03g006930.2J	BolC09g020750.2J	BolC05g000380.2J	BolC05g002440.2J
1036	BolC03g066840.2J	BolC08g055550.2J	BolC08g039990.2J	BolC07g005620.2J	BolC03g019090.2J	BolC08g036980.2J
1037	BolC03g055630.2J	BolC06g029460.2J	BolC08g046260.2J	BolC02g010510.2J	BolC07g036130.2J	BolC06g036510.2J
1038	BolC02g007160.2J	BolC03g060750.2J	BolC05g001350.2J	BolC03g003220.2J	BolC06g046630.2J	BolC05g053130.2J
1039	BolC02g025020.2J	BolC08g042310.2J	BolC06g037000.2J	BolC03g044470.2J	BolC03g010430.2J	BolC05g032040.2J
1040	BolC05g020400.2J	BolC03g077710.2J	BolC07g016750.2J	BolC07g052800.2J	BolC01g013840.2J	BolC05g001350.2J
1041	BolC02g004250.2J	BolC05g025980.2J	BolC05g056470.2J	BolC04g064360.2J	BolC01g018660.2J	BolC08g039790.2J
1042	BolC03g084990.2J	BolC05g012680.2J	BolC09g009690.2J	BolC09g032100.2J	BolC05g029270.2J	BolC03g013220.2J
1043	BolC04g055870.2J	BolC03g036430.2J	BolC03g006560.2J	BolC05g053480.2J	BolC07g019210.2J	BolC04g001930.2J
1044	BolC04g040290.2J	BolC03g002020.2J	BolC02g035230.2J	BolC05g009260.2J	BolC02g000310.2J	BolC07g044160.2J
1045	BolC07g005490.2J	BolC09g000960.2J	BolC04g051850.2J	BolC09g006050.2J	BolC04g054600.2J	BolC06g037540.2J
1046	BolC07g059340.2J	BolC04g041440.2J	BolC04g030130.2J	BolC07g005280.2J	BolC07g006280.2J	BolC09g013000.2J
1047	BolC05g017440.2J	BolC08g037680.2J	BolC09g048630.2J	BolC01g052570.2J	BolC07g025060.2J	BolC03g009440.2J
1048	BolC09g063710.2J	BolC04g051390.2J	BolC02g031110.2J	BolC08g029050.2J	BolC06g019130.2J	BolC04g000470.2J
1049	BolC06g018640.2J	BolC02g055790.2J	BolC04g003330.2J	BolC07g051440.2J	BolC07g005720.2J	BolC05g058950.2J
1050	BolC07g026770.2J	BolC01g000110.2J	BolC08g049330.2J	BolC05g032720.2J	BolC02g005010.2J	BolC03g002140.2J
1051	BolC07g026670.2J	BolC02g010330.2J	BolC06g038820.2J	BolC02g018350.2J	BolC06g046560.2J	BolC04g060620.2J
1052	BolC04g061730.2J	BolC01g015220.2J	BolC01g004050.2J	BolC05g057300.2J	BolC08g021360.2J	BolC07g048540.2J
1053	BolC06g033070.2J	BolC08g056300.2J	BolC03g082860.2J	BolC05g020950.2J	BolC02g059800.2J	BolC04g000710.2J
1054	BolC08g009260.2J	BolC06g049060.2J	BolC01g016290.2J	BolC04g040050.2J	BolC05g045240.2J	BolC04g054280.2J
1055	BolC03g040510.2J	BolC01g003600.2J	BolC01g007170.2J	BolC02g000540.2J	BolC07g042100.2J	BolC01g057590.2J
1056	BolC08g029770.2J	BolC09g028210.2J	BolC06g045040.2J	BolC04g042080.2J	BolC09g017580.2J	BolC07g052390.2J
1057	BolC03g049930.2J	BolC07g016010.2J	BolC06g038960.2J	BolC06g041360.2J	BolC03g021320.2J	BolC08g036410.2J
1058	BolC03g049010.2J	BolC04g055410.2J	BolC02g062840.2J	BolC04g023180.2J	BolC06g010380.2J	BolC04g063810.2J
1059	BolC09g000740.2J	BolC08g016610.2J	BolC05g019620.2J	BolC07g036390.2J	BolC04g064890.2J	BolC09g044640.2J
1060	BolC05g000740.2J	BolC07g042580.2J	BolC05g052880.2J	BolC04g039070.2J	BolC06g015910.2J	BolC09g046610.2J
1061	BolC09g008240.2J	BolC06g028840.2J	BolC07g053310.2J	BolC05g056920.2J	BolC02g043260.2J	BolC01g010450.2J
1062	BolC04g039840.2J	BolC09g032880.2J	BolC09g051740.2J	BolC01g044180.2J	BolC04g050600.2J	BolC05g003330.2J
1063	BolC01g041690.2J	BolC07g057550.2J	BolC07g041360.2J	BolC06g039690.2J	BolC03g042420.2J	BolC05g058460.2J
1064	BolC04g058840.2J	BolC05g003540.2J	BolC01g014070.2J	BolC08g030150.2J	BolC03g023370.2J	BolC03g037700.2J
1065	BolC07g049800.2J	BolC02g015390.2J	BolC04g055340.2J	BolC07g041680.2J	BolC04g011830.2J	BolC04g050900.2J
1066	BolC07g023350.2J	BolC04g015240.2J	BolC02g017120.2J	BolC04g030540.2J	BolC02g060240.2J	BolC07g003780.2J
1067	BolC03g043060.2J	BolC08g049510.2J	BolC04g034060.2J	BolC03g080470.2J	BolC02g052440.2J	BolC04g023870.2J
1068	BolC01g015320.2J	BolC05g006010.2J	BolC08g056830.2J	BolC04g063350.2J	BolC02g000840.2J	BolC09g005010.2J
1069	BolC08g059800.2J	BolC09g060490.2J	BolC01g018140.2J	BolC06g050510.2J	BolC03g078690.2J	BolC04g016170.2J
1070	BolC01g025910.2J	BolC02g029620.2J	BolC04g006920.2J	BolC01g011030.2J	BolC03g000340.2J	BolC07g022780.2J
1071	BolC07g005670.2J	BolC07g041550.2J	BolC02g004370.2J	BolC06g033180.2J	BolC04g018160.2J	BolC09g013830.2J
1072	BolC08g019210.2J	BolC09g068940.2J	BolC05g030770.2J	BolC05g034870.2J	BolC01g004140.2J	BolC07g006590.2J
1073	BolC07g021510.2J	BolC07g059130.2J	BolC08g020800.2J	BolC04g056220.2J	BolC08g019440.2J	BolC03g033800.2J
1074	BolC02g052560.2J	BolC05g063580.2J	BolC01g025310.2J	BolC03g027400.2J	BolC03g023420.2J	BolC03g020330.2J
1075	BolC07g023630.2J	BolC01g017940.2J	BolC04g040100.2J	BolC01g017140.2J	BolC09g054070.2J	BolC03g029380.2J
1076	BolC06g048780.2J	BolC08g015740.2J	BolC06g032220.2J	BolC08g044230.2J	BolC06g026910.2J	BolC09g011600.2J
1077	BolC09g061910.2J	BolC03g019430.2J	BolC08g045480.2J	BolC07g001810.2J	BolC08g039960.2J	BolCnng004830.2J
1078	BolC04g050080.2J	BolC05g005320.2J	BolC04g063130.2J	BolC04g005370.2J	BolC02g059780.2J	BolC03g068020.2J
1079	BolC09g057190.2J	BolC09g063500.2J	BolC01g016400.2J	BolC05g019550.2J	BolC08g038030.2J	BolC09g010010.2J
1080	BolC06g019110.2J	BolC07g026810.2J	BolC08g058680.2J	BolC02g058240.2J	BolC02g025780.2J	BolC09g011020.2J
1081	BolC06g005840.2J	BolC04g065370.2J	BolC07g058720.2J	BolC01g054840.2J	BolC01g030560.2J	BolC09g005900.2J
1082	BolC06g039080.2J	BolC08g008310.2J	BolC07g045550.2J	BolC06g045810.2J	BolC08g010700.2J	BolC05g021990.2J
1083	BolC08g019610.2J	BolC06g030560.2J	BolC05g028840.2J	BolC07g001460.2J	BolC06g039940.2J	BolC05g051100.2J
1084	BolC07g049330.2J	BolC08g036280.2J	BolC05g018650.2J	BolC04g023240.2J	BolC07g054030.2J	BolC01g053680.2J
1085	BolC08g039880.2J	BolC04g009960.2J	BolC03g033140.2J	BolC09g067340.2J	BolC07g018760.2J	BolC04g010720.2J
1086	BolC07g053640.2J	BolC02g030170.2J	BolC01g037020.2J	BolC02g052540.2J	BolC03g050550.2J	BolC03g053530.2J
1087	BolC02g058070.2J	BolC01g029830.2J	BolC06g040680.2J	BolC09g039770.2J	BolC08g020930.2J	BolC07g011550.2J
1088	BolC09g058660.2J	BolC03g001760.2J	BolC06g005850.2J	BolC08g010090.2J	BolC03g053460.2J	BolCnng004730.2J
1089	BolC03g007650.2J	BolC07g034240.2J	BolC03g016600.2J	BolC07g015480.2J	BolC07g038400.2J	BolC08g002860.2J
1090	BolC03g008060.2J	BolC04g012540.2J	BolC01g019500.2J	BolC05g012080.2J	BolC03g043400.2J	BolC03g043360.2J
1091	BolC09g018710.2J	BolC08g007840.2J	BolC02g043920.2J	BolC02g014070.2J	BolC07g030740.2J	BolC04g057850.2J
1092	BolC02g044790.2J	BolC06g028580.2J	BolC04g036820.2J	BolC04g043460.2J	BolC02g046020.2J	BolC07g057800.2J
1093	BolC08g044640.2J	BolC06g039170.2J	BolC03g053010.2J	BolC09g037690.2J	BolC01g001980.2J	BolC03g054170.2J
1094	BolC08g034360.2J	BolC03g074220.2J	BolC06g031870.2J	BolC05g048230.2J	BolC07g042750.2J	BolC07g050650.2J
1095	BolC06g033590.2J	BolC06g041410.2J	BolC04g047430.2J	BolC08g010940.2J	BolC02g048570.2J	BolC02g015390.2J
1096	BolC02g057960.2J	BolC08g052690.2J	BolC03g060860.2J	BolC01g042280.2J	BolC08g008640.2J	BolC07g015690.2J
1097	BolC07g051010.2J	BolC06g021240.2J	BolC03g001940.2J	BolC07g050740.2J	BolC01g000500.2J	BolC05g056950.2J
1098	BolC03g081140.2J	BolC04g011650.2J	BolC03g023000.2J	BolC09g010980.2J	BolC02g003350.2J	BolC06g050760.2J
1099	BolC06g010380.2J	BolC08g029520.2J	BolC03g070760.2J	BolC05g052490.2J	BolC01g025110.2J	BolC06g002900.2J
1100	BolC02g003260.2J	BolC08g004180.2J	BolC07g058810.2J	BolC04g001630.2J	BolC09g006600.2J	BolC08g012100.2J
1101	BolC04g005200.2J	BolC01g009700.2J	BolC03g031550.2J	BolC05g057270.2J	BolC09g000710.2J	BolC04g063120.2J
1102	BolC05g057680.2J	BolC03g021410.2J	BolC08g039950.2J	BolC02g014760.2J	BolC08g019070.2J	BolC03g058330.2J
1103	BolC03g059990.2J	BolC08g054930.2J	BolC01g000940.2J	BolC08g044690.2J	BolC09g024310.2J	BolC08g045320.2J
1104	BolC05g046210.2J	BolC07g003320.2J	BolC07g059090.2J	BolC03g031730.2J	BolC03g079880.2J	BolC08g043620.2J
1105	BolC04g046670.2J	BolC02g016710.2J	BolC01g029550.2J	BolC02g053890.2J	BolC09g057940.2J	BolC01g014110.2J
1106	BolC05g013980.2J	BolC03g048340.2J	BolC06g049970.2J	BolC04g056490.2J	BolC01g034300.2J	BolC03g063890.2J
1107	BolC06g021510.2J	BolC05g057610.2J	BolC02g057570.2J	BolC09g009660.2J	BolC05g009270.2J	BolC06g039700.2J
1108	BolC05g050920.2J	BolC04g001930.2J	BolC04g061860.2J	BolC06g000350.2J	BolC05g061250.2J	BolC09g056590.2J
1109	BolC02g063290.2J	BolC03g001130.2J	BolC01g032820.2J	BolC03g038300.2J	BolC08g022000.2J	BolC03g012250.2J
1110	BolC04g050260.2J	BolC08g039570.2J	BolC08g046080.2J	BolC09g038320.2J	BolC07g032530.2J	BolC02g057100.2J
1111	BolC08g044520.2J	BolC03g069490.2J	BolC06g018770.2J	BolC08g052960.2J	BolC02g005050.2J	BolC08g057270.2J
1112	BolC02g005150.2J	BolC07g005990.2J	BolC03g081970.2J	BolC01g003820.2J	BolC09g025070.2J	BolC02g002530.2J
1113	BolC06g039320.2J	BolC08g002850.2J	BolC08g039280.2J	BolC02g039190.2J	BolC04g007430.2J	BolC07g036500.2J
1114	BolC01g001660.2J	BolC03g068100.2J	BolC04g013540.2J	BolC03g044530.2J	BolC04g046290.2J	BolC08g056830.2J
1115	BolC01g024540.2J	BolC01g020290.2J	BolC01g025910.2J	BolC07g049520.2J	BolC03g020230.2J	BolC03g001410.2J
1116	BolC08g041000.2J	BolC03g021350.2J	BolC04g063190.2J	BolC06g038100.2J	BolC05g036600.2J	BolC03g067470.2J
1117	BolC02g015300.2J	BolC08g033620.2J	BolC05g059160.2J	BolC03g032060.2J	BolC02g019890.2J	BolC06g038390.2J
1118	BolC05g001900.2J	BolCnng004830.2J	BolC03g026600.2J	BolC04g008730.2J	BolC05g003080.2J	BolC09g051640.2J
1119	BolC01g048390.2J	BolC07g043590.2J	BolC04g056710.2J	BolC05g054570.2J	BolC03g066780.2J	BolC01g020160.2J
1120	BolC01g042110.2J	BolC01g014100.2J	BolC09g033860.2J	BolC08g022770.2J	BolC06g000350.2J	BolC04g009310.2J
1121	BolC02g016670.2J	BolC09g047880.2J	BolC06g017560.2J	BolC03g000340.2J	BolC03g078300.2J	BolC03g045750.2J
1122	BolC05g050940.2J	BolC09g042760.2J	BolC02g011090.2J	BolC03g028110.2J	BolC05g044180.2J	BolC06g032180.2J
1123	BolC02g033080.2J	BolC03g086410.2J	BolC09g009030.2J	BolC03g053110.2J	BolC07g002060.2J	BolC09g048040.2J
1124	BolC05g053170.2J	BolC04g041210.2J	BolC09g062230.2J	BolC06g011750.2J	BolC03g037960.2J	BolC08g018530.2J
1125	BolC03g073740.2J	BolC03g026560.2J	BolC05g026270.2J	BolC04g018980.2J	BolC06g046480.2J	BolC03g023850.2J
1126	BolC05g009540.2J	BolC01g011550.2J	BolC01g048330.2J	BolC09g003710.2J	BolC02g021540.2J	BolC04g048900.2J
1127	BolC08g038840.2J	BolC03g066490.2J	BolC02g050420.2J	BolC01g013770.2J	BolC02g001070.2J	BolC07g017220.2J
1128	BolC05g051420.2J	BolC04g010820.2J	BolC05g021660.2J	BolC01g023220.2J	BolC09g022200.2J	BolC03g005340.2J
1129	BolC07g060150.2J	BolC01g027400.2J	BolC07g039660.2J	BolC06g037300.2J	BolC03g017200.2J	BolC04g065370.2J
1130	BolC03g044540.2J	BolC06g019710.2J	BolC03g067020.2J	BolC09g011540.2J	BolC09g033630.2J	BolC09g020390.2J
1131	BolC09g018310.2J	BolC03g014620.2J	BolC02g005940.2J	BolC06g043090.2J	BolC01g000080.2J	BolC05g055940.2J
1132	BolC03g008080.2J	BolC02g001270.2J	BolC03g056860.2J	BolC03g014000.2J	BolC09g067020.2J	BolC02g037380.2J
1133	BolC04g026690.2J	BolC01g055240.2J	BolC03g031150.2J	BolC03g013230.2J	BolC07g045130.2J	BolC05g029110.2J
1134	BolC03g069070.2J	BolC03g016820.2J	BolC07g037350.2J	BolC01g002240.2J	BolC07g012160.2J	BolC05g060250.2J
1135	BolC01g016780.2J	BolC01g004150.2J	BolC01g027440.2J	BolC04g030930.2J	BolC01g026330.2J	BolC04g003330.2J
1136	BolC01g030560.2J	BolC07g037370.2J	BolC05g058950.2J	BolC06g006540.2J	BolC09g000020.2J	BolC08g011080.2J
1137	BolC05g015940.2J	BolC07g058270.2J	BolC09g019120.2J	BolC02g015850.2J	BolC03g016850.2J	BolC08g039990.2J
1138	BolC09g023820.2J	BolC07g041890.2J	BolC09g004000.2J	BolC01g008360.2J	BolC05g009340.2J	BolC02g032430.2J
1139	BolC07g025970.2J	BolC07g033180.2J	BolC07g053900.2J	BolC03g020930.2J	BolC05g015850.2J	BolCnng002510.2J
1140	BolC04g063940.2J	BolC03g064850.2J	BolC07g040930.2J	BolC02g054240.2J	BolC02g036390.2J	BolC07g007550.2J
1141	BolC06g003860.2J	BolC05g050280.2J	BolC07g048840.2J	BolC05g040550.2J	BolC01g029740.2J	BolC09g063500.2J
1142	BolC05g021440.2J	BolC03g007030.2J	BolC07g036760.2J	BolC09g009760.2J	BolC07g023020.2J	BolC02g058380.2J
1143	BolC02g021720.2J	BolC05g029110.2J	BolC05g020040.2J	BolC05g019530.2J	BolC02g034120.2J	BolC08g003360.2J
1144	BolC08g000430.2J	BolC07g002350.2J	BolC09g022970.2J	BolC04g044910.2J	BolC03g008320.2J	BolC03g063460.2J
1145	BolC03g005920.2J	BolC08g058910.2J	BolC02g003310.2J	BolC08g040460.2J	BolC09g013360.2J	BolC03g046910.2J
1146	BolC07g048470.2J	BolC07g038060.2J	BolC05g007020.2J	BolC03g046810.2J	BolC07g039060.2J	BolCnng003360.2J
1147	BolC03g048980.2J	BolC07g042280.2J	BolC06g025250.2J	BolC03g078010.2J	BolC05g011480.2J	BolC04g025480.2J
1148	BolC08g006290.2J	BolC04g028230.2J	BolC03g061430.2J	BolC01g003370.2J	BolC09g065110.2J	BolC07g041580.2J
1149	BolC04g023930.2J	BolC05g016790.2J	BolC04g020300.2J	BolC05g062360.2J	BolC06g042660.2J	BolC07g015680.2J
1150	BolC01g021750.2J	BolC09g024620.2J	BolC02g057540.2J	BolC03g000190.2J	BolC02g013510.2J	BolC03g062800.2J
1151	BolC01g050630.2J	BolC07g057320.2J	BolC03g071960.2J	BolC07g060300.2J	BolC03g002180.2J	BolC09g068820.2J
1152	BolC09g022220.2J	BolC04g029310.2J	BolC03g077960.2J	BolC09g007260.2J	BolC08g010930.2J	BolC04g021470.2J
1153	BolC08g052320.2J	BolC03g064140.2J	BolC03g020380.2J	BolC05g060130.2J	BolC04g022660.2J	BolC09g056910.2J
1154	BolC05g026550.2J	BolC03g043890.2J	BolC01g046450.2J	BolC03g028500.2J	BolC05g010810.2J	BolC02g017130.2J
1155	BolC09g002810.2J	BolC07g040380.2J	BolC03g070790.2J	BolC09g061060.2J	BolC03g029050.2J	BolC04g019310.2J
1156	BolC06g017220.2J	BolC04g021070.2J	BolC04g010720.2J	BolC03g074260.2J	BolC06g029450.2J	BolC05g043060.2J
1157	BolC08g046680.2J	BolC09g027960.2J	BolC03g001300.2J	BolC06g035160.2J	BolC05g011810.2J	BolC02g014330.2J
1158	BolC09g061650.2J	BolC08g002150.2J	BolC04g060180.2J	BolC01g033950.2J	BolC06g012430.2J	BolC09g029470.2J
1159	BolC01g050200.2J	BolC07g022580.2J	BolC01g005280.2J	BolC02g060360.2J	BolC05g027080.2J	BolC03g034770.2J
1160	BolC07g050470.2J	BolCnng004730.2J	BolC02g005820.2J	BolC01g006210.2J	BolC07g055300.2J	BolC07g039340.2J
1161	BolC07g041310.2J	BolC03g007190.2J	BolC08g046920.2J	BolC03g065180.2J	BolC08g048040.2J	BolC07g021440.2J
1162	BolC03g014330.2J	BolC04g012830.2J	BolC09g050650.2J	BolC03g002230.2J	BolC07g011500.2J	BolC07g045090.2J
1163	BolC03g069770.2J	BolC08g056500.2J	BolC07g054800.2J	BolC04g001250.2J	BolC08g011420.2J	BolC04g037680.2J
1164	BolC05g010410.2J	BolC03g022030.2J	BolC04g048600.2J	BolC09g007640.2J	BolC07g039600.2J	BolC05g023680.2J
1165	BolC06g003240.2J	BolC04g052890.2J	BolC06g048030.2J	BolC03g052830.2J	BolC08g027280.2J	BolC04g021490.2J
1166	BolC03g045800.2J	BolC01g003960.2J	BolC09g043290.2J	BolC09g069230.2J	BolC01g045000.2J	BolC07g032600.2J
1167	BolC03g053670.2J	BolC01g047090.2J	BolC02g058090.2J	BolC09g042580.2J	BolC05g001100.2J	BolC09g056110.2J
1168	BolC05g009170.2J	BolC08g043640.2J	BolC02g010280.2J	BolC03g075860.2J	BolC02g017770.2J	BolC03g071610.2J
1169	BolC03g024980.2J	BolC04g067920.2J	BolC09g056180.2J	BolC03g052030.2J	BolC09g026210.2J	BolC03g003240.2J
1170	BolC01g029550.2J	BolC03g003670.2J	BolC05g061130.2J	BolC03g032400.2J	BolC02g011080.2J	BolC03g057710.2J
1171	BolC08g015700.2J	BolC07g032390.2J	BolC04g043790.2J	BolC08g050180.2J	BolC06g018640.2J	BolC06g021300.2J
1172	BolC03g031050.2J	BolC03g003810.2J	BolC01g013850.2J	BolC08g025440.2J	BolC03g011740.2J	BolC07g021950.2J
1173	BolC03g022670.2J	BolC04g061650.2J	BolC05g044650.2J	BolC01g011710.2J	BolC07g034530.2J	BolC06g029420.2J
1174	BolC05g049880.2J	BolC04g007750.2J	BolC04g013860.2J	BolC02g011790.2J	BolC04g050940.2J	BolC01g004180.2J
1175	BolC09g061900.2J	BolC09g059920.2J	BolC09g016890.2J	BolC05g061220.2J	BolC09g001170.2J	BolC08g007390.2J
1176	BolC03g012510.2J	BolC03g016280.2J	BolC04g045920.2J	BolC09g054960.2J	BolC02g029940.2J	BolC07g049600.2J
1177	BolC04g049490.2J	BolC04g054400.2J	BolC05g053900.2J	BolC07g038330.2J	BolC08g023470.2J	BolC06g050880.2J
1178	BolC03g003030.2J	BolC06g003740.2J	BolC09g008630.2J	BolC07g036740.2J	BolC03g059540.2J	BolC08g001070.2J
1179	BolC03g070910.2J	BolC05g056360.2J	BolC05g057340.2J	BolC09g056350.2J	BolC09g006810.2J	BolC08g020710.2J
1180	BolC05g049760.2J	BolC09g060860.2J	BolC04g035690.2J	BolC09g001100.2J	BolC05g009290.2J	BolC03g086650.2J
1181	BolC07g057780.2J	BolC05g002740.2J	BolC04g025480.2J	BolC09g052180.2J	BolC09g047780.2J	BolC03g065650.2J
1182	BolC03g063610.2J	BolC05g055390.2J	BolC02g063450.2J	BolC03g056850.2J	BolC03g033960.2J	BolC06g040580.2J
1183	BolC02g050580.2J	BolC04g051850.2J	BolC05g055820.2J	BolC02g053620.2J	BolC03g019970.2J	BolC05g001720.2J
1184	BolC07g002510.2J	BolC07g052500.2J	BolC07g015680.2J	BolC01g052820.2J	BolC09g007510.2J	BolC09g021700.2J
1185	BolC01g056540.2J	BolC03g006730.2J	BolC01g044590.2J	BolC09g055120.2J	BolC06g038730.2J	BolC07g036650.2J
1186	BolC08g017750.2J	BolC08g060790.2J	BolC04g046550.2J	BolC08g050010.2J	BolC08g039100.2J	BolC03g019840.2J
1187	BolC08g017700.2J	BolC08g048350.2J	BolC05g043970.2J	BolC02g045690.2J	BolC06g050420.2J	BolC01g009670.2J
1188	BolC07g020530.2J	BolC07g053880.2J	BolC05g043740.2J	BolC09g021060.2J	BolC04g014620.2J	BolC05g039090.2J
1189	BolC09g028010.2J	BolC05g044040.2J	BolC03g012210.2J	BolC04g019420.2J	BolC09g009150.2J	BolC05g016160.2J
1190	BolC06g031350.2J	BolC02g005720.2J	BolC02g057910.2J	BolC03g046600.2J	BolC03g070100.2J	BolC03g022660.2J
1191	BolC03g005820.2J	BolC09g042740.2J	BolC03g086610.2J	BolC07g041050.2J	BolC02g000640.2J	BolC08g007910.2J
1192	BolC02g039660.2J	BolC05g018320.2J	BolC08g002850.2J	BolC09g042970.2J	BolC01g006660.2J	BolC08g028430.2J
1193	BolC09g018880.2J	BolC04g010610.2J	BolC01g033690.2J	BolC09g026090.2J	BolC05g005850.2J	BolCnng002320.2J
1194	BolC03g023550.2J	BolC03g038750.2J	BolC05g063220.2J	BolC02g053870.2J	BolC02g005540.2J	BolC09g016210.2J
1195	BolC04g034270.2J	BolC08g017200.2J	BolC05g000620.2J	BolC09g050510.2J	BolC05g010410.2J	BolC03g000430.2J
1196	BolC09g007790.2J	BolC05g014160.2J	BolC03g062740.2J	BolC09g057560.2J	BolC09g049680.2J	BolC05g014360.2J
1197	BolC04g058530.2J	BolC06g000930.2J	BolC05g004110.2J	BolC04g002200.2J	BolC09g009720.2J	BolC06g029040.2J
1198	BolC08g011140.2J	BolC06g029420.2J	BolC09g041060.2J	BolC08g015420.2J	BolC03g073480.2J	BolC03g015820.2J
1199	BolC08g034660.2J	BolC06g011250.2J	BolC07g044160.2J	BolC02g025980.2J	BolC08g036000.2J	BolC09g024180.2J
1200	BolC09g026720.2J	BolC02g029960.2J	BolC01g049110.2J	BolC05g045450.2J	BolC05g060130.2J	BolC04g020130.2J
1201	BolC02g034470.2J	BolC03g080620.2J	BolC05g000560.2J	BolC09g029670.2J	BolC04g031910.2J	BolC08g045180.2J
1202	BolC06g003890.2J	BolCnng002510.2J	BolC07g059320.2J	BolC09g030870.2J	BolC05g060710.2J	BolC06g006820.2J
1203	BolC09g066810.2J	BolC05g003640.2J	BolC06g046780.2J	BolC06g010350.2J	BolC05g061220.2J	BolC08g058600.2J
1204	BolC08g056930.2J	BolC03g076030.2J	BolC09g002140.2J	BolC09g011350.2J	BolC02g058240.2J	BolC08g007820.2J
1205	BolC04g066830.2J	BolCnng003360.2J	BolC05g033660.2J	BolC01g030180.2J	BolC09g034950.2J	BolC08g016970.2J
1206	BolC01g042430.2J	BolC06g049900.2J	BolC07g050140.2J	BolC06g023790.2J	BolC04g066240.2J	BolC04g050830.2J
1207	BolC09g022410.2J	BolC03g012250.2J	BolC06g032180.2J	BolC05g009020.2J	BolC01g055410.2J	BolC04g002830.2J
1208	BolC01g049860.2J	BolC04g013870.2J	BolC06g044510.2J	BolC04g021920.2J	BolC04g025020.2J	BolC04g002460.2J
1209	BolC07g043510.2J	BolC03g018860.2J	BolC03g070840.2J	BolC06g028970.2J	BolC04g056860.2J	BolC09g042110.2J
1210	BolC01g023210.2J	BolC04g063290.2J	BolC06g020690.2J	BolC03g006610.2J	BolC06g011750.2J	BolC03g064070.2J
1211	BolC05g056990.2J	BolC08g028440.2J	BolC06g043360.2J	BolC02g045550.2J	BolC06g030580.2J	BolC05g007670.2J
1212	BolC05g045410.2J	BolC04g050820.2J	BolC06g015070.2J	BolC02g032060.2J	BolC03g074010.2J	BolC03g010520.2J
1213	BolC01g012360.2J	BolC06g039950.2J	BolC04g031530.2J	BolC06g004010.2J	BolC03g023840.2J	BolC03g035850.2J
1214	BolC01g048990.2J	BolC05g010650.2J	BolC07g055640.2J	BolC09g035850.2J	BolC04g025260.2J	BolC04g067340.2J
1215	BolC06g050420.2J	BolC04g061940.2J	BolC02g004740.2J	BolC09g061930.2J	BolC08g045350.2J	BolC04g038020.2J
1216	BolC09g021310.2J	BolC08g025100.2J	BolC07g034690.2J	BolC02g001680.2J	BolC08g026980.2J	BolC05g002640.2J
1217	BolC09g067940.2J	BolC09g014360.2J	BolC03g055710.2J	BolC04g050520.2J	BolC03g073500.2J	BolC01g007170.2J
1218	BolC09g059260.2J	BolC06g038680.2J	BolC09g020000.2J	BolC04g014800.2J	BolC09g000150.2J	BolC03g049870.2J
1219	BolC08g057110.2J	BolC08g055240.2J	BolC05g034270.2J	BolC03g002900.2J	BolC07g003990.2J	BolC05g049240.2J
1220	BolC02g011110.2J	BolC04g006490.2J	BolC06g005480.2J	BolC08g030120.2J	BolC03g083080.2J	BolC05g020170.2J
1221	BolC03g020940.2J	BolC08g055820.2J	BolC09g029100.2J	BolC02g025400.2J	BolC04g028430.2J	BolC08g002330.2J
1222	BolC09g067580.2J	BolC06g020390.2J	BolC05g051330.2J	BolC02g009640.2J	BolC01g022860.2J	BolC03g012200.2J
1223	BolC03g031550.2J	BolC04g044850.2J	BolC05g041280.2J	BolC09g061950.2J	BolC09g064390.2J	BolC03g036130.2J
1224	BolC04g056840.2J	BolC01g050660.2J	BolC04g044940.2J	BolC07g047400.2J	BolC07g034410.2J	BolC06g028510.2J
1225	BolC02g034510.2J	BolC08g014960.2J	BolC03g045530.2J	BolC05g006660.2J	BolC06g041340.2J	BolC05g004110.2J
1226	BolC02g049710.2J	BolC03g044620.2J	BolC04g015510.2J	BolC08g027910.2J	BolC02g012080.2J	BolC06g030250.2J
1227	BolC06g046480.2J	BolC07g043460.2J	BolC07g046390.2J	BolC08g017050.2J	BolC07g037910.2J	BolC03g029010.2J
1228	BolC05g020890.2J	BolCnng002320.2J	BolC03g018720.2J	BolC04g032630.2J	BolC08g008630.2J	BolC05g006350.2J
1229	BolC09g035120.2J	BolC02g037380.2J	BolC03g006590.2J	BolC06g033390.2J	BolC07g055130.2J	BolC02g010500.2J
1230	BolC03g074680.2J	BolCnng002910.2J	BolC05g058190.2J	BolC05g050900.2J	BolC03g000850.2J	BolC04g017860.2J
1231	BolC05g026340.2J	BolC04g047080.2J	BolC07g015690.2J	BolC05g013710.2J	BolC04g003400.2J	BolC05g013580.2J
1232	BolC03g043810.2J	BolC06g043950.2J	BolC07g043580.2J	BolC05g056160.2J	BolC01g051710.2J	BolC03g059030.2J
1233	BolC06g033190.2J	BolC09g068780.2J	BolC01g000260.2J	BolC04g027460.2J	BolC07g007520.2J	BolC08g033010.2J
1234	BolC06g044020.2J	BolC06g048940.2J	BolC06g033730.2J	BolC05g063510.2J	BolC09g059730.2J	BolC07g050860.2J
1235	BolC03g060310.2J	BolC03g034770.2J	BolC01g018340.2J	BolC08g056010.2J	BolC07g029450.2J	BolC09g011080.2J
1236	BolC05g028290.2J	BolC02g046050.2J	BolC07g026090.2J	BolC08g056780.2J	BolC03g001190.2J	BolC01g031750.2J
1237	BolC08g035910.2J	BolCnng000930.2J	BolC02g017630.2J	BolC09g052400.2J	BolC01g056080.2J	BolC04g051720.2J
1238	BolC01g051930.2J	BolC07g056430.2J	BolC03g010990.2J	BolC09g030340.2J	BolC02g037690.2J	BolC02g023040.2J
1239	BolC04g035040.2J	BolC03g036820.2J	BolC05g045640.2J	BolC02g043990.2J	BolC06g027250.2J	BolC06g006600.2J
1240	BolC04g008990.2J	BolC02g057100.2J	BolC07g043240.2J	BolC03g032250.2J	BolC09g052840.2J	BolC05g052170.2J
1241	BolC04g018060.2J	BolC04g035250.2J	BolC03g036190.2J	BolC01g030300.2J	BolC07g044530.2J	BolC04g065900.2J
1242	BolC09g060530.2J	BolC02g013600.2J	BolC05g043060.2J	BolC04g009920.2J	BolC08g029510.2J	BolC08g043640.2J
1243	BolC05g023580.2J	BolC08g034470.2J	BolC01g015470.2J	BolC07g054430.2J	BolC05g008020.2J	BolC01g002920.2J
1244	BolC08g048720.2J	BolC02g002740.2J	BolC01g022250.2J	BolC03g037690.2J	BolC01g006170.2J	BolC09g006750.2J
1245	BolC08g059970.2J	BolC05g013870.2J	BolC02g011800.2J	BolC06g039120.2J	BolC04g063540.2J	BolC09g051190.2J
1246	BolC06g012430.2J	BolC08g017940.2J	BolC07g032600.2J	BolC01g025060.2J	BolC02g021850.2J	BolC04g048770.2J
1247	BolC06g046630.2J	BolC06g012730.2J	BolC01g056800.2J	BolC08g022000.2J	BolC05g015890.2J	BolC01g055300.2J
1248	BolC01g052290.2J	BolC02g028100.2J	BolC05g062150.2J	BolC07g051050.2J	BolC04g034190.2J	BolC04g048950.2J
1249	BolC03g016890.2J	BolC03g059830.2J	BolC04g063770.2J	BolC04g062420.2J	BolC03g086810.2J	BolC07g055560.2J
1250	BolC06g008580.2J	BolCnng002420.2J	BolC06g031940.2J	BolC04g011660.2J	BolC07g056230.2J	BolC05g013620.2J
1251	BolC01g003430.2J	BolC03g045290.2J	BolC08g023170.2J	BolC03g042690.2J	BolC02g013520.2J	BolC09g039670.2J
1252	BolC09g010930.2J	BolC09g068530.2J	BolC05g054540.2J	BolC02g029480.2J	BolC05g050890.2J	BolC05g039450.2J
1253	BolC08g032040.2J	BolC02g007790.2J	BolC08g054840.2J	BolC05g058810.2J	BolC07g005330.2J	BolC08g042790.2J
1254	BolC04g012620.2J	BolC03g037640.2J	BolC06g021730.2J	BolC01g053960.2J	BolC02g056810.2J	BolC08g018510.2J
1255	BolC07g039060.2J	BolC06g035580.2J	BolC09g060270.2J	BolC03g033280.2J	BolC03g046270.2J	BolC01g026350.2J
1256	BolC07g039040.2J	BolC06g014400.2J	BolC07g050980.2J	BolC04g056150.2J	BolC03g002980.2J	BolC04g038650.2J
1257	BolC08g027390.2J	BolC06g021300.2J	BolC03g079060.2J	BolC04g034910.2J	BolC08g020100.2J	BolC08g039850.2J
1258	BolC04g052780.2J	BolC05g060470.2J	BolC04g068670.2J	BolC09g014350.2J	BolC06g009150.2J	BolC09g029960.2J
1259	BolC07g042960.2J	BolC06g048870.2J	BolC09g002820.2J	BolC09g069170.2J	BolC06g041330.2J	BolC05g059610.2J
1260	BolC03g076290.2J	BolC08g033610.2J	BolC09g029440.2J	BolC07g043700.2J	BolC03g041950.2J	BolC05g012680.2J
1261	BolC08g018920.2J	BolC04g065530.2J	BolC09g041450.2J	BolC04g053820.2J	BolC04g017120.2J	BolC09g009890.2J
1262	BolC08g011310.2J	BolC04g059400.2J	BolC04g067360.2J	BolC04g001140.2J	BolC01g012330.2J	BolC01g013910.2J
1263	BolC03g043100.2J	BolC03g028710.2J	BolC02g008290.2J	BolC07g021570.2J	BolC09g001980.2J	BolC06g022280.2J
1264	BolC03g005780.2J	BolC08g028230.2J	BolC01g000170.2J	BolC01g010300.2J	BolC03g029890.2J	BolC04g013440.2J
1265	BolC04g012560.2J	BolC01g019910.2J	BolC09g011080.2J	BolC04g007940.2J	BolC01g019090.2J	BolC07g034560.2J
1266	BolC07g005970.2J	BolC05g027000.2J	BolC03g062790.2J	BolC02g013210.2J	BolC09g051100.2J	BolC04g012330.2J
1267	BolC01g002140.2J	BolC02g049960.2J	BolC02g029100.2J	BolC07g050460.2J	BolC07g024920.2J	BolC02g023380.2J
1268	BolC04g055280.2J	BolC09g004940.2J	BolC05g053880.2J	BolC03g080070.2J	BolC01g007080.2J	BolC06g048430.2J
1269	BolC04g033560.2J	BolC08g048090.2J	BolC06g035510.2J	BolC09g056670.2J	BolC02g060360.2J	BolC05g055600.2J
1270	BolC07g017400.2J	BolC04g037670.2J	BolC03g049080.2J	BolC04g059160.2J	BolC05g033580.2J	BolC08g046190.2J
1271	BolC05g048150.2J	BolC09g015000.2J	BolC02g043280.2J	BolC03g021690.2J	BolC07g031930.2J	BolC01g019440.2J
1272	BolC01g008670.2J	BolC09g017380.2J	BolC02g055970.2J	BolC03g023250.2J	BolC04g058530.2J	BolC04g051810.2J
1273	BolC03g078710.2J	BolC04g010930.2J	BolC04g029940.2J	BolC03g034340.2J	BolCnng004700.2J	BolC09g024620.2J
1274	BolC03g078700.2J	BolC01g004820.2J	BolC06g048520.2J	BolC03g052520.2J	BolC04g063740.2J	BolC08g049250.2J
1275	BolC06g040130.2J	BolC05g026490.2J	BolC03g056280.2J	BolC07g052670.2J	BolC05g036270.2J	BolC01g027070.2J
1276	BolC03g035750.2J	BolC08g043620.2J	BolC01g034980.2J	BolC09g069250.2J	BolC07g042120.2J	BolC07g024220.2J
1277	BolC09g004840.2J	BolC08g043590.2J	BolC09g013080.2J	BolC07g048990.2J	BolC02g045720.2J	BolC06g044130.2J
1278	BolC09g048160.2J	BolC05g006180.2J	BolC05g018400.2J	BolC02g002590.2J	BolC08g011140.2J	BolC08g046920.2J
1279	BolC05g019130.2J	BolC08g019450.2J	BolC03g018690.2J	BolC09g063690.2J	BolC04g043580.2J	BolC03g057580.2J
1280	BolC01g057430.2J	BolC07g010610.2J	BolC03g011430.2J	BolC08g035360.2J	BolC06g038330.2J	BolC09g014060.2J
1281	BolC05g050230.2J	BolC03g015080.2J	BolC06g046960.2J	BolC03g007710.2J	BolC09g042700.2J	BolC06g027150.2J
1282	BolC05g014960.2J	BolC07g013600.2J	BolC02g056570.2J	BolC06g018240.2J	BolC05g013020.2J	BolC03g020760.2J
1283	BolC02g054390.2J	BolC01g054220.2J	BolC06g047770.2J	BolC08g046170.2J	BolC04g067130.2J	BolC08g013730.2J
1284	BolC04g062870.2J	BolC06g016060.2J	BolC07g026860.2J	BolC03g034680.2J	BolC03g014840.2J	BolC03g048320.2J
1285	BolC02g058040.2J	BolC03g065650.2J	BolC03g012990.2J	BolC05g038100.2J	BolC09g006420.2J	BolC06g037670.2J
1286	BolC01g041120.2J	BolC09g028200.2J	BolC03g018660.2J	BolC08g039940.2J	BolC08g025980.2J	BolC04g061440.2J
1287	BolC03g060290.2J	BolC06g042510.2J	BolC09g019890.2J	BolC09g060800.2J	BolC03g012510.2J	BolC02g005440.2J
1288	BolC01g047360.2J	BolC08g000090.2J	BolC01g011490.2J	BolC09g069410.2J	BolC08g026600.2J	BolC01g001230.2J
1289	BolC04g045920.2J	BolC03g010470.2J	BolC05g023900.2J	BolC07g020100.2J	BolC08g045590.2J	BolC04g022810.2J
1290	BolC01g013020.2J	BolC08g060430.2J	BolC04g060310.2J	BolC03g074290.2J	BolC09g043890.2J	BolC05g036240.2J
1291	BolC01g014640.2J	BolC02g010520.2J	BolC08g009160.2J	BolC06g039530.2J	BolC04g068230.2J	BolC09g034760.2J
1292	BolC01g039790.2J	BolC09g039770.2J	BolC09g035350.2J	BolC04g032650.2J	BolC04g004410.2J	BolC04g018670.2J
1293	BolC08g034340.2J	BolC04g025240.2J	BolC05g016090.2J	BolC02g015140.2J	BolC05g057400.2J	BolC03g075980.2J
1294	BolC06g000360.2J	BolC03g018760.2J	BolC07g021950.2J	BolC09g009180.2J	BolC05g031400.2J	BolC09g025950.2J
1295	BolC03g056550.2J	BolC08g051580.2J	BolC03g034610.2J	BolC09g064440.2J	BolC01g041650.2J	BolC06g011250.2J
1296	BolC01g002210.2J	BolC06g044200.2J	BolC02g058900.2J	BolC06g042890.2J	BolC06g030130.2J	BolC02g022280.2J
1297	BolC02g022160.2J	BolC05g007330.2J	BolC08g056270.2J	BolC04g007350.2J	BolC09g018660.2J	BolC08g030950.2J
1298	BolC07g036940.2J	BolC04g056230.2J	BolC05g059090.2J	BolC04g012730.2J	BolC02g012680.2J	BolC04g055770.2J
1299	BolC05g061360.2J	BolC08g031640.2J	BolC08g032080.2J	BolC09g042980.2J	BolC04g027460.2J	BolC02g005850.2J
1300	BolC02g016090.2J	BolC07g054900.2J	BolC04g014680.2J	BolC09g053450.2J	BolC08g013870.2J	BolC01g053940.2J
1301	BolC02g024640.2J	BolC03g005160.2J	BolC04g066720.2J	BolC03g012340.2J	BolC09g002840.2J	BolC05g028610.2J
1302	BolC01g004430.2J	BolC03g054080.2J	BolC07g021510.2J	BolC06g029960.2J	BolC02g049640.2J	BolC08g013770.2J
1303	BolC06g039120.2J	BolC04g037830.2J	BolC09g031150.2J	BolC03g083230.2J	BolC03g031050.2J	BolC03g034990.2J
1304	BolC03g005660.2J	BolC02g023380.2J	BolC09g038810.2J	BolC06g039100.2J	BolC09g010960.2J	BolC07g016630.2J
1305	BolC01g033080.2J	BolC09g046340.2J	BolC09g063100.2J	BolC04g006560.2J	BolC04g047650.2J	BolC02g017720.2J
1306	BolC06g046960.2J	BolC02g004380.2J	BolC05g056970.2J	BolC09g006850.2J	BolC09g002770.2J	BolC04g012670.2J
1307	BolC07g016740.2J	BolC02g009860.2J	BolC09g026640.2J	BolC02g015780.2J	BolC05g029590.2J	BolC08g025470.2J
1308	BolC08g046950.2J	BolC06g050160.2J	BolC08g049420.2J	BolC08g051650.2J	BolC08g038150.2J	BolC05g063290.2J
1309	BolC03g000230.2J	BolC09g008530.2J	BolC03g002140.2J	BolC04g059320.2J	BolC09g046630.2J	BolC08g000680.2J
1310	BolC07g000910.2J	BolC01g057240.2J	BolC05g003330.2J	BolC01g030930.2J	BolC02g049750.2J	BolC06g042010.2J
1311	BolC03g049940.2J	BolC09g012420.2J	BolC08g037830.2J	BolC04g021620.2J	BolC02g051940.2J	BolC09g030000.2J
1312	BolC04g043580.2J	BolC03g005150.2J	BolC07g043090.2J	BolC08g019270.2J	BolC03g004970.2J	BolC09g002030.2J
1313	BolC07g009240.2J	BolC02g004900.2J	BolC02g002530.2J	BolC03g046270.2J	BolC06g032600.2J	BolC04g030460.2J
1314	BolC01g000190.2J	BolC03g018470.2J	BolC05g060760.2J	BolC08g053000.2J	BolC04g012960.2J	BolC05g017330.2J
1315	BolC07g060110.2J	BolC03g039920.2J	BolC07g040320.2J	BolC03g029210.2J	BolC01g018840.2J	BolC08g035790.2J
1316	BolC02g006890.2J	BolC01g012380.2J	BolC07g014460.2J	BolC06g045220.2J	BolC08g021470.2J	BolC02g025880.2J
1317	BolC09g040660.2J	BolC01g023360.2J	BolC08g052020.2J	BolC02g060290.2J	BolC05g004830.2J	BolC06g032160.2J
1318	BolC08g020100.2J	BolC02g048350.2J	BolC02g056970.2J	BolC08g005540.2J	BolC09g039660.2J	BolC03g030590.2J
1319	BolC05g023500.2J	BolC06g051140.2J	BolC04g014670.2J	BolC08g018080.2J	BolC05g056040.2J	BolC07g044620.2J
1320	BolC03g067430.2J	BolC05g016160.2J	BolC08g034450.2J	BolC02g047310.2J	BolC02g015340.2J	BolC04g056010.2J
1321	BolC04g060180.2J	BolC06g050240.2J	BolC01g015030.2J	BolC09g037650.2J	BolC08g026620.2J	BolC09g042830.2J
1322	BolC02g013620.2J	BolC09g047310.2J	BolC02g012060.2J	BolC02g003450.2J	BolC08g020570.2J	BolC08g039570.2J
1323	BolC07g058570.2J	BolC08g023780.2J	BolC06g033350.2J	BolC05g024650.2J	BolC06g042130.2J	BolC01g008130.2J
1324	BolC08g031750.2J	BolC01g021380.2J	BolC07g057830.2J	BolC08g000280.2J	BolC09g022220.2J	BolC01g011600.2J
1325	BolC03g003580.2J	BolC06g044130.2J	BolC02g028050.2J	BolC07g025340.2J	BolC09g045860.2J	BolC08g056370.2J
1326	BolC06g022320.2J	BolC01g013910.2J	BolC07g049820.2J	BolC04g056260.2J	BolC01g039790.2J	BolC06g022490.2J
1327	BolC07g053850.2J	BolC09g066170.2J	BolC02g002380.2J	BolC01g002750.2J	BolC08g024840.2J	BolC01g010560.2J
1328	BolC02g024370.2J	BolC05g027010.2J	BolC06g034120.2J	BolC05g039640.2J	BolC02g016660.2J	BolC08g031390.2J
1329	BolC03g024400.2J	BolC01g011710.2J	BolC01g004820.2J	BolC03g018640.2J	BolC09g053460.2J	BolC08g047570.2J
1330	BolC09g064110.2J	BolC03g036610.2J	BolC09g032590.2J	BolC07g055650.2J	BolC05g057970.2J	BolC09g008810.2J
1331	BolC04g020520.2J	BolC07g006390.2J	BolC04g031280.2J	BolC06g027210.2J	BolC05g063400.2J	BolC07g021940.2J
1332	BolC07g058260.2J	BolC02g017330.2J	BolC02g027560.2J	BolC03g018670.2J	BolC03g071560.2J	BolC02g004170.2J
1333	BolC01g045820.2J	BolC08g040440.2J	BolC03g035130.2J	BolC04g046670.2J	BolC06g015650.2J	BolC01g006500.2J
1334	BolC06g000550.2J	BolC03g039110.2J	BolC05g037930.2J	BolC08g025610.2J	BolC06g016140.2J	BolC05g004820.2J
1335	BolC06g041330.2J	BolC01g010890.2J	BolC05g050190.2J	BolC04g029330.2J	BolC04g012550.2J	BolC09g035590.2J
1336	BolC07g059650.2J	BolC01g032390.2J	BolC08g028440.2J	BolC06g049010.2J	BolC09g037920.2J	BolC07g057550.2J
1337	BolC04g050930.2J	BolC02g005410.2J	BolC02g012950.2J	BolC06g041340.2J	BolC01g015030.2J	BolC03g019110.2J
1338	BolC05g043540.2J	BolC03g014930.2J	BolC09g063990.2J	BolC01g027710.2J	BolC02g003930.2J	BolC08g043590.2J
1339	BolC02g044290.2J	BolC09g063990.2J	BolC06g031050.2J	BolC07g032210.2J	BolC08g014690.2J	BolC05g003350.2J
1340	BolC01g037830.2J	BolC01g044660.2J	BolC07g034220.2J	BolC05g037680.2J	BolC06g005140.2J	BolC03g085440.2J
1341	BolC03g042950.2J	BolC06g015660.2J	BolC08g001030.2J	BolC01g002170.2J	BolC07g020650.2J	BolC07g059020.2J
1342	BolC06g045270.2J	BolC03g005210.2J	BolC08g019750.2J	BolC03g065870.2J	BolC08g047770.2J	BolC04g061030.2J
1343	BolC08g036900.2J	BolC09g025990.2J	BolC07g022650.2J	BolC03g015670.2J	BolC05g016540.2J	BolC06g017960.2J
1344	BolC03g058680.2J	BolC06g006820.2J	BolC03g063880.2J	BolC04g001110.2J	BolC09g009760.2J	BolC02g052620.2J
1345	BolC02g003160.2J	BolC03g068030.2J	BolC02g046240.2J	BolC03g049070.2J	BolC07g031880.2J	BolC08g055820.2J
1346	BolC06g007760.2J	BolC03g022740.2J	BolC02g058070.2J	BolC03g050810.2J	BolC09g049000.2J	BolC03g057300.2J
1347	BolC07g054350.2J	BolC02g014330.2J	BolC01g018780.2J	BolC03g049010.2J	BolC05g060320.2J	BolC04g029940.2J
1348	BolC09g020700.2J	BolC08g048500.2J	BolC08g005050.2J	BolC03g004360.2J	BolC05g009590.2J	BolC06g050160.2J
1349	BolC01g000720.2J	BolC09g062140.2J	BolC01g024120.2J	BolC04g063090.2J	BolC04g043060.2J	BolC07g042420.2J
1350	BolC07g040620.2J	BolC07g038980.2J	BolC08g022420.2J	BolC09g061990.2J	BolC06g021200.2J	BolC07g050770.2J
1351	BolC01g000080.2J	BolC04g022190.2J	BolC02g057960.2J	BolC09g018520.2J	BolC04g017630.2J	BolC04g067920.2J
1352	BolC02g045550.2J	BolC06g044320.2J	BolC08g039700.2J	BolC01g048360.2J	BolC01g013250.2J	BolC01g029860.2J
1353	BolC06g014120.2J	BolC02g024660.2J	BolC03g020760.2J	BolC03g031240.2J	BolC03g020270.2J	BolC02g007650.2J
1354	BolC07g043230.2J	BolC09g027170.2J	BolC09g067260.2J	BolC08g049680.2J	BolC09g011240.2J	BolC01g007830.2J
1355	BolC08g020930.2J	BolC02g063360.2J	BolC07g004630.2J	BolC06g039070.2J	BolC07g011240.2J	BolC01g023360.2J
1356	BolC05g048340.2J	BolC07g039020.2J	BolC03g055130.2J	BolC09g034900.2J	BolC03g001460.2J	BolC08g020790.2J
1357	BolC06g031330.2J	BolC03g014250.2J	BolC06g011180.2J	BolC08g014690.2J	BolC07g036940.2J	BolC02g034970.2J
1358	BolC03g047580.2J	BolC08g048400.2J	BolC03g028380.2J	BolC04g013380.2J	BolC08g059420.2J	BolC03g045290.2J
1359	BolC01g002380.2J	BolC08g001130.2J	BolC06g035980.2J	BolC03g046100.2J	BolC06g033320.2J	BolC07g058610.2J
1360	BolC09g009370.2J	BolC02g023700.2J	BolC03g049780.2J	BolC06g007300.2J	BolC03g005690.2J	BolC03g085460.2J
1361	BolC03g065870.2J	BolC08g036250.2J	BolC01g048390.2J	BolC03g005000.2J	BolC04g048890.2J	BolC02g005410.2J
1362	BolC02g045540.2J	BolC08g012440.2J	BolC06g022490.2J	BolC07g056080.2J	BolC03g001830.2J	BolC02g002030.2J
1363	BolC05g009270.2J	BolC09g063920.2J	BolC03g003620.2J	BolC01g002730.2J	BolC03g021510.2J	BolC08g001750.2J
1364	BolC01g008780.2J	BolC01g002510.2J	BolC06g040860.2J	BolC08g049100.2J	BolC03g046510.2J	BolC03g078100.2J
1365	BolC07g013620.2J	BolC08g030680.2J	BolC08g035860.2J	BolC08g035270.2J	BolC01g055670.2J	BolC05g005220.2J
1366	BolC03g083660.2J	BolC03g032140.2J	BolC09g000390.2J	BolC09g024190.2J	BolC09g036830.2J	BolC09g010660.2J
1367	BolC03g009940.2J	BolC01g056040.2J	BolC04g061420.2J	BolC02g035250.2J	BolC07g028040.2J	BolC07g021890.2J
1368	BolC07g031380.2J	BolC04g007180.2J	BolC03g001410.2J	BolC09g054990.2J	BolC05g061240.2J	BolC09g022060.2J
1369	BolC04g057170.2J	BolC06g029190.2J	BolC04g023580.2J	BolC09g011250.2J	BolC03g042970.2J	BolC03g066300.2J
1370	BolC03g029890.2J	BolC05g042930.2J	BolC09g064000.2J	BolC04g024800.2J	BolC04g060660.2J	BolC04g030880.2J
1371	BolC08g025980.2J	BolC02g007140.2J	BolC04g053270.2J	BolC03g075750.2J	BolC06g038740.2J	BolC08g055670.2J
1372	BolC01g005260.2J	BolC09g055230.2J	BolC02g055390.2J	BolC08g047480.2J	BolC07g042960.2J	BolC03g028700.2J
1373	BolC06g038330.2J	BolC05g005840.2J	BolC08g039190.2J	BolC02g037720.2J	BolC08g025070.2J	BolC05g060700.2J
1374	BolC07g037260.2J	BolC09g000450.2J	BolC02g006140.2J	BolC09g033660.2J	BolC03g055040.2J	BolC01g021380.2J
1375	BolC05g030350.2J	BolC01g039890.2J	BolC08g017690.2J	BolC06g007650.2J	BolC04g051040.2J	BolC03g018470.2J
1376	BolC02g020040.2J	BolC02g052950.2J	BolC04g031560.2J	BolC09g013340.2J	BolC09g008290.2J	BolC09g064430.2J
1377	BolC01g001340.2J	BolC04g012720.2J	BolC09g029450.2J	BolC08g043490.2J	BolC02g012410.2J	BolC08g032480.2J
1378	BolC02g004440.2J	BolC06g023470.2J	BolC06g008550.2J	BolC04g015250.2J	BolC02g055420.2J	BolC03g068030.2J
1379	BolC04g062550.2J	BolCnng002680.2J	BolC09g061880.2J	BolC09g046120.2J	BolC03g006640.2J	BolC02g009450.2J
1380	BolC06g028300.2J	BolC09g029160.2J	BolC09g042690.2J	BolC03g023570.2J	BolC03g042550.2J	BolC08g026760.2J
1381	BolC09g015040.2J	BolC06g009090.2J	BolC01g018770.2J	BolC05g060750.2J	BolC03g055960.2J	BolC05g018320.2J
1382	BolC07g056010.2J	BolC08g027980.2J	BolC03g048740.2J	BolC09g010300.2J	BolC03g003040.2J	BolC04g037720.2J
1383	BolC01g006790.2J	BolC07g058670.2J	BolC01g035470.2J	BolC02g015370.2J	BolC02g004930.2J	BolC07g014220.2J
1384	BolC01g016580.2J	BolC07g014860.2J	BolC01g030270.2J	BolC05g037670.2J	BolC07g043680.2J	BolC02g063560.2J
1385	BolC04g031040.2J	BolC04g061440.2J	BolC09g051060.2J	BolC04g061500.2J	BolC08g025730.2J	BolC09g051160.2J
1386	BolC01g043530.2J	BolC04g011620.2J	BolC08g037850.2J	BolC05g005950.2J	BolC08g042490.2J	BolC05g059120.2J
1387	BolC09g061870.2J	BolC05g001200.2J	BolC03g046910.2J	BolC06g007640.2J	BolC03g003060.2J	BolC05g010600.2J
1388	BolC04g014680.2J	BolC03g072670.2J	BolC03g038690.2J	BolC02g058640.2J	BolC02g021140.2J	BolC03g050270.2J
1389	BolC03g062970.2J	BolC01g027560.2J	BolC02g016510.2J	BolC04g067870.2J	BolC08g019610.2J	BolC09g068160.2J
1390	BolC07g007470.2J	BolC02g061810.2J	BolC05g006630.2J	BolC08g055940.2J	BolC05g061360.2J	BolC06g020390.2J
1391	BolC03g068200.2J	BolC01g032410.2J	BolC04g043810.2J	BolC03g051910.2J	BolC05g012480.2J	BolC07g012590.2J
1392	BolC05g015450.2J	BolC08g059520.2J	BolC03g077630.2J	BolC08g013250.2J	BolC08g000150.2J	BolC08g013260.2J
1393	BolC06g012420.2J	BolC05g011270.2J	BolC06g045060.2J	BolC08g025100.2J	BolC09g066130.2J	BolC01g013030.2J
1394	BolC09g019800.2J	BolC08g039860.2J	BolC07g029130.2J	BolC07g019320.2J	BolC07g018350.2J	BolC06g012730.2J
1395	BolC03g053340.2J	BolC02g039480.2J	BolC04g002930.2J	BolC01g021810.2J	BolC05g059320.2J	BolC07g021660.2J
1396	BolC08g000150.2J	BolC04g002400.2J	BolC05g053710.2J	BolC07g046630.2J	BolC03g074450.2J	BolC08g037840.2J
1397	BolC01g013250.2J	BolCnng003310.2J	BolC01g000240.2J	BolC09g005870.2J	BolC07g022100.2J	BolC09g069340.2J
1398	BolC03g020140.2J	BolC08g030930.2J	BolC01g050670.2J	BolC05g005540.2J	BolC07g056050.2J	BolC04g049480.2J
1399	BolC07g045970.2J	BolC08g050100.2J	BolC01g005210.2J	BolC02g020440.2J	BolC05g010160.2J	BolC02g009610.2J
1400	BolC02g039690.2J	BolC05g060220.2J	BolC06g042150.2J	BolC09g052980.2J	BolC01g057430.2J	BolC05g054300.2J
1401	BolC03g028810.2J	BolC09g028470.2J	BolC07g023430.2J	BolC06g005560.2J	BolC04g003290.2J	BolC03g077560.2J
1402	BolC03g061780.2J	BolC09g014880.2J	BolC08g023010.2J	BolC07g018990.2J	BolC04g020230.2J	BolC04g024660.2J
1403	BolC02g015340.2J	BolC03g034610.2J	BolC05g005980.2J	BolC05g002630.2J	BolC03g052760.2J	BolC08g055240.2J
1404	BolC07g042100.2J	BolC09g059590.2J	BolC05g021020.2J	BolC05g005240.2J	BolC03g055050.2J	BolC01g022900.2J
1405	BolC06g042150.2J	BolC03g071060.2J	BolC02g044590.2J	BolC04g059390.2J	BolC09g061930.2J	BolC02g014220.2J
1406	BolC01g008770.2J	BolC09g020400.2J	BolC05g005920.2J	BolC09g048170.2J	BolC04g041630.2J	BolC09g010670.2J
1407	BolC01g052950.2J	BolC02g002380.2J	BolC02g029130.2J	BolC09g065010.2J	BolC06g017950.2J	BolC03g056740.2J
1408	BolC02g001070.2J	BolC09g000940.2J	BolC07g022520.2J	BolC05g024660.2J	BolC09g028640.2J	BolC02g021120.2J
1409	BolC06g048070.2J	BolC03g023830.2J	BolC03g045760.2J	BolC09g010760.2J	BolC02g007780.2J	BolC04g006100.2J
1410	BolC04g048890.2J	BolC03g072370.2J	BolC03g015080.2J	BolC05g019330.2J	BolC06g051020.2J	BolC04g023330.2J
1411	BolC03g082050.2J	BolC03g028640.2J	BolC05g005890.2J	BolC08g057570.2J	BolC07g016090.2J	BolC09g026680.2J
1412	BolC01g016540.2J	BolC08g005980.2J	BolC03g024350.2J	BolC01g037420.2J	BolC08g045310.2J	BolC02g043780.2J
1413	BolC02g040490.2J	BolC09g044770.2J	BolC06g007680.2J	BolC01g002830.2J	BolC07g037640.2J	BolC05g003640.2J
1414	BolC04g031910.2J	BolC09g003360.2J	BolC04g018920.2J	BolC03g062870.2J	BolC08g011240.2J	BolC04g022230.2J
1415	BolC01g001190.2J	BolC02g004890.2J	BolC09g051340.2J	BolC02g058490.2J	BolC05g015450.2J	BolC05g018620.2J
1416	BolC03g045760.2J	BolC02g024750.2J	BolC06g038980.2J	BolC06g010290.2J	BolC03g013670.2J	BolC05g063250.2J
1417	BolC01g032840.2J	BolC09g007600.2J	BolC03g023380.2J	BolC09g040380.2J	BolC03g079100.2J	BolC05g006140.2J
1418	BolC04g028630.2J	BolC09g063480.2J	BolC05g063040.2J	BolC04g060770.2J	BolC09g009430.2J	BolC09g069190.2J
1419	BolC02g059780.2J	BolCnng003980.2J	BolC04g034200.2J	BolC04g068380.2J	BolC03g065560.2J	BolC08g041030.2J
1420	BolC09g043890.2J	BolC09g013910.2J	BolC03g058830.2J	BolC04g048280.2J	BolC06g015810.2J	BolC06g024440.2J
1421	BolC01g018770.2J	BolC03g081530.2J	BolC04g068580.2J	BolC08g017960.2J	BolC05g051500.2J	BolC06g050460.2J
1422	BolC07g041900.2J	BolC08g040070.2J	BolC05g062310.2J	BolC02g060670.2J	BolC06g044810.2J	BolC03g053410.2J
1423	BolC06g018520.2J	BolC03g019840.2J	BolC07g059660.2J	BolC02g004670.2J	BolC04g063560.2J	BolC07g060760.2J
1424	BolC08g009510.2J	BolC09g045830.2J	BolC08g019620.2J	BolC09g066660.2J	BolC09g028010.2J	BolC03g022070.2J
1425	BolC07g004810.2J	BolC02g057140.2J	BolC07g033500.2J	BolC02g002030.2J	BolC07g048150.2J	BolC03g020690.2J
1426	BolC04g064730.2J	BolC05g063020.2J	BolC03g020300.2J	BolC03g074130.2J	BolC03g080780.2J	BolC08g036720.2J
1427	BolC04g058240.2J	BolC09g064540.2J	BolC06g039000.2J	BolC02g036630.2J	BolC08g008060.2J	BolC08g000090.2J
1428	BolC05g018470.2J	BolC08g012430.2J	BolC03g056120.2J	BolC07g057390.2J	BolC04g007830.2J	BolC09g011100.2J
1429	BolC08g024220.2J	BolC09g013000.2J	BolC04g021840.2J	BolC06g001850.2J	BolC09g056850.2J	BolC09g025350.2J
1430	BolC04g065620.2J	BolC05g051320.2J	BolC02g022280.2J	BolC01g018040.2J	BolC04g052990.2J	BolC08g033250.2J
1431	BolC07g011290.2J	BolC03g004630.2J	BolC01g057180.2J	BolC07g019630.2J	BolC09g061700.2J	BolC02g000060.2J
1432	BolC09g058030.2J	BolC05g017890.2J	BolC02g013070.2J	BolC08g055510.2J	BolC04g043460.2J	BolC05g021150.2J
1433	BolC03g003400.2J	BolC03g023850.2J	BolC03g016830.2J	BolC02g004500.2J	BolC08g042580.2J	BolC03g013010.2J
1434	BolC03g079100.2J	BolC05g002610.2J	BolC03g068040.2J	BolC02g060750.2J	BolC07g007930.2J	BolC01g006890.2J
1435	BolC04g014640.2J	BolC07g043770.2J	BolC06g013870.2J	BolC05g015640.2J	BolC08g034740.2J	BolC03g008130.2J
1436	BolC02g049750.2J	BolC06g006830.2J	BolC03g041690.2J	BolC05g019870.2J	BolC06g047320.2J	BolC03g085470.2J
1437	BolC04g055170.2J	BolC03g027610.2J	BolC01g046690.2J	BolC08g050110.2J	BolC06g010850.2J	BolC07g001790.2J
1438	BolC07g021990.2J	BolC05g029320.2J	BolC07g034400.2J	BolC03g002210.2J	BolC03g032490.2J	BolC06g036650.2J
1439	BolC03g048680.2J	BolC05g000620.2J	BolC09g004700.2J	BolC03g080110.2J	BolC06g032250.2J	BolC01g037900.2J
1440	BolC09g006720.2J	BolC09g004800.2J	BolC09g002450.2J	BolC08g040210.2J	BolC06g031650.2J	BolC04g043040.2J
1441	BolC03g030420.2J	BolC01g033770.2J	BolC05g008560.2J	BolC01g033080.2J	BolC02g004250.2J	BolC03g018950.2J
1442	BolC05g021780.2J	BolC03g063270.2J	BolC03g023550.2J	BolC05g014440.2J	BolC07g000910.2J	BolC08g049510.2J
1443	BolC08g052610.2J	BolC05g009780.2J	BolC06g036370.2J	BolC01g010920.2J	BolC03g043650.2J	BolCnng003330.2J
1444	BolC06g017560.2J	BolC07g054740.2J	BolC01g001660.2J	BolC04g016090.2J	BolC02g044010.2J	BolC09g009020.2J
1445	BolC08g034210.2J	BolC08g002550.2J	BolC04g003090.2J	BolC02g049840.2J	BolC03g036530.2J	BolC06g004200.2J
1446	BolC03g085400.2J	BolC07g015870.2J	BolC03g085430.2J	BolC05g011270.2J	BolC02g028540.2J	BolC09g033740.2J
1447	BolC08g056320.2J	BolC07g052510.2J	BolC03g028970.2J	BolC07g017650.2J	BolC07g038000.2J	BolC06g040590.2J
1448	BolC03g002980.2J	BolC08g037200.2J	BolC01g025670.2J	BolC09g067130.2J	BolC04g006850.2J	BolC03g053930.2J
1449	BolC09g031130.2J	BolC08g035740.2J	BolC04g019210.2J	BolC09g052370.2J	BolC09g046380.2J	BolC01g029830.2J
1450	BolC04g005440.2J	BolC03g038890.2J	BolC07g051780.2J	BolC01g005580.2J	BolC03g053050.2J	BolC02g020630.2J
1451	BolC04g004540.2J	BolC09g048170.2J	BolC03g043510.2J	BolC01g054720.2J	BolC02g022170.2J	BolC02g044990.2J
1452	BolC05g004150.2J	BolC09g042400.2J	BolC08g017740.2J	BolC06g040870.2J	BolC04g058670.2J	BolC02g023260.2J
1453	BolC09g069200.2J	BolC04g040720.2J	BolC03g072250.2J	BolC02g019670.2J	BolC04g055170.2J	BolC01g018850.2J
1454	BolC06g011920.2J	BolC07g041810.2J	BolC06g041090.2J	BolC06g012090.2J	BolC08g019210.2J	BolC04g024670.2J
1455	BolC02g045690.2J	BolC01g047740.2J	BolC02g013490.2J	BolC07g050610.2J	BolC07g011900.2J	BolC07g017190.2J
1456	BolC08g060260.2J	BolC02g041140.2J	BolC08g019160.2J	BolC09g066600.2J	BolC01g024330.2J	BolC06g028580.2J
1457	BolC05g013020.2J	BolC01g026540.2J	BolC08g005410.2J	BolC03g036280.2J	BolC08g033580.2J	BolC07g028080.2J
1458	BolC03g021030.2J	BolC08g058830.2J	BolC01g042240.2J	BolC09g057970.2J	BolC07g048430.2J	BolC01g010270.2J
1459	BolC08g019410.2J	BolC09g009500.2J	BolC09g026230.2J	BolC07g013020.2J	BolC05g011850.2J	BolC04g066950.2J
1460	BolC04g012920.2J	BolC01g053430.2J	BolC02g023700.2J	BolC04g022390.2J	BolC03g048520.2J	BolC09g042240.2J
1461	BolC03g032700.2J	BolC01g029510.2J	BolC05g049830.2J	BolC01g039780.2J	BolC06g027360.2J	BolC07g060690.2J
1462	BolC08g058040.2J	BolC02g025890.2J	BolC05g024310.2J	BolC01g017770.2J	BolC09g056890.2J	BolC02g002490.2J
1463	BolC02g056220.2J	BolCnng002430.2J	BolC04g060970.2J	BolC01g039140.2J	BolC07g001170.2J	BolC02g055790.2J
1464	BolC03g079880.2J	BolC02g018940.2J	BolC02g003160.2J	BolC02g034810.2J	BolC09g065140.2J	BolC06g044200.2J
1465	BolC09g021320.2J	BolC06g045350.2J	BolC03g045070.2J	BolC02g029500.2J	BolC03g065730.2J	BolC02g060900.2J
1466	BolC06g008570.2J	BolC09g060800.2J	BolC01g050350.2J	BolC02g016460.2J	BolC05g020950.2J	BolC09g005310.2J
1467	BolC09g053880.2J	BolC07g034820.2J	BolC03g022390.2J	BolC01g011840.2J	BolC09g055070.2J	BolC06g049780.2J
1468	BolC04g015310.2J	BolC09g020500.2J	BolC09g001350.2J	BolC05g010510.2J	BolC07g047140.2J	BolC07g033500.2J
1469	BolC06g035640.2J	BolC01g027170.2J	BolC05g063890.2J	BolC07g044040.2J	BolC08g038830.2J	BolC03g081530.2J
1470	BolC04g029620.2J	BolC01g005560.2J	BolC06g030120.2J	BolC09g065060.2J	BolC03g032590.2J	BolC05g014470.2J
1471	BolC02g053590.2J	BolC06g039250.2J	BolC05g031270.2J	BolC03g027550.2J	BolC01g002380.2J	BolC02g040600.2J
1472	BolC05g027980.2J	BolC09g004790.2J	BolC01g052930.2J	BolC01g008070.2J	BolC04g050080.2J	BolC09g001320.2J
1473	BolC06g033690.2J	BolC09g021870.2J	BolC06g048040.2J	BolC07g050390.2J	BolC07g054350.2J	BolC04g068730.2J
1474	BolC09g024100.2J	BolC06g032160.2J	BolC06g030920.2J	BolC06g019890.2J	BolC07g060500.2J	BolC06g048010.2J
1475	BolC06g024410.2J	BolC08g003200.2J	BolC04g045590.2J	BolC04g034190.2J	BolC05g033400.2J	BolC09g007780.2J
1476	BolC06g022710.2J	BolC07g022520.2J	BolC02g021860.2J	BolC05g055890.2J	BolC05g008470.2J	BolC03g019800.2J
1477	BolC02g029880.2J	BolC08g020600.2J	BolC08g004180.2J	BolC02g022090.2J	BolC09g026720.2J	BolC03g008070.2J
1478	BolC07g030160.2J	BolC05g016200.2J	BolC06g015100.2J	BolC06g026030.2J	BolC03g019220.2J	BolC02g034350.2J
1479	BolC05g010700.2J	BolC09g068540.2J	BolC03g024620.2J	BolC01g013380.2J	BolC09g016720.2J	BolC01g047090.2J
1480	BolC06g017990.2J	BolC08g057580.2J	BolC04g061900.2J	BolC01g001950.2J	BolC09g017810.2J	BolC07g034400.2J
1481	BolC04g004820.2J	BolC06g006470.2J	BolC02g007390.2J	BolC07g059910.2J	BolC03g032430.2J	BolC08g044030.2J
1482	BolC07g001570.2J	BolC08g050180.2J	BolC06g038940.2J	BolC07g034950.2J	BolC09g067930.2J	BolC03g035180.2J
1483	BolC03g068220.2J	BolC07g034130.2J	BolC04g060480.2J	BolC01g009010.2J	BolC03g028110.2J	BolC05g021500.2J
1484	BolC08g026750.2J	BolC07g040700.2J	BolC05g002680.2J	BolC06g014420.2J	BolC01g009900.2J	BolC09g016930.2J
1485	BolC07g013350.2J	BolC09g013050.2J	BolC01g015310.2J	BolC07g035840.2J	BolC04g061610.2J	BolC01g003640.2J
1486	BolC03g031150.2J	BolC03g006480.2J	BolC06g024210.2J	BolC05g004590.2J	BolC01g046140.2J	BolC09g008590.2J
1487	BolC09g062560.2J	BolC05g005010.2J	BolC01g049860.2J	BolC02g008450.2J	BolC01g007560.2J	BolC06g021530.2J
1488	BolC03g023470.2J	BolC08g030900.2J	BolC08g023040.2J	BolC04g042330.2J	BolC01g053570.2J	BolC06g038350.2J
1489	BolC02g058880.2J	BolC04g064360.2J	BolC03g043360.2J	BolC07g049480.2J	BolC06g008720.2J	BolC07g033180.2J
1490	BolC01g057230.2J	BolC01g010880.2J	BolC04g020100.2J	BolC07g052560.2J	BolC07g001570.2J	BolC03g039630.2J
1491	BolC09g043680.2J	BolC07g028390.2J	BolC04g052800.2J	BolC01g026430.2J	BolC07g035150.2J	BolC07g014210.2J
1492	BolC05g051330.2J	BolC05g063700.2J	BolC01g019160.2J	BolC05g003140.2J	BolC06g046600.2J	BolC02g011610.2J
1493	BolC03g020010.2J	BolC09g004050.2J	BolC09g010890.2J	BolC08g001990.2J	BolC03g033850.2J	BolC07g055070.2J
1494	BolC03g086430.2J	BolC01g051040.2J	BolC03g048340.2J	BolC06g001840.2J	BolC01g016750.2J	BolC04g013870.2J
1495	BolC08g050670.2J	BolC07g005710.2J	BolC07g012420.2J	BolC08g028710.2J	BolC01g010500.2J	BolC07g044930.2J
1496	BolC01g002590.2J	BolC01g015360.2J	BolC08g018530.2J	BolC05g052910.2J	BolC01g035200.2J	BolC04g011780.2J
1497	BolC07g019210.2J	BolC05g034160.2J	BolC08g049970.2J	BolC03g047010.2J	BolC04g061870.2J	BolC07g027990.2J
1498	BolC06g018990.2J	BolC04g018290.2J	BolC08g036790.2J	BolC09g019520.2J	BolC03g065920.2J	BolC04g011130.2J
1499	BolC02g039030.2J	BolC07g047400.2J	BolC01g000720.2J	BolC03g022200.2J	BolC08g031750.2J	BolC02g006750.2J
1500	BolC05g052620.2J	BolC08g015610.2J	BolC03g028990.2J	BolC02g038270.2J	BolC03g020140.2J	BolC02g016020.2J
1501	BolC09g041160.2J	BolC08g021980.2J	BolC09g045740.2J	BolC02g005950.2J	BolC01g034460.2J	BolC06g020190.2J
1502	BolC04g028560.2J	BolC04g001890.2J	BolC08g045820.2J	BolC07g054900.2J	BolC02g044350.2J	BolC04g063900.2J
1503	BolC09g002440.2J	BolC09g039670.2J	BolC01g022490.2J	BolC07g024920.2J	BolC05g015940.2J	BolC09g008180.2J
1504	BolC07g035550.2J	BolC05g048920.2J	BolC04g055620.2J	BolC01g036140.2J	BolC04g055650.2J	BolC02g008440.2J
1505	BolC03g061310.2J	BolC08g036790.2J	BolC04g058950.2J	BolC02g061100.2J	BolC04g011660.2J	BolC04g055320.2J
1506	BolC05g053100.2J	BolC07g058450.2J	BolC02g016940.2J	BolC03g043830.2J	BolC09g016670.2J	BolC01g055100.2J
1507	BolC09g001700.2J	BolC08g020800.2J	BolC09g003850.2J	BolC02g057810.2J	BolC07g030900.2J	BolC05g044420.2J
1508	BolC06g020700.2J	BolC03g072560.2J	BolC04g023560.2J	BolC06g030000.2J	BolC06g049100.2J	BolC04g057800.2J
1509	BolC04g008000.2J	BolC04g035090.2J	BolC09g029960.2J	BolC09g048060.2J	BolC07g042670.2J	BolC08g039980.2J
1510	BolC09g053970.2J	BolC07g042490.2J	BolC04g035210.2J	BolC06g030510.2J	BolC02g025020.2J	BolC09g006980.2J
1511	BolC05g015850.2J	BolC08g024370.2J	BolC09g010370.2J	BolC03g000060.2J	BolC03g023630.2J	BolC02g027680.2J
1512	BolC08g009200.2J	BolC04g005110.2J	BolC06g017380.2J	BolC04g008780.2J	BolC05g007240.2J	BolC04g048600.2J
1513	BolC01g011230.2J	BolC07g039950.2J	BolC01g046300.2J	BolC02g019210.2J	BolC05g024680.2J	BolC07g030980.2J
1514	BolC04g033220.2J	BolC03g021760.2J	BolC09g004570.2J	BolC04g038370.2J	BolC04g019370.2J	BolC08g036100.2J
1515	BolC04g007830.2J	BolC08g050200.2J	BolC03g034190.2J	BolC02g045780.2J	BolC01g002210.2J	BolC05g043530.2J
1516	BolC01g056840.2J	BolC01g002020.2J	BolC05g007900.2J	BolC01g002870.2J	BolC08g001920.2J	BolC08g042340.2J
1517	BolC05g022780.2J	BolC01g013320.2J	BolC01g046190.2J	BolC01g017030.2J	BolC03g069640.2J	BolC07g056840.2J
1518	BolC04g006870.2J	BolC02g060750.2J	BolC04g005440.2J	BolC07g030050.2J	BolC08g007940.2J	BolC03g076090.2J
1519	BolC04g031320.2J	BolC07g055380.2J	BolC05g004730.2J	BolC04g031730.2J	BolC09g006640.2J	BolC02g030080.2J
1520	BolC01g010130.2J	BolC09g004140.2J	BolC07g017020.2J	BolC05g059140.2J	BolC04g012620.2J	BolC02g019740.2J
1521	BolC03g016850.2J	BolC05g032590.2J	BolC01g032470.2J	BolC01g027170.2J	BolC01g034830.2J	BolC03g041550.2J
1522	BolC09g031150.2J	BolC06g046420.2J	BolC02g050830.2J	BolC04g036230.2J	BolC04g042320.2J	BolC09g050650.2J
1523	BolC04g020970.2J	BolC05g058940.2J	BolC03g081330.2J	BolC02g003960.2J	BolC09g062460.2J	BolC05g059070.2J
1524	BolC06g006540.2J	BolC03g032760.2J	BolC02g011590.2J	BolC07g016500.2J	BolC06g034750.2J	BolC09g014220.2J
1525	BolC02g014830.2J	BolC08g042770.2J	BolC01g046700.2J	BolC01g015170.2J	BolC08g055730.2J	BolC06g030790.2J
1526	BolC04g027710.2J	BolC05g026580.2J	BolC04g064680.2J	BolC09g037750.2J	BolC01g003580.2J	BolC04g044140.2J
1527	BolC06g033980.2J	BolC06g021530.2J	BolC02g037670.2J	BolC06g038090.2J	BolC06g024990.2J	BolC09g033140.2J
1528	BolC09g001630.2J	BolC03g077080.2J	BolC06g039300.2J	BolC04g008610.2J	BolC03g061070.2J	BolC08g044940.2J
1529	BolC02g039670.2J	BolC07g024940.2J	BolC03g057140.2J	BolC07g021350.2J	BolC05g012080.2J	BolC07g058880.2J
1530	BolC07g055180.2J	BolC05g018620.2J	BolC03g001690.2J	BolC03g083110.2J	BolC01g052820.2J	BolC05g060740.2J
1531	BolC08g002450.2J	BolC07g049610.2J	BolC07g054100.2J	BolC02g022740.2J	BolC01g004430.2J	BolC03g001490.2J
1532	BolC02g011100.2J	BolC02g031030.2J	BolC05g039700.2J	BolC02g062630.2J	BolC02g031210.2J	BolC07g040380.2J
1533	BolC05g016090.2J	BolC05g046240.2J	BolC08g018620.2J	BolC08g007490.2J	BolC04g043360.2J	BolC05g001370.2J
1534	BolC01g018660.2J	BolC08g028010.2J	BolC05g021040.2J	BolC03g027460.2J	BolC03g022670.2J	BolC09g040210.2J
1535	BolC06g044810.2J	BolC02g060370.2J	BolC03g035750.2J	BolC09g037640.2J	BolC06g027920.2J	BolC07g003650.2J
1536	BolC01g004980.2J	BolC06g048960.2J	BolC05g029340.2J	BolC01g002960.2J	BolC07g051420.2J	BolC01g047000.2J
1537	BolC09g069520.2J	BolC01g034780.2J	BolC07g056990.2J	BolC08g034010.2J	BolC08g028000.2J	BolC07g051620.2J
1538	BolC09g050850.2J	BolC05g021990.2J	BolC01g048380.2J	BolC05g010600.2J	BolC04g009270.2J	BolC04g005580.2J
1539	BolC07g005460.2J	BolC09g010650.2J	BolC05g040770.2J	BolC09g030290.2J	BolC03g046770.2J	BolC09g004790.2J
1540	BolC02g039730.2J	BolC03g065640.2J	BolC06g045010.2J	BolC05g051220.2J	BolC07g059370.2J	BolC05g055100.2J
1541	BolC01g036880.2J	BolC06g007470.2J	BolC04g025980.2J	BolC03g080150.2J	BolC01g006990.2J	BolC03g035470.2J
1542	BolC09g028640.2J	BolC04g017080.2J	BolC03g015430.2J	BolC09g025700.2J	BolC06g044080.2J	BolC08g011130.2J
1543	BolC01g014490.2J	BolC09g064260.2J	BolC09g026970.2J	BolC08g026970.2J	BolC08g017090.2J	BolC08g055340.2J
1544	BolC02g036390.2J	BolC04g059810.2J	BolC09g006990.2J	BolC03g081040.2J	BolC02g028730.2J	BolC07g049750.2J
1545	BolC09g000150.2J	BolC01g047910.2J	BolC03g022350.2J	BolC07g037380.2J	BolC08g019180.2J	BolC02g000870.2J
1546	BolC09g056010.2J	BolC02g007070.2J	BolC04g062360.2J	BolC01g032410.2J	BolC04g047330.2J	BolC05g048930.2J
1547	BolC08g025890.2J	BolC02g039250.2J	BolC09g031170.2J	BolC01g039370.2J	BolC02g022100.2J	BolC03g050660.2J
1548	BolC06g006240.2J	BolC01g020210.2J	BolC05g001040.2J	BolC03g044600.2J	BolC04g028630.2J	BolC06g033470.2J
1549	BolC03g007560.2J	BolC08g053780.2J	BolC08g027310.2J	BolC07g044700.2J	BolC02g053620.2J	BolC06g004400.2J
1550	BolC07g058560.2J	BolC01g015310.2J	BolC03g014920.2J	BolC07g015080.2J	BolC02g010620.2J	BolC08g045740.2J
1551	BolC09g046320.2J	BolC04g028050.2J	BolC09g009670.2J	BolC01g028840.2J	BolC08g030260.2J	BolC04g030660.2J
1552	BolC02g014730.2J	BolC07g021350.2J	BolC03g006660.2J	BolC01g028900.2J	BolC04g053380.2J	BolC05g010460.2J
1553	BolC08g037120.2J	BolC03g057700.2J	BolC09g038000.2J	BolC02g027880.2J	BolC07g055170.2J	BolC03g082480.2J
1554	BolC07g053630.2J	BolC03g012210.2J	BolC07g003780.2J	BolC07g049550.2J	BolC09g031290.2J	BolC03g026400.2J
1555	BolC03g009860.2J	BolC03g024330.2J	BolC08g026370.2J	BolC05g047120.2J	BolC02g000270.2J	BolC02g058990.2J
1556	BolC05g050550.2J	BolC09g061570.2J	BolC09g062560.2J	BolC02g019650.2J	BolC03g075900.2J	BolC01g005360.2J
1557	BolC08g045210.2J	BolC08g029100.2J	BolC01g020970.2J	BolC03g010710.2J	BolC08g053260.2J	BolC08g025640.2J
1558	BolC02g006880.2J	BolC03g026740.2J	BolC02g010730.2J	BolC03g082560.2J	BolC08g024020.2J	BolC06g038910.2J
1559	BolC05g058830.2J	BolC02g004470.2J	BolC09g014850.2J	BolC05g052700.2J	BolC03g058390.2J	BolC03g026750.2J
1560	BolC02g004820.2J	BolC01g057040.2J	BolC09g053970.2J	BolC02g063260.2J	BolC06g033690.2J	BolC04g038080.2J
1561	BolC01g006980.2J	BolC09g034780.2J	BolC04g063150.2J	BolC02g036240.2J	BolC08g030310.2J	BolC07g016230.2J
1562	BolC04g001620.2J	BolC08g040120.2J	BolC05g060400.2J	BolC09g025710.2J	BolC02g054870.2J	BolC04g021070.2J
1563	BolC05g021380.2J	BolC04g061790.2J	BolC01g051800.2J	BolC05g022420.2J	BolC09g003790.2J	BolC08g036890.2J
1564	BolC07g022250.2J	BolC06g027150.2J	BolC08g033380.2J	BolC05g032240.2J	BolC05g008310.2J	BolC08g002150.2J
1565	BolC09g062520.2J	BolC09g004640.2J	BolC05g002830.2J	BolC03g034510.2J	BolC04g053010.2J	BolC07g044640.2J
1566	BolC09g053830.2J	BolC09g065240.2J	BolC08g046750.2J	BolC04g007740.2J	BolC07g016100.2J	BolC09g039630.2J
1567	BolC02g052750.2J	BolC08g055670.2J	BolC09g015960.2J	BolC03g069120.2J	BolC05g011820.2J	BolC03g004340.2J
1568	BolC08g005330.2J	BolC03g042110.2J	BolC08g032440.2J	BolC06g034630.2J	BolC05g058020.2J	BolC01g003950.2J
1569	BolC04g002620.2J	BolC04g008590.2J	BolC01g000190.2J	BolC04g033800.2J	BolC03g034400.2J	BolC09g006190.2J
1570	BolC03g086420.2J	BolC09g026400.2J	BolC07g046760.2J	BolC05g000970.2J	BolC04g008720.2J	BolC09g017830.2J
1571	BolC09g035010.2J	BolC07g047560.2J	BolC05g023620.2J	BolC03g053360.2J	BolC08g057290.2J	BolC09g043140.2J
1572	BolC05g040770.2J	BolC05g002870.2J	BolC05g057740.2J	BolC03g040420.2J	BolC02g003370.2J	BolC04g006490.2J
1573	BolC04g022660.2J	BolC09g045580.2J	BolC07g043380.2J	BolC04g017130.2J	BolC01g021850.2J	BolC08g032430.2J
1574	BolC02g059710.2J	BolC03g083040.2J	BolC03g071060.2J	BolC08g025240.2J	BolC07g031650.2J	BolC07g043460.2J
1575	BolC05g042120.2J	BolC01g010280.2J	BolC02g058910.2J	BolC06g009100.2J	BolC05g050090.2J	BolC07g056440.2J
1576	BolC09g062320.2J	BolC09g017940.2J	BolC05g027100.2J	BolC07g003320.2J	BolC06g023430.2J	BolC05g051670.2J
1577	BolC05g052810.2J	BolCnng002900.2J	BolC02g023590.2J	BolC05g029390.2J	BolC07g049690.2J	BolC02g017790.2J
1578	BolC02g042170.2J	BolC02g054020.2J	BolC04g005400.2J	BolC06g021820.2J	BolC03g086260.2J	BolC02g060440.2J
1579	BolC08g056880.2J	BolC06g004240.2J	BolC04g051720.2J	BolC05g058790.2J	BolCnng003180.2J	BolC07g052410.2J
1580	BolC07g049250.2J	BolC06g046410.2J	BolC01g005590.2J	BolC09g001110.2J	BolC07g052810.2J	BolC02g045270.2J
1581	BolC09g058230.2J	BolC07g036930.2J	BolC01g031440.2J	BolC03g059600.2J	BolC01g010130.2J	BolC01g044780.2J
1582	BolC09g058200.2J	BolC05g001840.2J	BolC03g039780.2J	BolC09g017220.2J	BolC03g021110.2J	BolC04g065550.2J
1583	BolC04g003200.2J	BolC01g054710.2J	BolC08g059830.2J	BolC07g017320.2J	BolC02g010050.2J	BolC05g004620.2J
1584	BolC03g074010.2J	BolC05g035170.2J	BolC02g059570.2J	BolC01g023100.2J	BolC03g010420.2J	BolC05g007460.2J
1585	BolC08g000990.2J	BolC09g024360.2J	BolC07g045500.2J	BolC04g062950.2J	BolC06g030960.2J	BolC08g032760.2J
1586	BolC08g005300.2J	BolC08g031390.2J	BolC06g002920.2J	BolC01g009970.2J	BolC09g004840.2J	BolC01g005570.2J
1587	BolC03g003060.2J	BolC05g046780.2J	BolC09g006190.2J	BolC05g050710.2J	BolC07g041100.2J	BolC09g003400.2J
1588	BolC05g014810.2J	BolC04g065550.2J	BolC08g025890.2J	BolC03g084970.2J	BolC07g023310.2J	BolC08g025390.2J
1589	BolC03g024620.2J	BolC03g040290.2J	BolC07g023390.2J	BolC03g064570.2J	BolC02g032060.2J	BolC09g045080.2J
1590	BolC08g045590.2J	BolC01g015450.2J	BolC08g003480.2J	BolC06g006470.2J	BolC02g054270.2J	BolC05g000600.2J
1591	BolC04g004550.2J	BolC03g013710.2J	BolC08g033060.2J	BolC03g081590.2J	BolC04g045660.2J	BolC03g022700.2J
1592	BolC03g060100.2J	BolC06g015890.2J	BolC07g043000.2J	BolC08g024750.2J	BolC09g053850.2J	BolC04g029820.2J
1593	BolC05g041090.2J	BolC01g056270.2J	BolC01g024110.2J	BolC07g006440.2J	BolC03g040310.2J	BolC03g028800.2J
1594	BolC01g027420.2J	BolC07g052610.2J	BolC01g047870.2J	BolC08g011060.2J	BolC06g046130.2J	BolC05g034660.2J
1595	BolC05g049930.2J	BolC05g022710.2J	BolC08g022650.2J	BolC09g030920.2J	BolC07g038240.2J	BolC05g000050.2J
1596	BolC07g037910.2J	BolC02g011610.2J	BolC06g041540.2J	BolC08g060170.2J	BolC07g044710.2J	BolC03g075940.2J
1597	BolC09g068350.2J	BolC05g045770.2J	BolC01g051470.2J	BolC06g014530.2J	BolC04g014800.2J	BolC08g025370.2J
1598	BolC05g011610.2J	BolCnng002440.2J	BolC06g022510.2J	BolC05g006510.2J	BolC06g036710.2J	BolC03g059830.2J
1599	BolC03g078690.2J	BolCnng002890.2J	BolC09g064630.2J	BolC09g029370.2J	BolC09g005290.2J	BolC04g012400.2J
1600	BolC06g009150.2J	BolCnng003460.2J	BolC06g037610.2J	BolC02g013380.2J	BolC02g038270.2J	BolC08g055980.2J
1601	BolC03g014100.2J	BolCnng004270.2J	BolC07g042160.2J	BolC08g019560.2J	BolC03g080870.2J	BolC05g016020.2J
1602	BolC06g019390.2J	BolC09g051910.2J	BolC07g021660.2J	BolC02g053610.2J	BolC08g049050.2J	BolC03g026790.2J
1603	BolC05g054590.2J	BolC05g001440.2J	BolC09g029060.2J	BolC08g017630.2J	BolC05g012300.2J	BolC04g054310.2J
1604	BolC04g067070.2J	BolC03g007730.2J	BolC01g005360.2J	BolC04g004970.2J	BolC05g025950.2J	BolC01g034910.2J
1605	BolC03g052450.2J	BolC07g037160.2J	BolC01g027400.2J	BolC01g002660.2J	BolC05g062150.2J	BolC05g008820.2J
1606	BolC02g005500.2J	BolCnng004610.2J	BolC08g026230.2J	BolC06g000270.2J	BolC05g011990.2J	BolC02g046980.2J
1607	BolC07g020650.2J	BolC02g017160.2J	BolC04g055080.2J	BolC09g023170.2J	BolC06g003820.2J	BolC08g033120.2J
1608	BolC07g030250.2J	BolC02g013850.2J	BolC03g071770.2J	BolC01g001380.2J	BolC09g051630.2J	BolC09g002610.2J
1609	BolC02g022470.2J	BolC04g037720.2J	BolC03g003230.2J	BolC02g020410.2J	BolC03g000310.2J	BolC01g030710.2J
1610	BolC03g037960.2J	BolC05g005140.2J	BolC05g025450.2J	BolC08g024480.2J	BolC07g052450.2J	BolC08g018660.2J
1611	BolC07g054380.2J	BolC03g048150.2J	BolC04g010830.2J	BolC06g029670.2J	BolC04g030540.2J	BolC01g022290.2J
1612	BolC01g001780.2J	BolC05g006730.2J	BolC02g013090.2J	BolC08g042950.2J	BolC06g004150.2J	BolC04g047760.2J
1613	BolC07g057580.2J	BolC08g003720.2J	BolC09g022370.2J	BolC09g011480.2J	BolC08g060180.2J	BolC04g020940.2J
1614	BolC02g004510.2J	BolC03g048820.2J	BolC04g019090.2J	BolC02g024750.2J	BolC09g052200.2J	BolC05g000790.2J
1615	BolC04g007240.2J	BolC03g034930.2J	BolC05g039090.2J	BolC02g014630.2J	BolC07g029100.2J	BolC06g015150.2J
1616	BolC05g054390.2J	BolC01g001790.2J	BolC05g057460.2J	BolC03g074280.2J	BolC01g001520.2J	BolC09g049140.2J
1617	BolC01g035010.2J	BolC03g085200.2J	BolC07g054600.2J	BolC07g046650.2J	BolC09g042840.2J	BolC03g043820.2J
1618	BolC07g013360.2J	BolC08g037920.2J	BolC02g005440.2J	BolC07g055920.2J	BolC07g022190.2J	BolC08g032500.2J
1619	BolC06g025480.2J	BolC09g004380.2J	BolC07g051620.2J	BolC04g064930.2J	BolC09g032160.2J	BolC03g010980.2J
1620	BolC06g028490.2J	BolC02g015480.2J	BolC08g007350.2J	BolC08g028650.2J	BolC03g019480.2J	BolC06g047770.2J
1621	BolC03g057890.2J	BolC03g041920.2J	BolC05g011490.2J	BolC01g032460.2J	BolC04g056260.2J	BolC05g027430.2J
1622	BolC03g075160.2J	BolC04g015460.2J	BolC05g035280.2J	BolC01g003340.2J	BolC05g060880.2J	BolC08g048130.2J
1623	BolC06g004910.2J	BolC06g034460.2J	BolC07g037490.2J	BolC05g049570.2J	BolC07g013010.2J	BolC07g039770.2J
1624	BolC08g049780.2J	BolC09g020270.2J	BolC03g057330.2J	BolC04g029390.2J	BolC01g030530.2J	BolC04g057910.2J
1625	BolC03g029270.2J	BolC06g022910.2J	BolC02g028890.2J	BolC05g038490.2J	BolC08g035100.2J	BolC03g021350.2J
1626	BolC03g029280.2J	BolC05g051490.2J	BolC06g020320.2J	BolC04g002450.2J	BolC06g049800.2J	BolC08g027090.2J
1627	BolC04g020020.2J	BolC02g063580.2J	BolC05g007190.2J	BolC05g001010.2J	BolC06g026720.2J	BolC05g011100.2J
1628	BolC06g008620.2J	BolC08g031100.2J	BolC03g056740.2J	BolC01g050020.2J	BolC01g008360.2J	BolC06g026360.2J
1629	BolC02g048330.2J	BolC03g067130.2J	BolC09g030750.2J	BolC04g001150.2J	BolC04g053420.2J	BolC06g022510.2J
1630	BolC08g056910.2J	BolC09g035500.2J	BolC06g011700.2J	BolC01g007810.2J	BolC02g025770.2J	BolC05g055140.2J
1631	BolC06g000430.2J	BolC05g057320.2J	BolC01g016360.2J	BolC07g059730.2J	BolC05g020380.2J	BolC07g038980.2J
1632	BolC07g009970.2J	BolC07g045750.2J	BolC01g023200.2J	BolC08g000250.2J	BolC04g020650.2J	BolC03g003680.2J
1633	BolC07g011280.2J	BolC07g052410.2J	BolC07g059500.2J	BolC02g010330.2J	BolC03g006580.2J	BolC09g002450.2J
1634	BolC03g044000.2J	BolC06g050620.2J	BolC03g004630.2J	BolC09g030990.2J	BolC07g046630.2J	BolC05g061600.2J
1635	BolC03g019480.2J	BolC09g065380.2J	BolC04g051220.2J	BolC03g061820.2J	BolC09g041400.2J	BolC08g043220.2J
1636	BolC03g036530.2J	BolC03g007890.2J	BolC01g043080.2J	BolC01g041330.2J	BolC07g043510.2J	BolC06g035580.2J
1637	BolC06g021730.2J	BolC05g007710.2J	BolC06g048170.2J	BolC04g047600.2J	BolC07g043260.2J	BolC04g007050.2J
1638	BolC07g034680.2J	BolC01g051940.2J	BolC07g051240.2J	BolC02g034800.2J	BolC07g041310.2J	BolC04g030560.2J
1639	BolC09g033630.2J	BolC03g011650.2J	BolC03g033840.2J	BolC04g041110.2J	BolC03g035440.2J	BolC07g032100.2J
1640	BolC02g044460.2J	BolC05g038380.2J	BolC03g027330.2J	BolC07g037020.2J	BolC08g043060.2J	BolC08g017460.2J
1641	BolC07g050130.2J	BolC08g032440.2J	BolC09g019480.2J	BolC01g004850.2J	BolC01g003660.2J	BolC08g050490.2J
1642	BolC02g040250.2J	BolC09g057480.2J	BolC07g038290.2J	BolC08g058520.2J	BolC07g008670.2J	BolC07g042190.2J
1643	BolC05g037870.2J	BolC01g031100.2J	BolC07g023350.2J	BolC07g014440.2J	BolC03g083260.2J	BolC05g048240.2J
1644	BolC02g035260.2J	BolC03g048320.2J	BolC05g002140.2J	BolC04g008950.2J	BolC03g025280.2J	BolC03g032820.2J
1645	BolC07g015050.2J	BolC04g051680.2J	BolC06g024530.2J	BolC05g004220.2J	BolC07g044320.2J	BolC02g058700.2J
1646	BolC04g060970.2J	BolC06g037070.2J	BolC06g019390.2J	BolC01g049030.2J	BolC05g052870.2J	BolC07g029140.2J
1647	BolC07g038290.2J	BolC09g050270.2J	BolC04g050830.2J	BolC05g012000.2J	BolC01g030180.2J	BolC07g047800.2J
1648	BolC02g039760.2J	BolC03g040390.2J	BolC07g020700.2J	BolCnng002920.2J	BolC06g051030.2J	BolC06g016820.2J
1649	BolC03g020960.2J	BolC06g050380.2J	BolC06g032950.2J	BolC05g042440.2J	BolC01g057610.2J	BolC03g006730.2J
1650	BolC01g015020.2J	BolC07g023780.2J	BolC09g032570.2J	BolC05g041570.2J	BolC06g001440.2J	BolC06g036460.2J
1651	BolC04g031560.2J	BolC05g014440.2J	BolC09g032480.2J	BolC02g003130.2J	BolC09g053880.2J	BolC01g005200.2J
1652	BolC09g053780.2J	BolC09g005830.2J	BolC04g015730.2J	BolC01g053170.2J	BolC01g017850.2J	BolC06g041170.2J
1653	BolC06g031050.2J	BolC01g020080.2J	BolC09g060220.2J	BolC06g003740.2J	BolC08g025020.2J	BolC02g002880.2J
1654	BolC06g031370.2J	BolC01g024490.2J	BolC09g062520.2J	BolC04g060440.2J	BolC08g020330.2J	BolC07g019710.2J
1655	BolC02g006830.2J	BolC07g027050.2J	BolC04g005110.2J	BolC09g039490.2J	BolC02g027190.2J	BolC07g045190.2J
1656	BolC06g044860.2J	BolC01g023350.2J	BolC04g005180.2J	BolC08g001590.2J	BolC05g003290.2J	BolC04g054270.2J
1657	BolC09g026510.2J	BolC02g001640.2J	BolC03g009320.2J	BolC02g008550.2J	BolC04g031930.2J	BolC07g041640.2J
1658	BolC07g042090.2J	BolC06g016900.2J	BolC05g014300.2J	BolC09g015560.2J	BolC09g050540.2J	BolC03g035170.2J
1659	BolC07g041100.2J	BolC03g027600.2J	BolC03g033830.2J	BolC03g034570.2J	BolC05g056820.2J	BolC01g003030.2J
1660	BolC03g021510.2J	BolC09g032860.2J	BolC09g010670.2J	BolC01g031750.2J	BolC05g009180.2J	BolC05g007020.2J
1661	BolC05g006650.2J	BolC02g006000.2J	BolC09g065440.2J	BolC03g086320.2J	BolC06g013890.2J	BolC01g022910.2J
1662	BolC07g036450.2J	BolC09g035610.2J	BolC01g002640.2J	BolCnng002910.2J	BolC07g035410.2J	BolC01g025990.2J
1663	BolC03g006680.2J	BolC08g056370.2J	BolC09g038220.2J	BolC08g041450.2J	BolC09g032700.2J	BolC07g046960.2J
1664	BolC07g044710.2J	BolC08g036980.2J	BolC04g004950.2J	BolC03g034180.2J	BolC09g042970.2J	BolC08g039860.2J
1665	BolC01g029270.2J	BolC03g047530.2J	BolC01g010970.2J	BolC07g009340.2J	BolC09g049990.2J	BolC04g032090.2J
1666	BolC02g017630.2J	BolC05g053950.2J	BolC02g039030.2J	BolC03g032410.2J	BolC09g025060.2J	BolC08g036800.2J
1667	BolC02g044340.2J	BolC07g048710.2J	BolC07g023780.2J	BolCnng002420.2J	BolC08g029850.2J	BolC03g066750.2J
1668	BolC03g082550.2J	BolC04g065100.2J	BolC08g044850.2J	BolC06g039250.2J	BolC09g026300.2J	BolC06g049900.2J
1669	BolC07g053810.2J	BolC05g055820.2J	BolC06g038830.2J	BolC03g042030.2J	BolC02g034400.2J	BolC01g005660.2J
1670	BolC07g024000.2J	BolC08g033070.2J	BolC09g001190.2J	BolC07g058880.2J	BolC02g058430.2J	BolC03g030250.2J
1671	BolC04g039900.2J	BolC06g001010.2J	BolC04g054730.2J	BolC07g039300.2J	BolC04g063940.2J	BolC01g050660.2J
1672	BolC03g006590.2J	BolC06g043620.2J	BolC02g017720.2J	BolC08g050960.2J	BolC09g046180.2J	BolC04g010750.2J
1673	BolC05g010530.2J	BolC02g045270.2J	BolC05g044690.2J	BolC03g075550.2J	BolC08g029930.2J	BolC06g015070.2J
1674	BolC07g026120.2J	BolCnng003270.2J	BolC09g061900.2J	BolC05g022430.2J	BolC05g003090.2J	BolC01g006740.2J
1675	BolC01g020970.2J	BolC08g041750.2J	BolC07g006740.2J	BolC05g010210.2J	BolC09g056450.2J	BolC02g040740.2J
1676	BolC03g001790.2J	BolC09g007290.2J	BolC05g028710.2J	BolC06g037440.2J	BolC04g011090.2J	BolC05g057460.2J
1677	BolC08g031630.2J	BolC05g049240.2J	BolC01g040420.2J	BolC08g042010.2J	BolC01g001780.2J	BolC05g042470.2J
1678	BolC07g033600.2J	BolC08g002370.2J	BolC03g002680.2J	BolC02g027330.2J	BolC01g047560.2J	BolC04g047660.2J
1679	BolC05g000500.2J	BolC09g042420.2J	BolC06g035610.2J	BolC08g043740.2J	BolC03g057890.2J	BolC07g050660.2J
1680	BolC01g029440.2J	BolC06g016920.2J	BolC07g044640.2J	BolC03g048690.2J	BolC09g066840.2J	BolC01g036140.2J
1681	BolC01g051430.2J	BolC05g023590.2J	BolC02g058040.2J	BolC04g043550.2J	BolC05g017710.2J	BolC03g063880.2J
1682	BolC03g003040.2J	BolC08g003320.2J	BolC07g051880.2J	BolC08g028230.2J	BolC05g049690.2J	BolC09g030390.2J
1683	BolC05g034700.2J	BolC04g007770.2J	BolC01g015420.2J	BolC05g025530.2J	BolC08g051940.2J	BolC03g021550.2J
1684	BolC04g056860.2J	BolC03g040690.2J	BolC07g027880.2J	BolC01g020470.2J	BolC09g011890.2J	BolC03g025240.2J
1685	BolC09g039280.2J	BolC02g028830.2J	BolC04g028310.2J	BolC03g006520.2J	BolC08g043260.2J	BolC06g019210.2J
1686	BolC04g030320.2J	BolC08g027470.2J	BolC04g038220.2J	BolC01g020880.2J	BolC07g055020.2J	BolC06g046260.2J
1687	BolC03g027310.2J	BolC03g008590.2J	BolC04g011820.2J	BolC02g037750.2J	BolC03g008630.2J	BolC09g004530.2J
1688	BolC08g006830.2J	BolC04g068260.2J	BolC09g069710.2J	BolC09g016480.2J	BolC03g054390.2J	BolC09g039160.2J
1689	BolC05g053050.2J	BolC09g016250.2J	BolC06g043720.2J	BolC03g028240.2J	BolC04g034610.2J	BolC03g008870.2J
1690	BolC05g056050.2J	BolC06g038900.2J	BolC07g000670.2J	BolC02g024930.2J	BolC09g019770.2J	BolC08g014980.2J
1691	BolC09g025070.2J	BolC02g013350.2J	BolC07g055100.2J	BolC04g058350.2J	BolC03g084760.2J	BolC06g050360.2J
1692	BolC02g062140.2J	BolC02g027230.2J	BolC08g026780.2J	BolC07g000950.2J	BolC09g001620.2J	BolC08g055130.2J
1693	BolC07g043680.2J	BolC09g003350.2J	BolC08g040960.2J	BolC01g037030.2J	BolC05g012970.2J	BolC03g014490.2J
1694	BolC06g027670.2J	BolC04g006160.2J	BolC07g044280.2J	BolC03g021470.2J	BolC03g014380.2J	BolC03g011590.2J
1695	BolC07g026580.2J	BolC07g034690.2J	BolC07g051190.2J	BolC08g048230.2J	BolC07g051300.2J	BolC04g039510.2J
1696	BolC09g056470.2J	BolC07g047040.2J	BolC03g050440.2J	BolC06g007790.2J	BolC03g010180.2J	BolC07g054320.2J
1697	BolC07g059370.2J	BolC01g050390.2J	BolC03g060800.2J	BolC01g017780.2J	BolC08g048460.2J	BolC02g002000.2J
1698	BolC02g027090.2J	BolC04g037810.2J	BolC06g033950.2J	BolC07g023790.2J	BolC09g067890.2J	BolC06g036940.2J
1699	BolC03g034800.2J	BolC06g011620.2J	BolC03g017760.2J	BolC07g000460.2J	BolC08g049960.2J	BolC01g056700.2J
1700	BolC01g015470.2J	BolC09g026590.2J	BolC04g061000.2J	BolC03g085720.2J	BolC04g025760.2J	BolC02g040430.2J
1701	BolC02g044860.2J	BolC07g014870.2J	BolC08g049710.2J	BolC04g014020.2J	BolC05g019250.2J	BolC09g005400.2J
1702	BolC03g080160.2J	BolC08g054380.2J	BolC04g064540.2J	BolC03g030760.2J	BolC08g060270.2J	BolC05g045110.2J
1703	BolC06g040970.2J	BolC08g038380.2J	BolC08g022970.2J	BolC02g038180.2J	BolC07g030380.2J	BolC09g034700.2J
1704	BolC04g055620.2J	BolC05g003350.2J	BolC03g036350.2J	BolC03g029810.2J	BolC07g041910.2J	BolC01g052840.2J
1705	BolC03g055130.2J	BolC03g020330.2J	BolC09g055460.2J	BolC01g003350.2J	BolC05g004080.2J	BolC06g037180.2J
1706	BolC09g066430.2J	BolC03g041000.2J	BolC02g029890.2J	BolC03g078580.2J	BolC02g053230.2J	BolC08g002820.2J
1707	BolC09g019120.2J	BolC05g060810.2J	BolC01g034380.2J	BolC03g011390.2J	BolC01g019130.2J	BolC09g035350.2J
1708	BolC01g009900.2J	BolC01g040330.2J	BolC04g063120.2J	BolC04g051250.2J	BolC04g053320.2J	BolC01g050130.2J
1709	BolC01g022880.2J	BolC06g050830.2J	BolC03g083780.2J	BolC09g015570.2J	BolC01g038830.2J	BolC04g050590.2J
1710	BolC04g060990.2J	BolC01g041560.2J	BolC09g042880.2J	BolC07g027560.2J	BolC05g049440.2J	BolC05g018450.2J
1711	BolC03g017870.2J	BolC04g002820.2J	BolC03g080830.2J	BolC02g005040.2J	BolC08g060010.2J	BolC05g022000.2J
1712	BolC02g012080.2J	BolC03g015430.2J	BolC07g006890.2J	BolC04g006230.2J	BolC03g031980.2J	BolC07g000610.2J
1713	BolC04g000700.2J	BolC08g037840.2J	BolC07g013670.2J	BolC06g026290.2J	BolC09g053780.2J	BolC05g010630.2J
1714	BolC03g010280.2J	BolC03g041750.2J	BolC04g055280.2J	BolC07g021160.2J	BolC09g018230.2J	BolC04g040720.2J
1715	BolC03g056790.2J	BolC07g056170.2J	BolC02g051140.2J	BolC03g047310.2J	BolC04g040380.2J	BolC02g010730.2J
1716	BolC07g034990.2J	BolC07g012510.2J	BolC03g016670.2J	BolC08g030540.2J	BolC09g056260.2J	BolC08g040160.2J
1717	BolC02g022150.2J	BolC01g015190.2J	BolC07g035260.2J	BolC07g017850.2J	BolC07g058260.2J	BolC06g048290.2J
1718	BolC07g023310.2J	BolC02g049890.2J	BolC08g002860.2J	BolC07g040170.2J	BolC09g048160.2J	BolC01g004250.2J
1719	BolC05g062060.2J	BolC03g016690.2J	BolC04g020280.2J	BolC09g058460.2J	BolC01g006450.2J	BolC09g004910.2J
1720	BolC03g020300.2J	BolC07g020700.2J	BolC06g038910.2J	BolC09g052110.2J	BolC08g052320.2J	BolC01g015450.2J
1721	BolC01g016750.2J	BolC06g041310.2J	BolC09g063480.2J	BolC02g017670.2J	BolC06g045100.2J	BolC03g082320.2J
1722	BolC09g003140.2J	BolC08g040530.2J	BolC08g051600.2J	BolC04g051630.2J	BolC03g042950.2J	BolC08g034320.2J
1723	BolC03g075910.2J	BolC05g004610.2J	BolC09g041550.2J	BolC03g013380.2J	BolC01g023230.2J	BolC06g018380.2J
1724	BolC05g055050.2J	BolC09g039160.2J	BolC08g046070.2J	BolC08g055550.2J	BolC01g005620.2J	BolC08g037560.2J
1725	BolC06g039810.2J	BolCnng001100.2J	BolC09g008180.2J	BolC08g004530.2J	BolC03g070520.2J	BolC04g058020.2J
1726	BolC04g014980.2J	BolC01g038940.2J	BolC09g015440.2J	BolC05g011880.2J	BolC05g045100.2J	BolC02g041160.2J
1727	BolC08g040300.2J	BolC08g045880.2J	BolC07g042130.2J	BolC01g041190.2J	BolC01g051860.2J	BolC07g042880.2J
1728	BolC01g040010.2J	BolC02g009850.2J	BolC04g036850.2J	BolC09g030600.2J	BolC04g039060.2J	BolC03g003810.2J
1729	BolC02g056490.2J	BolC09g008890.2J	BolC09g021160.2J	BolC02g011180.2J	BolC03g014800.2J	BolC04g053830.2J
1730	BolC06g046950.2J	BolC04g022480.2J	BolC01g006350.2J	BolC09g052820.2J	BolC02g027090.2J	BolC03g025190.2J
1731	BolC03g055040.2J	BolC02g020630.2J	BolC08g028390.2J	BolC05g037490.2J	BolC06g009030.2J	BolC03g036670.2J
1732	BolC03g084760.2J	BolC02g026590.2J	BolC09g058230.2J	BolC01g016650.2J	BolC08g039880.2J	BolC06g028180.2J
1733	BolC04g030240.2J	BolC01g032470.2J	BolC09g058200.2J	BolC08g054630.2J	BolC04g067730.2J	BolC05g035600.2J
1734	BolC03g058300.2J	BolC09g066690.2J	BolC08g041010.2J	BolC05g040970.2J	BolC07g021990.2J	BolC09g019480.2J
1735	BolC04g022350.2J	BolC07g024560.2J	BolC09g004800.2J	BolC03g026840.2J	BolC08g049400.2J	BolC03g028040.2J
1736	BolC02g054210.2J	BolC03g050270.2J	BolC01g052490.2J	BolC09g028570.2J	BolC07g025150.2J	BolC01g057180.2J
1737	BolC02g041240.2J	BolC05g000340.2J	BolC09g002160.2J	BolC02g017270.2J	BolC01g057360.2J	BolC04g065410.2J
1738	BolC08g011780.2J	BolC02g013860.2J	BolC09g051040.2J	BolC03g061250.2J	BolC07g030160.2J	BolC04g003490.2J
1739	BolC06g050980.2J	BolC06g050760.2J	BolC08g047810.2J	BolC08g018880.2J	BolC05g010700.2J	BolC04g009330.2J
1740	BolC09g036830.2J	BolC03g078590.2J	BolC02g046190.2J	BolC03g024070.2J	BolC05g050490.2J	BolC04g008510.2J
1741	BolC01g046660.2J	BolC09g064000.2J	BolC06g010230.2J	BolC03g036390.2J	BolC08g016320.2J	BolC08g001310.2J
1742	BolC04g004910.2J	BolC09g010420.2J	BolC08g015100.2J	BolC01g013110.2J	BolC09g023890.2J	BolC06g032800.2J
1743	BolC04g008720.2J	BolC05g043430.2J	BolC07g030450.2J	BolC08g026650.2J	BolC09g061950.2J	BolC08g053780.2J
1744	BolC03g049410.2J	BolC05g063390.2J	BolC02g005900.2J	BolC03g027090.2J	BolC05g012430.2J	BolC01g021970.2J
1745	BolC07g042670.2J	BolC04g046050.2J	BolC04g066950.2J	BolC01g042490.2J	BolC08g010660.2J	BolC01g003090.2J
1746	BolC03g069150.2J	BolC04g051810.2J	BolC04g062550.2J	BolC07g044770.2J	BolC06g012950.2J	BolC03g042960.2J
1747	BolC01g016390.2J	BolC05g023470.2J	BolC02g007960.2J	BolC09g059990.2J	BolC03g086590.2J	BolC01g013040.2J
1748	BolC05g004130.2J	BolC08g032550.2J	BolC07g057850.2J	BolC02g008430.2J	BolC07g045780.2J	BolC02g008290.2J
1749	BolC05g060460.2J	BolC07g048880.2J	BolC09g015400.2J	BolC05g013610.2J	BolC01g025240.2J	BolC08g018620.2J
1750	BolC06g014310.2J	BolC04g049020.2J	BolC09g004780.2J	BolC09g059380.2J	BolC09g020870.2J	BolC09g014880.2J
1751	BolC04g061260.2J	BolC02g011580.2J	BolC08g047160.2J	BolC05g012700.2J	BolC09g005450.2J	BolC04g037810.2J
1752	BolC09g011890.2J	BolC04g001990.2J	BolC01g001580.2J	BolC05g048370.2J	BolC07g034330.2J	BolC02g021370.2J
1753	BolC07g022190.2J	BolC09g030170.2J	BolC06g008090.2J	BolC02g014610.2J	BolC05g043540.2J	BolC04g041440.2J
1754	BolC08g050700.2J	BolC03g041900.2J	BolC02g022980.2J	BolC03g041500.2J	BolC08g043450.2J	BolC05g015960.2J
1755	BolC09g066210.2J	BolC04g002410.2J	BolC03g050730.2J	BolC05g023470.2J	BolC09g031410.2J	BolC01g020210.2J
1756	BolC05g015530.2J	BolC08g032400.2J	BolC07g042370.2J	BolC01g048930.2J	BolC09g051860.2J	BolC07g019600.2J
1757	BolC03g071960.2J	BolC08g050150.2J	BolC07g001740.2J	BolC04g037730.2J	BolC01g005180.2J	BolC03g015230.2J
1758	BolC05g055130.2J	BolC09g011350.2J	BolC04g037830.2J	BolC05g006010.2J	BolC04g037790.2J	BolC05g025420.2J
1759	BolC07g053180.2J	BolC03g026810.2J	BolC01g039880.2J	BolC02g015310.2J	BolC07g044720.2J	BolC04g019210.2J
1760	BolC02g056580.2J	BolC07g017940.2J	BolC04g044420.2J	BolC09g028600.2J	BolC04g059230.2J	BolC09g009910.2J
1761	BolC03g059540.2J	BolC09g056590.2J	BolC09g037760.2J	BolC02g057320.2J	BolC03g070660.2J	BolC01g043200.2J
1762	BolC04g059860.2J	BolC01g030800.2J	BolC03g042790.2J	BolC09g005830.2J	BolC09g014910.2J	BolC03g080820.2J
1763	BolC02g013110.2J	BolC09g013830.2J	BolC04g040690.2J	BolC09g016020.2J	BolC07g033850.2J	BolC04g015790.2J
1764	BolC04g021030.2J	BolC03g013020.2J	BolC03g052450.2J	BolC05g007840.2J	BolC01g042280.2J	BolC03g032140.2J
1765	BolC03g048520.2J	BolC08g029120.2J	BolC05g019610.2J	BolC01g021700.2J	BolC06g018600.2J	BolC08g045200.2J
1766	BolC03g021670.2J	BolC03g017690.2J	BolC01g048120.2J	BolC04g058280.2J	BolC03g035340.2J	BolC08g050850.2J
1767	BolC04g015570.2J	BolC04g020120.2J	BolC05g009170.2J	BolC07g018850.2J	BolC06g007670.2J	BolC04g001940.2J
1768	BolC08g050250.2J	BolC07g031220.2J	BolC06g041790.2J	BolC08g023720.2J	BolC09g027500.2J	BolC03g062490.2J
1769	BolC03g072130.2J	BolC03g025560.2J	BolC06g029120.2J	BolC03g056540.2J	BolC04g004820.2J	BolC01g023770.2J
1770	BolC02g000450.2J	BolCnng004920.2J	BolC03g060930.2J	BolC03g069630.2J	BolC07g018300.2J	BolC03g001760.2J
1771	BolC08g027760.2J	BolC08g000270.2J	BolC09g001820.2J	BolC02g009950.2J	BolC07g011280.2J	BolC03g066560.2J
1772	BolC02g005890.2J	BolC09g001030.2J	BolC04g044080.2J	BolC04g044250.2J	BolC09g060400.2J	BolC08g054070.2J
1773	BolC09g027820.2J	BolC01g007310.2J	BolC04g011870.2J	BolC02g052550.2J	BolC05g055050.2J	BolC05g009940.2J
1774	BolC09g024460.2J	BolC03g050930.2J	BolC04g014940.2J	BolC01g009710.2J	BolC05g051070.2J	BolC04g035090.2J
1775	BolC05g011020.2J	BolC08g002380.2J	BolC01g011890.2J	BolC08g044670.2J	BolC09g023820.2J	BolC07g056830.2J
1776	BolC07g051600.2J	BolC09g059230.2J	BolC08g036310.2J	BolC08g003310.2J	BolC03g069070.2J	BolC01g044590.2J
1777	BolC05g044400.2J	BolC07g012930.2J	BolC07g023150.2J	BolC04g002010.2J	BolC04g050760.2J	BolC02g049020.2J
1778	BolC03g044120.2J	BolC06g000140.2J	BolC09g055750.2J	BolC07g035910.2J	BolC05g049770.2J	BolC07g054270.2J
1779	BolC08g049540.2J	BolC08g037560.2J	BolC03g026700.2J	BolC02g020960.2J	BolC01g037720.2J	BolC03g047110.2J
1780	BolC03g005260.2J	BolCnng000900.2J	BolC03g017270.2J	BolC02g008680.2J	BolC04g063670.2J	BolC03g086610.2J
1781	BolC07g011900.2J	BolC05g016190.2J	BolC07g042420.2J	BolC01g044900.2J	BolC09g039280.2J	BolC07g036490.2J
1782	BolC07g036310.2J	BolC06g000740.2J	BolC08g013940.2J	BolC08g056020.2J	BolC04g050300.2J	BolC02g014690.2J
1783	BolC09g055600.2J	BolC03g003880.2J	BolC04g037680.2J	BolC06g029680.2J	BolC05g057270.2J	BolC08g026070.2J
1784	BolC02g033060.2J	BolC03g050510.2J	BolC04g065410.2J	BolC03g031250.2J	BolC09g020840.2J	BolC08g044020.2J
1785	BolC07g038000.2J	BolC09g010950.2J	BolC04g061090.2J	BolC04g037910.2J	BolC03g058570.2J	BolC03g032780.2J
1786	BolC02g061790.2J	BolC03g018020.2J	BolC08g005060.2J	BolC08g001940.2J	BolC02g054830.2J	BolC07g046190.2J
1787	BolC07g040600.2J	BolC05g041810.2J	BolC06g006300.2J	BolC08g018970.2J	BolC08g041180.2J	BolC08g049690.2J
1788	BolC04g014420.2J	BolC06g045840.2J	BolC09g043050.2J	BolC06g048790.2J	BolC05g062650.2J	BolC08g037830.2J
1789	BolC04g001020.2J	BolC06g003410.2J	BolC07g051060.2J	BolC05g011960.2J	BolC06g021510.2J	BolC05g026580.2J
1790	BolC02g000210.2J	BolC03g010920.2J	BolC04g038020.2J	BolC09g045730.2J	BolC03g023640.2J	BolC05g057720.2J
1791	BolC03g033720.2J	BolC07g049420.2J	BolC09g037980.2J	BolC08g052860.2J	BolC02g032440.2J	BolC06g051100.2J
1792	BolC02g058060.2J	BolC04g061480.2J	BolC03g078560.2J	BolC03g080400.2J	BolC03g050310.2J	BolC02g024130.2J
1793	BolC02g058030.2J	BolC01g009010.2J	BolC07g005340.2J	BolC02g011720.2J	BolC02g007110.2J	BolC01g008210.2J
1794	BolC02g057940.2J	BolC06g038820.2J	BolC07g026780.2J	BolC08g046820.2J	BolC09g045540.2J	BolC03g008170.2J
1795	BolC01g050980.2J	BolC03g011010.2J	BolC04g062560.2J	BolC01g014880.2J	BolC05g063090.2J	BolC05g050150.2J
1796	BolC04g030000.2J	BolC06g049540.2J	BolC04g000450.2J	BolC09g061840.2J	BolC04g054060.2J	BolC09g068810.2J
1797	BolC02g017690.2J	BolC08g024060.2J	BolC02g008190.2J	BolC03g075290.2J	BolC04g029540.2J	BolC07g022650.2J
1798	BolC04g068680.2J	BolC03g078470.2J	BolC08g036350.2J	BolC01g028870.2J	BolC07g053810.2J	BolC02g030700.2J
1799	BolC02g023490.2J	BolC03g029390.2J	BolC02g036130.2J	BolC09g047940.2J	BolC02g040080.2J	BolC03g061010.2J
1800	BolC04g034190.2J	BolC09g034760.2J	BolC09g053810.2J	BolC06g023170.2J	BolC08g047670.2J	BolC09g005510.2J
1801	BolC03g030530.2J	BolC05g007900.2J	BolC07g041200.2J	BolC05g005600.2J	BolC06g024730.2J	BolC03g050930.2J
1802	BolC09g011310.2J	BolC01g027870.2J	BolC01g001190.2J	BolC03g062150.2J	BolC08g042720.2J	BolC08g039930.2J
1803	BolC04g036750.2J	BolC09g030870.2J	BolC03g083660.2J	BolC06g028790.2J	BolC09g062040.2J	BolC07g058720.2J
1804	BolC08g024760.2J	BolC06g019890.2J	BolC09g062540.2J	BolC06g000870.2J	BolC04g022350.2J	BolC08g000960.2J
1805	BolC01g047650.2J	BolC09g065060.2J	BolC09g010250.2J	BolC04g062330.2J	BolC02g017730.2J	BolC07g037360.2J
1806	BolC04g054860.2J	BolC09g040210.2J	BolC08g032810.2J	BolC02g060180.2J	BolC03g006060.2J	BolC07g043250.2J
1807	BolC04g016650.2J	BolCnng001070.2J	BolC04g041900.2J	BolC06g041680.2J	BolC02g059710.2J	BolC02g029820.2J
1808	BolC04g046290.2J	BolC07g029260.2J	BolC08g050930.2J	BolC07g001930.2J	BolC03g035100.2J	BolC08g038380.2J
1809	BolC05g001100.2J	BolC08g025240.2J	BolC07g026680.2J	BolC08g021630.2J	BolC05g009530.2J	BolC08g039670.2J
1810	BolC05g040610.2J	BolC06g047950.2J	BolC04g008270.2J	BolC08g044990.2J	BolC04g014050.2J	BolC08g039370.2J
1811	BolC01g006840.2J	BolC09g006010.2J	BolC08g038680.2J	BolC03g002830.2J	BolC08g056860.2J	BolC03g078880.2J
1812	BolC01g000170.2J	BolC08g055340.2J	BolC05g045930.2J	BolC09g004140.2J	BolC01g006980.2J	BolC09g063090.2J
1813	BolC01g023230.2J	BolC03g048190.2J	BolC09g043990.2J	BolC03g084470.2J	BolC06g049250.2J	BolC01g024490.2J
1814	BolC09g012680.2J	BolC03g026190.2J	BolC09g059510.2J	BolC06g001630.2J	BolC06g041660.2J	BolC07g005710.2J
1815	BolC06g040470.2J	BolC05g047100.2J	BolC02g021600.2J	BolC08g050610.2J	BolC01g032880.2J	BolC06g050240.2J
1816	BolC06g001260.2J	BolCnng003260.2J	BolC03g013740.2J	BolC01g043370.2J	BolC05g012310.2J	BolC07g053790.2J
1817	BolC02g032140.2J	BolC04g001950.2J	BolC09g042820.2J	BolC03g006250.2J	BolC02g010780.2J	BolC08g007110.2J
1818	BolC07g006740.2J	BolC03g078270.2J	BolC05g045830.2J	BolC02g009650.2J	BolC02g035780.2J	BolC09g057010.2J
1819	BolC03g033830.2J	BolC01g056650.2J	BolC03g054390.2J	BolC04g046970.2J	BolC07g031910.2J	BolC02g025890.2J
1820	BolC05g048100.2J	BolC08g025650.2J	BolC07g006470.2J	BolC08g041780.2J	BolC04g050820.2J	BolC09g000810.2J
1821	BolC04g063520.2J	BolC04g047470.2J	BolC03g009570.2J	BolC03g050060.2J	BolC01g003260.2J	BolC01g052760.2J
1822	BolC06g022720.2J	BolC09g006050.2J	BolC02g044290.2J	BolC09g021810.2J	BolC01g008770.2J	BolC09g062340.2J
1823	BolC05g027110.2J	BolC01g000410.2J	BolC02g032940.2J	BolC09g034570.2J	BolC04g039760.2J	BolC04g062470.2J
1824	BolC07g044530.2J	BolC06g045360.2J	BolC08g059630.2J	BolC01g038270.2J	BolC02g052720.2J	BolC09g003380.2J
1825	BolC07g043670.2J	BolCnng003630.2J	BolC09g066980.2J	BolC03g022580.2J	BolC05g010710.2J	BolC03g008580.2J
1826	BolC04g058110.2J	BolC02g039230.2J	BolC05g023180.2J	BolC05g052960.2J	BolC03g044540.2J	BolC02g041590.2J
1827	BolC07g039660.2J	BolC09g038970.2J	BolC02g059730.2J	BolC05g010640.2J	BolC02g059870.2J	BolC05g006410.2J
1828	BolC09g017770.2J	BolCnng003370.2J	BolC08g026890.2J	BolC01g013220.2J	BolC03g027300.2J	BolC01g036200.2J
1829	BolC03g020000.2J	BolCnng002520.2J	BolC03g034970.2J	BolC05g038370.2J	BolC04g036610.2J	BolC04g008850.2J
1830	BolC08g009190.2J	BolCnng004510.2J	BolC05g045600.2J	BolC02g020180.2J	BolC03g057080.2J	BolC06g016940.2J
1831	BolC08g005050.2J	BolC07g048790.2J	BolC03g063850.2J	BolC03g027360.2J	BolC04g064200.2J	BolC01g049750.2J
1832	BolC06g010030.2J	BolC03g078510.2J	BolC05g042120.2J	BolC05g055600.2J	BolC05g022660.2J	BolC06g038870.2J
1833	BolC03g084290.2J	BolC08g030890.2J	BolC01g026350.2J	BolC04g067090.2J	BolC07g005280.2J	BolC05g022050.2J
1834	BolC06g017280.2J	BolC02g001930.2J	BolC04g012120.2J	BolC03g041600.2J	BolC01g025040.2J	BolC06g025120.2J
1835	BolC03g034690.2J	BolCnng003560.2J	BolC07g052880.2J	BolC09g064950.2J	BolC02g054390.2J	BolC03g049290.2J
1836	BolC01g039220.2J	BolCnng004720.2J	BolC07g049250.2J	BolC05g040980.2J	BolC07g032200.2J	BolC06g006430.2J
1837	BolC01g050670.2J	BolC09g030920.2J	BolC09g022440.2J	BolC03g034390.2J	BolC09g020900.2J	BolC06g016310.2J
1838	BolC02g023890.2J	BolC03g049070.2J	BolC03g073810.2J	BolC03g036440.2J	BolC04g037740.2J	BolC03g007030.2J
1839	BolC06g048200.2J	BolC07g026360.2J	BolC05g024800.2J	BolC02g009800.2J	BolC02g031810.2J	BolC02g012160.2J
1840	BolC04g027110.2J	BolC01g034110.2J	BolC03g053720.2J	BolC05g049180.2J	BolC03g057190.2J	BolC08g049330.2J
1841	BolC03g021530.2J	BolC02g011450.2J	BolC08g013380.2J	BolC07g047440.2J	BolC04g015250.2J	BolC04g041920.2J
1842	BolC02g018340.2J	BolC08g058600.2J	BolC06g044180.2J	BolC02g031930.2J	BolC08g016270.2J	BolC05g058590.2J
1843	BolC09g062540.2J	BolC04g045590.2J	BolC05g022130.2J	BolC01g029660.2J	BolC07g032760.2J	BolC07g001030.2J
1844	BolC09g060700.2J	BolC09g022490.2J	BolC02g007620.2J	BolC08g039690.2J	BolC03g005000.2J	BolC03g002680.2J
1845	BolC03g044990.2J	BolC06g021720.2J	BolC03g046730.2J	BolC03g042140.2J	BolC04g041810.2J	BolC07g005520.2J
1846	BolC08g053940.2J	BolC07g024200.2J	BolC04g050400.2J	BolC03g073770.2J	BolC06g038110.2J	BolC08g000920.2J
1847	BolC04g001830.2J	BolC05g061830.2J	BolC03g023230.2J	BolC06g036250.2J	BolC04g029620.2J	BolC02g020150.2J
1848	BolC09g008190.2J	BolC05g006210.2J	BolC04g054260.2J	BolC09g029740.2J	BolC03g007390.2J	BolC08g003200.2J
1849	BolC09g061060.2J	BolC09g007070.2J	BolC01g007130.2J	BolC07g012330.2J	BolC07g032330.2J	BolC03g035290.2J
1850	BolC02g012860.2J	BolC05g010510.2J	BolC08g004240.2J	BolC08g003290.2J	BolC06g029360.2J	BolC05g051320.2J
1851	BolC04g067130.2J	BolC08g038400.2J	BolC01g006190.2J	BolC04g061820.2J	BolC08g040300.2J	BolC02g040980.2J
1852	BolC01g034460.2J	BolC09g003890.2J	BolC03g017180.2J	BolC09g064210.2J	BolC02g059740.2J	BolC08g025140.2J
1853	BolC04g037760.2J	BolC07g026470.2J	BolC06g007720.2J	BolC08g037090.2J	BolC04g063350.2J	BolC04g017790.2J
1854	BolC06g038500.2J	BolC01g005060.2J	BolC09g019880.2J	BolC02g008250.2J	BolC07g026050.2J	BolC09g059440.2J
1855	BolC07g036700.2J	BolC09g041150.2J	BolC01g051170.2J	BolC03g080100.2J	BolC09g030340.2J	BolC04g030410.2J
1856	BolC05g033400.2J	BolC05g037930.2J	BolC08g035600.2J	BolC03g021960.2J	BolC05g048180.2J	BolC03g021600.2J
1857	BolC09g035720.2J	BolC04g041570.2J	BolC01g017870.2J	BolCnng005370.2J	BolC01g032620.2J	BolC05g051240.2J
1858	BolC08g017480.2J	BolC06g037440.2J	BolC02g033490.2J	BolC02g009120.2J	BolC04g018600.2J	BolC04g061020.2J
1859	BolC09g062750.2J	BolC09g007570.2J	BolC04g002060.2J	BolC02g050510.2J	BolC03g009430.2J	BolC08g022420.2J
1860	BolC03g040490.2J	BolC05g000970.2J	BolC03g012730.2J	BolC04g053330.2J	BolC07g060610.2J	BolC03g008470.2J
1861	BolC03g083830.2J	BolC08g031110.2J	BolC05g026420.2J	BolC07g047650.2J	BolC09g068970.2J	BolC09g053720.2J
1862	BolC03g085580.2J	BolC03g046990.2J	BolC04g067140.2J	BolC04g020570.2J	BolC08g053880.2J	BolC08g033090.2J
1863	BolC02g029390.2J	BolC07g049530.2J	BolC06g046410.2J	BolC08g006780.2J	BolC02g033700.2J	BolC05g022130.2J
1864	BolC08g022560.2J	BolC07g020460.2J	BolC03g021600.2J	BolC01g025650.2J	BolC05g007820.2J	BolC04g015810.2J
1865	BolC06g000500.2J	BolC03g057150.2J	BolC03g030160.2J	BolC09g065970.2J	BolC05g019230.2J	BolC08g027510.2J
1866	BolC07g024920.2J	BolC03g082290.2J	BolC09g023040.2J	BolC01g030800.2J	BolC03g040490.2J	BolC08g020850.2J
1867	BolC06g045920.2J	BolC04g030560.2J	BolC01g003090.2J	BolC08g013570.2J	BolC08g016280.2J	BolC06g048590.2J
1868	BolC05g033510.2J	BolC07g024350.2J	BolC06g043690.2J	BolC04g058210.2J	BolC03g023660.2J	BolC07g055090.2J
1869	BolC03g000580.2J	BolC02g046980.2J	BolC09g041430.2J	BolC09g022130.2J	BolC02g006880.2J	BolCnng006120.2J
1870	BolC08g033830.2J	BolC05g005650.2J	BolC01g047150.2J	BolC01g045250.2J	BolC05g051660.2J	BolC06g027280.2J
1871	BolC09g028020.2J	BolC06g045200.2J	BolC07g039100.2J	BolC06g035650.2J	BolC01g005770.2J	BolC06g027310.2J
1872	BolC03g068750.2J	BolC06g040760.2J	BolC04g017780.2J	BolC02g063060.2J	BolC03g046800.2J	BolC04g001890.2J
1873	BolC04g020760.2J	BolC03g054990.2J	BolC05g045770.2J	BolC07g059270.2J	BolC08g049890.2J	BolC02g037840.2J
1874	BolC09g002160.2J	BolC02g022400.2J	BolC05g031400.2J	BolC02g044030.2J	BolC09g047510.2J	BolC07g027030.2J
1875	BolC05g024800.2J	BolC09g027770.2J	BolC09g016210.2J	BolC05g030010.2J	BolC06g002350.2J	BolC03g011430.2J
1876	BolC05g000730.2J	BolC06g049920.2J	BolC02g004450.2J	BolCnng005430.2J	BolC01g001380.2J	BolC01g004070.2J
1877	BolC04g003090.2J	BolC05g057070.2J	BolC06g035040.2J	BolC05g029070.2J	BolC09g014210.2J	BolC08g017510.2J
1878	BolC04g007390.2J	BolC02g003590.2J	BolC02g040740.2J	BolC09g041750.2J	BolC04g014220.2J	BolC07g059320.2J
1879	BolC09g016350.2J	BolCnng004910.2J	BolC03g038890.2J	BolC05g035850.2J	BolC07g005620.2J	BolC05g034160.2J
1880	BolC05g063090.2J	BolC01g039850.2J	BolC08g058950.2J	BolC02g026740.2J	BolC07g041430.2J	BolC03g001980.2J
1881	BolC03g054470.2J	BolC03g065420.2J	BolC03g048160.2J	BolC07g038990.2J	BolC03g080160.2J	BolC04g054390.2J
1882	BolC04g065080.2J	BolC09g042110.2J	BolC05g003800.2J	BolC05g045540.2J	BolC06g036490.2J	BolC07g017940.2J
1883	BolC03g025040.2J	BolC03g031830.2J	BolC02g022720.2J	BolC04g025850.2J	BolC03g039300.2J	BolC08g022640.2J
1884	BolC03g010560.2J	BolC06g048010.2J	BolC01g027640.2J	BolC09g014150.2J	BolC09g019210.2J	BolC03g082960.2J
1885	BolC07g030500.2J	BolC01g006650.2J	BolC02g001960.2J	BolC05g011080.2J	BolC03g055690.2J	BolC03g061090.2J
1886	BolC07g030100.2J	BolC08g017600.2J	BolC03g034440.2J	BolC07g015350.2J	BolC01g005100.2J	BolC02g031030.2J
1887	BolC05g025870.2J	BolC04g027430.2J	BolC02g000560.2J	BolC06g022980.2J	BolC06g049470.2J	BolC03g000380.2J
1888	BolC03g069650.2J	BolC08g031000.2J	BolC01g002020.2J	BolC09g006010.2J	BolC05g052240.2J	BolC09g060270.2J
1889	BolC07g049120.2J	BolC07g059270.2J	BolC01g027870.2J	BolC07g051210.2J	BolC04g017250.2J	BolC03g003230.2J
1890	BolC09g047580.2J	BolC09g030150.2J	BolC06g029750.2J	BolC08g051640.2J	BolC09g035420.2J	BolC08g052390.2J
1891	BolC08g058130.2J	BolC02g023300.2J	BolC05g051160.2J	BolC08g021140.2J	BolC06g032860.2J	BolC07g015990.2J
1892	BolC01g057560.2J	BolC06g016310.2J	BolC04g012240.2J	BolC09g007930.2J	BolC07g042090.2J	BolC01g001910.2J
1893	BolC04g018830.2J	BolC03g079060.2J	BolC05g045630.2J	BolC09g026330.2J	BolC06g008350.2J	BolC06g045430.2J
1894	BolC06g042650.2J	BolC05g012190.2J	BolC01g017710.2J	BolC01g024960.2J	BolC02g018250.2J	BolC01g043070.2J
1895	BolC08g055330.2J	BolC04g053500.2J	BolC04g042730.2J	BolC06g028780.2J	BolC06g032880.2J	BolC05g009050.2J
1896	BolC02g021140.2J	BolC03g043520.2J	BolC06g039700.2J	BolC02g000510.2J	BolC04g039840.2J	BolC07g023610.2J
1897	BolC07g060590.2J	BolC08g009840.2J	BolC07g018580.2J	BolC03g029580.2J	BolC03g044710.2J	BolC05g063220.2J
1898	BolC09g022190.2J	BolC03g054290.2J	BolC07g043370.2J	BolC05g056730.2J	BolC05g061930.2J	BolC09g069710.2J
1899	BolC09g021070.2J	BolC06g031600.2J	BolC01g020980.2J	BolC08g001640.2J	BolC02g055020.2J	BolC05g005650.2J
1900	BolC06g006190.2J	BolC03g003080.2J	BolC05g027040.2J	BolC06g003630.2J	BolC03g001170.2J	BolC04g012830.2J
1901	BolC04g003290.2J	BolC01g024000.2J	BolC02g048380.2J	BolC05g039520.2J	BolC03g036100.2J	BolC04g068670.2J
1902	BolC05g010710.2J	BolC09g043290.2J	BolC03g023920.2J	BolC07g008230.2J	BolC08g008660.2J	BolC05g043730.2J
1903	BolC04g018850.2J	BolC09g029190.2J	BolC05g016020.2J	BolC01g050060.2J	BolC03g061720.2J	BolC02g014670.2J
1904	BolC07g043930.2J	BolC05g004500.2J	BolC01g047200.2J	BolC06g007340.2J	BolC01g014930.2J	BolC03g078510.2J
1905	BolC09g027060.2J	BolC08g022120.2J	BolC03g003680.2J	BolC03g067600.2J	BolC09g013370.2J	BolC05g010650.2J
1906	BolC04g059620.2J	BolC05g000250.2J	BolC07g021620.2J	BolC03g013310.2J	BolC06g006330.2J	BolC05g051550.2J
1907	BolC09g006140.2J	BolC02g014630.2J	BolC09g046340.2J	BolC05g002510.2J	BolC05g026220.2J	BolC03g030110.2J
1908	BolC02g052800.2J	BolCnng002690.2J	BolC03g027840.2J	BolC08g006380.2J	BolC04g014640.2J	BolC07g009620.2J
1909	BolC04g013820.2J	BolC07g032540.2J	BolC09g007400.2J	BolC01g043250.2J	BolC02g020650.2J	BolC09g014710.2J
1910	BolC02g008740.2J	BolC04g049840.2J	BolC05g045780.2J	BolC06g036950.2J	BolC09g000600.2J	BolC01g005280.2J
1911	BolC05g016570.2J	BolC04g048280.2J	BolC08g044610.2J	BolC05g062670.2J	BolC05g047830.2J	BolC08g049080.2J
1912	BolC02g006930.2J	BolC02g056710.2J	BolC03g001060.2J	BolC02g035420.2J	BolC03g005260.2J	BolC08g012440.2J
1913	BolC05g059300.2J	BolC09g006460.2J	BolC01g014420.2J	BolC03g068860.2J	BolC01g044180.2J	BolC01g033950.2J
1914	BolC09g041800.2J	BolC05g008720.2J	BolC07g012020.2J	BolC03g064030.2J	BolC08g001790.2J	BolC01g023120.2J
1915	BolC04g048800.2J	BolC01g026350.2J	BolC05g013240.2J	BolC06g035150.2J	BolC08g037880.2J	BolC02g021990.2J
1916	BolC09g014390.2J	BolC05g057550.2J	BolC06g009870.2J	BolC01g004070.2J	BolC04g055870.2J	BolC03g057590.2J
1917	BolC06g039300.2J	BolC09g030750.2J	BolC03g026740.2J	BolC01g050720.2J	BolC03g007380.2J	BolC08g058910.2J
1918	BolC03g017970.2J	BolC09g006520.2J	BolC05g043430.2J	BolC09g064570.2J	BolC02g009380.2J	BolC06g049970.2J
1919	BolC04g036610.2J	BolC08g056270.2J	BolC02g037880.2J	BolC09g062800.2J	BolC07g051600.2J	BolC03g045050.2J
1920	BolC02g052300.2J	BolC05g049940.2J	BolC05g050550.2J	BolC03g045430.2J	BolC01g018380.2J	BolC04g063290.2J
1921	BolC09g021610.2J	BolC03g039730.2J	BolC04g011020.2J	BolC03g012980.2J	BolC07g026310.2J	BolC09g043670.2J
1922	BolC04g068010.2J	BolC04g066380.2J	BolC08g059130.2J	BolC09g031320.2J	BolC01g011610.2J	BolC01g055420.2J
1923	BolC01g003990.2J	BolC06g018650.2J	BolC04g018670.2J	BolC08g005610.2J	BolC09g015040.2J	BolC09g010650.2J
1924	BolC07g054920.2J	BolC05g059630.2J	BolC05g056780.2J	BolC07g036930.2J	BolC02g026810.2J	BolC05g000830.2J
1925	BolC01g025760.2J	BolC05g014700.2J	BolCnng005290.2J	BolC08g007800.2J	BolC02g032770.2J	BolC09g053440.2J
1926	BolC02g004950.2J	BolC09g069510.2J	BolC08g026200.2J	BolC05g018080.2J	BolC03g004290.2J	BolC01g041570.2J
1927	BolC01g032620.2J	BolC05g001790.2J	BolC04g020040.2J	BolC09g062010.2J	BolC04g039100.2J	BolC07g024350.2J
1928	BolC05g004680.2J	BolC08g054150.2J	BolC07g020260.2J	BolC07g044780.2J	BolC01g000700.2J	BolC09g025990.2J
1929	BolC09g003920.2J	BolC09g022970.2J	BolC07g049340.2J	BolC03g008960.2J	BolC09g057230.2J	BolC02g015350.2J
1930	BolC09g008030.2J	BolC06g027280.2J	BolC06g026690.2J	BolC02g019980.2J	BolC05g019950.2J	BolC05g059710.2J
1931	BolC08g051940.2J	BolC06g027310.2J	BolC03g024100.2J	BolC04g054110.2J	BolC02g049580.2J	BolC08g048980.2J
1932	BolC04g042160.2J	BolC05g052440.2J	BolC03g011950.2J	BolC09g047090.2J	BolC08g044710.2J	BolC03g073630.2J
1933	BolC03g045160.2J	BolC07g024910.2J	BolC08g035940.2J	BolC04g056210.2J	BolC08g023010.2J	BolC08g038170.2J
1934	BolC07g055170.2J	BolC02g014280.2J	BolC04g051470.2J	BolC02g019970.2J	BolC05g022550.2J	BolC03g028380.2J
1935	BolC07g029940.2J	BolC02g001140.2J	BolC01g009840.2J	BolC08g001780.2J	BolC05g060920.2J	BolC04g011290.2J
1936	BolC07g048580.2J	BolCnng002920.2J	BolC09g008900.2J	BolC02g054840.2J	BolC04g016800.2J	BolC07g047650.2J
1937	BolC04g050300.2J	BolC01g051170.2J	BolC04g046600.2J	BolC04g003110.2J	BolC02g020910.2J	BolC07g026800.2J
1938	BolC05g026040.2J	BolC01g001120.2J	BolC08g002260.2J	BolC05g062990.2J	BolC06g045910.2J	BolC03g010990.2J
1939	BolC03g040150.2J	BolC07g007000.2J	BolC08g044450.2J	BolC03g026310.2J	BolC07g058730.2J	BolC01g010890.2J
1940	BolC05g034810.2J	BolC05g063230.2J	BolC08g010220.2J	BolC05g063410.2J	BolC04g061950.2J	BolC07g054740.2J
1941	BolC04g050600.2J	BolC06g042310.2J	BolC03g030870.2J	BolC02g035110.2J	BolC02g010790.2J	BolC01g009770.2J
1942	BolC03g053070.2J	BolC09g058520.2J	BolC08g002820.2J	BolC04g048350.2J	BolC09g051020.2J	BolC03g011100.2J
1943	BolC03g001170.2J	BolC02g034240.2J	BolC01g047310.2J	BolC09g065730.2J	BolC01g057530.2J	BolC09g027130.2J
1944	BolC09g068970.2J	BolC08g002000.2J	BolC03g059050.2J	BolC08g056140.2J	BolC08g001060.2J	BolC07g058060.2J
1945	BolC01g016770.2J	BolC05g000690.2J	BolC05g034800.2J	BolC08g033310.2J	BolC09g056290.2J	BolC06g036670.2J
1946	BolC04g002970.2J	BolC03g056120.2J	BolC08g022250.2J	BolCnng005100.2J	BolC03g014130.2J	BolC06g014400.2J
1947	BolC02g002710.2J	BolC04g016300.2J	BolC02g007870.2J	BolC08g021860.2J	BolC02g058880.2J	BolC03g045560.2J
1948	BolC08g060270.2J	BolC03g011970.2J	BolC05g048540.2J	BolC01g015200.2J	BolC03g074150.2J	BolC01g009700.2J
1949	BolC08g052560.2J	BolC03g027550.2J	BolC05g001490.2J	BolC06g033850.2J	BolC01g028240.2J	BolC03g024960.2J
1950	BolC04g051050.2J	BolC01g028530.2J	BolC08g050450.2J	BolC09g003470.2J	BolC09g014250.2J	BolC07g038060.2J
1951	BolC03g046800.2J	BolC04g049480.2J	BolC07g055230.2J	BolC03g012880.2J	BolC05g052810.2J	BolC08g019040.2J
1952	BolC08g019620.2J	BolC08g019160.2J	BolC03g071920.2J	BolC04g057600.2J	BolC05g053520.2J	BolC08g042280.2J
1953	BolC04g039050.2J	BolC03g013290.2J	BolC02g062380.2J	BolC03g072370.2J	BolC09g005190.2J	BolC04g066490.2J
1954	BolCnng004010.2J	BolC04g067740.2J	BolC04g026510.2J	BolC03g009790.2J	BolC08g051350.2J	BolC01g055290.2J
1955	BolC04g021890.2J	BolC04g041220.2J	BolC03g077710.2J	BolC05g055990.2J	BolC09g014200.2J	BolC05g049940.2J
1956	BolC03g026290.2J	BolC08g038890.2J	BolC03g059390.2J	BolC04g002560.2J	BolC04g059860.2J	BolC03g066490.2J
1957	BolC09g000780.2J	BolC01g015200.2J	BolC04g037670.2J	BolC09g037280.2J	BolC06g018520.2J	BolC09g055870.2J
1958	BolC09g033860.2J	BolC01g056330.2J	BolC04g055120.2J	BolC01g043180.2J	BolC09g045690.2J	BolC08g050450.2J
1959	BolC03g057080.2J	BolC09g065880.2J	BolC03g012200.2J	BolC03g080510.2J	BolC02g049300.2J	BolC07g052510.2J
1960	BolC02g011400.2J	BolC03g035170.2J	BolC07g016570.2J	BolC03g076610.2J	BolC07g029750.2J	BolC05g002770.2J
1961	BolC01g024850.2J	BolC06g018870.2J	BolC08g055140.2J	BolC03g026970.2J	BolC07g025520.2J	BolC03g029850.2J
1962	BolC01g001180.2J	BolC04g034280.2J	BolC06g043440.2J	BolC08g025110.2J	BolC09g055120.2J	BolC07g056190.2J
1963	BolC01g029890.2J	BolC09g005800.2J	BolC07g037290.2J	BolC05g035170.2J	BolC03g065170.2J	BolC07g015930.2J
1964	BolC04g009380.2J	BolC07g050610.2J	BolC04g054950.2J	BolC05g049480.2J	BolC07g036710.2J	BolC03g014250.2J
1965	BolC03g025090.2J	BolC01g054460.2J	BolC07g000080.2J	BolC05g041340.2J	BolC04g054540.2J	BolC01g013320.2J
1966	BolC06g048370.2J	BolC01g006180.2J	BolC08g043690.2J	BolC09g018750.2J	BolC09g038870.2J	BolC06g030840.2J
1967	BolC03g005020.2J	BolC06g004220.2J	BolC03g057270.2J	BolC02g029490.2J	BolC04g067510.2J	BolC09g000440.2J
1968	BolC05g020260.2J	BolC02g037660.2J	BolC01g041020.2J	BolC08g006570.2J	BolC08g020750.2J	BolC05g006640.2J
1969	BolC03g084270.2J	BolC06g041680.2J	BolC09g008440.2J	BolC01g027740.2J	BolC08g060070.2J	BolC04g016540.2J
1970	BolC04g030530.2J	BolC06g025150.2J	BolC01g025340.2J	BolC09g044200.2J	BolC05g034050.2J	BolC08g006740.2J
1971	BolC08g060190.2J	BolC05g014900.2J	BolC04g016510.2J	BolC08g051970.2J	BolC09g011720.2J	BolC02g017330.2J
1972	BolC05g061580.2J	BolC01g030770.2J	BolC06g027260.2J	BolC09g062050.2J	BolC03g025260.2J	BolC07g058230.2J
1973	BolC05g057300.2J	BolC02g019790.2J	BolC08g059520.2J	BolC04g046010.2J	BolC09g002650.2J	BolC04g016660.2J
1974	BolC09g052210.2J	BolC04g029820.2J	BolC04g028300.2J	BolC06g040040.2J	BolC06g004530.2J	BolC07g046870.2J
1975	BolC01g056080.2J	BolC08g000920.2J	BolC01g026780.2J	BolC03g070720.2J	BolC03g055730.2J	BolC05g040950.2J
1976	BolC06g051020.2J	BolC03g013360.2J	BolC09g022060.2J	BolC09g057880.2J	BolC09g060770.2J	BolC08g028390.2J
1977	BolC09g039970.2J	BolC08g032160.2J	BolC01g053560.2J	BolC01g048450.2J	BolC06g035660.2J	BolC02g012920.2J
1978	BolC04g002200.2J	BolC01g045720.2J	BolC07g015050.2J	BolC07g007460.2J	BolC05g014590.2J	BolC05g018960.2J
1979	BolC04g031280.2J	BolC06g045060.2J	BolC07g030390.2J	BolC04g002190.2J	BolC05g026040.2J	BolC03g079540.2J
1980	BolC03g048070.2J	BolC03g020590.2J	BolC06g044060.2J	BolC09g030180.2J	BolC09g060530.2J	BolC04g011810.2J
1981	BolC09g050540.2J	BolCnng002700.2J	BolC09g010080.2J	BolC01g027820.2J	BolC03g035140.2J	BolC05g040440.2J
1982	BolC03g003970.2J	BolC02g025560.2J	BolC02g006990.2J	BolC03g004240.2J	BolC03g020000.2J	BolC04g068260.2J
1983	BolC06g021200.2J	BolC05g010010.2J	BolC07g056840.2J	BolC04g052380.2J	BolC06g049510.2J	BolC08g036480.2J
1984	BolC09g043230.2J	BolC07g032380.2J	BolC03g011820.2J	BolC02g016760.2J	BolC09g022770.2J	BolC06g042970.2J
1985	BolC02g008750.2J	BolC05g034660.2J	BolC01g051050.2J	BolC02g040820.2J	BolC05g006480.2J	BolC02g019100.2J
1986	BolC08g025750.2J	BolC06g049000.2J	BolC02g019220.2J	BolC02g034790.2J	BolC05g020640.2J	BolC08g017940.2J
1987	BolC01g016420.2J	BolC09g026150.2J	BolC08g015500.2J	BolC08g028500.2J	BolC05g007610.2J	BolC06g014590.2J
1988	BolC03g080380.2J	BolC09g030710.2J	BolC06g034410.2J	BolC02g020000.2J	BolC06g033050.2J	BolC09g010080.2J
1989	BolC04g031930.2J	BolC02g017440.2J	BolC09g062340.2J	BolC07g060100.2J	BolC01g037970.2J	BolC06g033080.2J
1990	BolC05g042170.2J	BolC02g028500.2J	BolC09g011270.2J	BolC01g023570.2J	BolC03g017490.2J	BolC02g050830.2J
1991	BolC08g025020.2J	BolC09g048610.2J	BolC09g044250.2J	BolC05g025140.2J	BolC01g008790.2J	BolC07g028390.2J
1992	BolC04g054730.2J	BolC01g042240.2J	BolC08g048350.2J	BolC09g064690.2J	BolC03g044470.2J	BolC05g060760.2J
1993	BolC03g017600.2J	BolC03g023810.2J	BolC04g010910.2J	BolC07g015390.2J	BolC02g020040.2J	BolC07g048840.2J
1994	BolC06g048880.2J	BolC03g080400.2J	BolC03g064690.2J	BolC02g051630.2J	BolC07g044040.2J	BolC05g051590.2J
1995	BolC08g043690.2J	BolC05g014550.2J	BolC07g001900.2J	BolC01g027040.2J	BolC05g056250.2J	BolC07g037440.2J
1996	BolC03g077670.2J	BolC07g045400.2J	BolC01g010750.2J	BolC03g065420.2J	BolC03g049680.2J	BolC03g026560.2J
1997	BolC07g041230.2J	BolC07g007460.2J	BolC03g011680.2J	BolC05g050350.2J	BolC09g058030.2J	BolC04g004390.2J
1998	BolC02g002660.2J	BolC02g056650.2J	BolC04g031150.2J	BolC03g010040.2J	BolC07g058560.2J	BolC09g039440.2J
[truncated: 3,755 more rows]
